# Supplementary material for: The effect of phytosulfokine alpha on haploid embryogenesis and gene expression of Brassica napus microspore cultures
Source: Front Plant Sci. 2024 Feb 15;15:1336519. doi: 10.3389/fpls.2024.1336519 (PMC10902448; doi:10.3389/fpls.2024.1336519)
Supplement: Supplementary file 2 [file Table_1.xlsx]

## Sheet: Table S1
Supplementary Material
Table S1: Numbers and percentages of reads mapped to reference genomes Brassica napus 4.1 and Da-Ae.
		Genome 4.1 (http://brassicadb.cn)		Da-Ae (NCBI)
Treatment	No. of reads	No. of mapped reads	% of mapped reads	No. of mapped reads	% of mapped reads
D0_1	40,295,222	32,917,730	81.69	39,163,631	97.19
D0_2	41,161,024	33,538,546	81.48	39,903,363	96.94
D0_3	58,766,330	48,012,838	81.70	57,101,706	97.17
D2-PSK_1	43,685,258	38,519,632	88.18	42,343,892	96.93
D2-PSK_2	44,541,792	39,395,574	88.45	43,238,467	97.07
D2-PSK_3	70,234,660	61,681,840	87.82	67,912,093	96.69
D2+PSK_1	40,066,812	35,844,912	89.46	38,840,662	96.94
D2+PSK_2	39,348,324	34,702,038	88.19	38,144,808	96.94
D2+PSK_3	50,590,224	44,279,411	87.53	48,857,592	96.58
D4-PSK_1	43,143,344	38,200,691	88.54	42,049,623	97.46
D4-PSK_2	41,291,802	36,502,242	88.40	40,217,163	97.40
D4-PSK_3	41,491,512	36,596,222	88.20	40,426,423	97.43
D4+PSK_1	41,820,576	36,844,028	88.10	40,779,204	97.51
D4+PSK_2	48,534,422	42,744,729	88.07	47,236,920	97.33
D4+PSK_3	48,948,866	43,086,917	88.02	47,655,618	97.36

## Sheet: Table S2
Supplementary Material
Table S2: Differential gene expression in Brasssica napus microspores on the second day of culture in NLN-13 medium with 0.1 µM PSK.
This table delineates 47 genes exhibiting distinctive expression patterns in microspores of Brassica napus DH4079 during the second day of culture when supplemented with 0.1 µM Phytosulfokine (PSK) in the standard NLN-13 medium. Utilizing RNA-Seq analysis, reads were mapped to the reference genome of B. napus Da-Ae. The study employed three transcriptomes, each corresponding to a distinct biologi…
Notably, two genes showed no detectable expression in microspores cultured in the standard NLN-13 medium, resulting in an expression value of 0 for control samples. Fold change and Log₂ fold change values, calculated to assess such differential expression, are denoted by asterisks (*).
Name	Chromosome	Region	Max group mean	Log₂ fold change	Fold change	FDR p-value	GeneID with hyperlink to NCBI
LOC125589270	NC_063435	complement(22006918..22008098)	29.395	12.584*	6,139.180*	0.003	125589270
LOC125602734	NW_026016208	complement(32012..33763)	4.248	10.243*	1,211.912*	0.043	125602734
LOC125596755	NW_026014698	complement(114021..115651)	3.858	7.895	237.989	0.004	125596755
LOC125596607	NW_026014662	complement(22034..24595)	3.966	7.062	133.613	0.000	125596607
LOC125609099	NC_063438	complement(25826936..25829314)	1.656	6.678	102.375	0.003	125609099
LOC125594840	NW_026014289	25531..28611	1.094	5.762	54.250	0.022	125594840
LOC125608832	NC_063438	complement(20706253..20710376)	3.590	5.277	38.760	0.000	125608832
LOC106354334	NC_063449	45031487..45034127	1.921	4.793	27.718	0.000	106354334
LOC125588284	NC_063435	complement(20057127..20058068)	27.865	3.777	13.709	0.008	125588284
LOC106445672	NC_063444	15209069..15209845	1.150	3.066	8.375	0.036	106445672
LOC125580440	NC_063435	25404406..25405844	12.754	2.833	7.127	0.046	125580440
LOC125596406	NW_026014628	complement(10445..12481)	0.634	2.569	5.933	0.011	125596406
LOC125603625	NW_026016444	71783..73929	34.909	2.427	5.377	0.015	125603625
BNAC02G07350D	NC_063435	complement(2207160..2208068)	6.768	1.678	3.200	0.031	106454313
LOC106436568	NC_063446	57069452..57071113	9.487	1.500	2.828	0.000	106436568
LOC106368532	NC_063442	complement(38193991..38197586)	1.189	1.462	2.755	0.038	106368532
LOC106451590	NW_026016631	complement(87084..90910)	13.585	1.391	2.623	0.026	106451590
LOC106386441	NC_063439	complement(27609960..27612101)	4.341	-1.204	-2.304	0.006	106386441
LOC125598864	NW_026015185	complement(21373..24588)	2.409	-1.212	-2.317	0.004	125598864
LOC106347881	NC_063434	complement(6639905..6642200)	13.557	-1.256	-2.388	0.000	106347881
LOC106389644	NC_063450	complement(22338637..22340270)	16.443	-1.268	-2.408	0.000	106389644
LOC111214172	NC_063435	complement(24079940..24081430)	4.529	-1.348	-2.545	0.011	111214172
LOC106440671	NC_063452	62982344..62984187	2.653	-1.389	-2.619	0.043	106440671
LOC106425829	NC_063445	4477073..4479830	7.210	-1.457	-2.745	0.000	106425829
LOC106450956	NC_063438	complement(3906816..3907760)	3.708	-1.471	-2.772	0.043	106450956
LOC106376949	NC_063436	24849432..24850071	3.940	-1.489	-2.806	0.012	106376949
LOC106386159	NC_063449	32733723..32735328	2.500	-1.541	-2.911	0.003	106386159
LOC106390731	NC_063447	38938864..38940140	3.242	-1.595	-3.022	0.003	106390731
LOC111197712	NC_063435	complement(8037337..8039790)	1.460	-1.793	-3.465	0.003	111197712
LOC106412358	NC_063451	46286747..46288802	1.168	-1.821	-3.533	0.003	106412358
LOC106442906	NC_063447	complement(10251535..10252424)	3.424	-1.863	-3.638	0.000	106442906
LOC106349099	NC_063450	complement(9095737..9097168)	1.380	-1.918	-3.778	0.005	106349099
LOC106376871	NC_063436	complement(22583882..22584637)	21.207	-2.023	-4.066	0.000	106376871
LOC125581319	NC_063445	complement(4685208..4687415)	1.043	-2.142	-4.414	0.011	125581319
LOC106368638	NC_063442	38970786..38972453	1.189	-2.217	-4.648	0.015	106368638
LOC106375370	NC_063450	33417684..33419779	2.447	-2.239	-4.721	0.000	106375370
LOC125585666	NC_063447	59327200..59328111	8.860	-2.316	-4.981	0.000	125585666
LOC106453640	NC_063438	7186236..7187692	1.646	-2.447	-5.453	0.004	106453640
LOC106370389	NC_063443	complement(12618330..12620332)	0.810	-2.455	-5.483	0.004	106370389
LOC106439790	NC_063436	complement(20661946..20663105)	4.440	-2.462	-5.508	0.000	106439790
LOC106426754	NC_063446	complement(34284528..34285795)	1.351	-2.849	-7.205	0.022	106426754
LOC125588812	NC_063449	complement(15908981..15915875)	0.205	-3.024	-8.134	0.006	125588812
LOC125581325	NC_063435	28166155..28170011	0.655	-3.047	-8.264	0.006	125581325
LOC106357039	NC_063440	21062981..21065228	0.926	-3.126	-8.729	0.003	106357039
LOC125589932	NC_063450	complement(45847233..45847995)	2.359	-3.249	-9.508	0.000	125589932
LOC106361471	NC_063441	17313000..17314951	0.834	-3.566	-11.847	0.000	106361471
LOC106382765	NW_026015854	complement(104640..109072)	0.661	-5.222	-37.317	0.022	106382765

## Sheet: Table S3
Supplementary Material
Table S3: Differential gene expression in Brasssica napus microspores on the fourth day of culture in NLN-13 medium with 0.1 µM PSK.
This table delineates 305 genes exhibiting distinctive expression patterns in microspores of Brassica napus DH4079 during the second day of culture when supplemented with 0.1 µM Phytosulfokine (PSK) in the standard NLN-13 medium. Utilizing RNA-Seq analysis, reads were mapped to the reference genome of B. napus Da-Ae. The study employed three transcriptomes, each corresponding to a distinct biolog…
Notably, one gene showed no detectable expression in microspores cultured in the standard NLN-13 medium, resulting in an expression value of 0 for control samples. Fold change and Log₂ fold change values, calculated to assess such differential expression, are denoted by asterisks (*).
Name	Chromosome	Region	Max group mean	Log₂ fold change	Fold change	FDR p-value	GeneID with hyperlink to NCBI
LOC125580626	NC_063435	26312779..26313377	6.921	-9.389*	-670.574*	0.015	125580626
LOC125575084	NW_026014871	complement(76882..78972)	5.242	-6.755	-108.025	0.000	125575084
LOC125608832	NC_063438	complement(20706253..20710376)	0.913	-6.086	-67.936	0.002	125608832
LOC106454854	NC_063442	32728729..32730550	0.880	-5.597	-48.387	0.003	106454854
LOC106392394	NC_063447	complement(39436025..39440620)	0.361	-4.905	-29.951	0.031	106392394
LOC106355231	NC_063444	11231016..11232189	4.083	-4.805	-27.954	0.000	106355231
LOC111200421	NC_063441	22810684..22811556	9.265	-4.775	-27.377	0.000	111200421
LOC106388327	NC_063436	complement(10839270..10840608)	2.662	-4.410	-21.256	0.000	106388327
LOC106445874	NC_063437	8256776..8258583	0.673	-4.298	-19.675	0.016	106445874
LOC125577223	NC_063441	complement(23146896..23152180)	1.258	-4.257	-19.125	0.000	125577223
LOC106446788	NC_063437	complement(14515267..14518167)	0.450	-4.214	-18.558	0.001	106446788
LOC125581325	NC_063435	28166155..28170011	1.933	-4.159	-17.868	0.000	125581325
LOC106438654	NC_063436	14402126..14404407	0.371	-4.115	-17.328	0.025	106438654
LOC106427079	NC_063443	complement(2856371..2858479)	0.293	-3.961	-15.578	0.035	106427079
LOC106351899	NC_063439	19426248..19426792	1.563	-3.959	-15.551	0.008	106351899
LOC111204439	NC_063446	complement(14925857..14927240)	1.202	-3.917	-15.106	0.000	111204439
LOC106356417	NC_063440	13021136..13022732	0.576	-3.906	-14.993	0.008	106356417
LOC106406388	NC_063447	59335288..59336194	1.525	-3.868	-14.598	0.001	106406388
LOC106405687	NC_063441	12801945..12804099	0.350	-3.803	-13.955	0.009	106405687
LOC125575075	NC_063451	complement(1440192..1441539)	1.866	-3.784	-13.773	0.000	125575075
LOC106367665	NC_063442	complement(33096902..33097762)	2.027	-3.708	-13.065	0.000	106367665
LOC125580262	NC_063444	40841707..40844584	0.511	-3.662	-12.655	0.000	125580262
LOC106397849	NC_063448	complement(643906..645078)	1.178	-3.653	-12.579	0.000	106397849
LOC125588812	NC_063449	complement(15908981..15915875)	0.591	-3.637	-12.445	0.000	125588812
LOC111200468	NC_063442	complement(2956275..2957144)	0.948	-3.559	-11.788	0.006	111200468
LOC106404431	NC_063435	28209262..28212352	1.327	-3.546	-11.679	0.000	106404431
LOC106367391	NC_063442	complement(27966913..27970491)	0.301	-3.501	-11.322	0.037	106367391
LOC106432221	NC_063452	complement(62741296..62743612)	0.793	-3.456	-10.976	0.000	106432221
LOC125587758	NC_063448	41440172..41444085	0.672	-3.362	-10.280	0.000	125587758
LOC106381087	NC_063449	complement(43456760..43459666)	0.507	-3.352	-10.209	0.006	106381087
LOC106428141	NC_063452	complement(2621642..2624346)	0.484	-3.313	-9.940	0.001	106428141
LOC106426754	NC_063446	complement(34284528..34285795)	4.174	-3.261	-9.583	0.000	106426754
LOC106361266	NC_063441	complement(6191635..6193582)	0.372	-3.238	-9.436	0.033	106361266
LOC106438681	NC_063436	14232114..14233533	1.210	-3.177	-9.041	0.006	106438681
LOC125577656	NC_063442	complement(1163065..1164852)	2.113	-3.098	-8.563	0.000	125577656
LOC106447234	NC_063448	9063902..9065095	1.031	-3.080	-8.458	0.005	106447234
LOC111211559	NC_063452	complement(2875448..2876282)	0.856	-3.077	-8.436	0.032	111211559
LOC106454533	NC_063438	complement(1166324..1167987)	0.618	-3.019	-8.108	0.010	106454533
LOC106367788	NC_063451	36211505..36215994	0.402	-2.986	-7.922	0.001	106367788
LOC106412229	NC_063441	19699484..19701001	0.510	-2.986	-7.920	0.043	106412229
LOC106438826	NC_063436	complement(13103494..13106409)	0.332	-2.956	-7.758	0.012	106438826
LOC106435242	NC_063440	complement(10265413..10267112)	0.749	-2.941	-7.678	0.014	106435242
LOC125594488	NW_026014088	247..3357	0.433	-2.930	-7.623	0.002	125594488
LOC106388605	NC_063446	21708250..21709674	2.415	-2.910	-7.518	0.000	106388605
LOC106402213	NC_063448	426960..428918	2.761	-2.836	-7.141	0.000	106402213
LOC111204744	NC_063446	66222149..66224294	0.494	-2.821	-7.066	0.002	111204744
LOC106365141	NC_063442	38636999..38638427	0.617	-2.819	-7.059	0.027	106365141
LOC106437150	NC_063450	48797888..48799752	0.441	-2.807	-6.998	0.026	106437150
LOC106423031	NC_063447	complement(56864042..56865532)	4.123	-2.806	-6.992	0.000	106423031
LOC106400786	NC_063447	complement(51380880..51383519)	0.533	-2.796	-6.947	0.004	106400786
LOC106380094	NC_063445	55855579..55859105	0.888	-2.796	-6.945	0.000	106380094
LOC106363952	NC_063452	complement(51790015..51791811)	1.379	-2.783	-6.885	0.000	106363952
LOC106357693	NC_063446	complement(58930626..58932661)	0.359	-2.783	-6.884	0.036	106357693
LOC106452083	NW_026016895	complement(44876..46148)	1.143	-2.764	-6.794	0.000	106452083
LOC106419064	NC_063452	complement(62219709..62220822)	1.520	-2.712	-6.551	0.000	106419064
LOC106368974	NC_063452	complement(11708797..11713452)	0.487	-2.703	-6.513	0.002	106368974
LOC125606866	NC_063436	complement(10874134..10880267)	0.254	-2.697	-6.483	0.002	125606866
LOC125575592	NC_063448	complement(28601830..28608129)	0.420	-2.694	-6.473	0.010	125575592
LOC106360896	NC_063438	complement(2143100..2144819)	2.350	-2.653	-6.289	0.000	106360896
LOC106420030	NC_063442	44152691..44153605	3.127	-2.648	-6.268	0.000	106420030
BNAC05G04010D	NC_063448	complement(2223280..2224872)	1.654	-2.615	-6.126	0.001	106401768
LOC106391082	NC_063444	20682006..20683627	0.876	-2.604	-6.078	0.001	106391082
LOC125578253	NC_063442	45027145..45028073	2.029	-2.590	-6.019	0.046	125578253
LOC106416438	NC_063435	complement(3383103..3384078)	1.266	-2.550	-5.857	0.013	106416438
LOC106396994	NC_063448	52997404..53013410	3.414	-2.545	-5.837	0.000	106396994
LOC125597793	NW_026014959	50363..52263	4.494	-2.523	-5.747	0.032	125597793
BNAC01G07530D	NC_063444	complement(4310134..4310890)	10.753	-2.516	-5.718	0.000	106434442
LOC106427788	NC_063434	15561526..15564168	0.784	-2.496	-5.641	0.000	106427788
LOC106426240	NC_063449	complement(38856906..38858139)	10.180	-2.479	-5.574	0.000	106426240
LOC106406178	NC_063447	54607613..54611788	0.487	-2.464	-5.518	0.034	106406178
LOC106376871	NC_063436	complement(22583882..22584637)	112.378	-2.461	-5.507	0.000	106376871
LOC106379281	NC_063445	complement(10593225..10594762)	2.368	-2.452	-5.472	0.000	106379281
LOC106424211	NC_063441	complement(14680096..14682066)	2.343	-2.413	-5.324	0.000	106424211
LOC106399202	NC_063448	54458802..54460187	3.337	-2.376	-5.189	0.000	106399202
LOC111211825	NC_063452	complement(6950152..6952677)	1.181	-2.371	-5.174	0.003	111211825
LOC106386627	NC_063446	4788951..4791409	0.797	-2.370	-5.171	0.001	106386627
LOC125585368	NC_063447	complement(14876971..14879949)	1.039	-2.367	-5.158	0.031	125585368
LOC106361471	NC_063441	17313000..17314951	2.512	-2.366	-5.155	0.000	106361471
LOC125609128	NC_063438	27464479..27465864	3.007	-2.354	-5.113	0.000	125609128
LOC106422042	NC_063435	complement(13432651..13434127)	0.921	-2.354	-5.113	0.020	106422042
LOC106424028	NC_063445	complement(649895..650952)	0.943	-2.334	-5.042	0.029	106424028
LOC106385998	NC_063445	complement(27271695..27273142)	0.786	-2.334	-5.042	0.035	106385998
LOC106392499	NC_063438	complement(2192154..2192721)	2.326	-2.322	-5.001	0.009	106392499
LOC106392350	NC_063435	complement(8982019..8983960)	0.611	-2.319	-4.989	0.037	106392350
LOC125583524	NC_063446	complement(72121905..72123140)	1.655	-2.317	-4.984	0.000	125583524
LOC106450879	NC_063438	2976927..2979730	0.694	-2.300	-4.924	0.005	106450879
LOC106379780	NC_063434	24244583..24247055	1.798	-2.289	-4.888	0.000	106379780
LOC111216014	NC_063438	complement(7693902..7694315)	3.031	-2.263	-4.801	0.006	111216014
LOC106440813	NC_063436	26265838..26267913	0.792	-2.260	-4.789	0.030	106440813
LOC106426519	NC_063450	19426994..19428721	0.595	-2.260	-4.789	0.016	106426519
LOC125585666	NC_063447	59327200..59328111	29.418	-2.257	-4.781	0.000	125585666
BNAA01G06260D	NC_063434	complement(3401785..3402500)	6.396	-2.244	-4.737	0.000	106376070
LOC111199500	NC_063440	complement(22441305..22442256)	2.927	-2.228	-4.686	0.001	111199500
LOC106404424	NC_063435	28191118..28194530	0.956	-2.222	-4.667	0.001	106404424
LOC106419464	NC_063443	complement(18331293..18333445)	1.223	-2.221	-4.661	0.000	106419464
LOC106415381	NC_063447	1112081..1115022	0.983	-2.216	-4.645	0.001	106415381
LOC111208336	NC_063450	53657471..53660262	0.840	-2.215	-4.644	0.002	111208336
LOC106357039	NC_063440	21062981..21065228	6.728	-2.215	-4.643	0.000	106357039
LOC106392565	NC_063446	11874039..11879524	0.403	-2.204	-4.608	0.000	106392565
LOC106427481	NC_063441	complement(1982047..1987355)	1.511	-2.201	-4.599	0.000	106427481
LOC106433565	NC_063446	73513665..73515363	2.451	-2.194	-4.577	0.000	106433565
LOC106349072	NC_063444	complement(19833391..19837360)	0.552	-2.171	-4.503	0.000	106349072
LOC106407421	NC_063450	complement(46115911..46117971)	0.527	-2.168	-4.494	0.025	106407421
LOC106400569	NC_063449	35798020..35799928	4.057	-2.167	-4.490	0.000	106400569
LOC106399688	NC_063448	complement(5356633..5358944)	0.564	-2.161	-4.471	0.035	106399688
LOC125575029	NC_063435	complement(10309526..10311201)	0.690	-2.155	-4.453	0.046	125575029
LOC106346378	NC_063439	complement(3049519..3051902)	0.561	-2.128	-4.372	0.040	106346378
LOC106352266	NC_063439	23676093..23676719	2.196	-2.117	-4.337	0.031	106352266
LOC106430427	NC_063445	complement(40402877..40405628)	0.910	-2.116	-4.334	0.000	106430427
LOC111210621	NC_063443	10432762..10434772	3.357	-2.114	-4.329	0.000	111210621
LOC125580574	NC_063444	3617054..3618079	1.247	-2.107	-4.308	0.042	125580574
LOC106352876	NC_063440	17013874..17016394	0.777	-2.079	-4.225	0.027	106352876
LOC106411627	NC_063451	complement(45071567..45072490)	9.605	-2.078	-4.222	0.000	106411627
LOC106372154	NC_063443	15543098..15546375	0.468	-2.071	-4.202	0.034	106372154
LOC106400782	NC_063448	4937575..4940606	0.843	-2.065	-4.184	0.004	106400782
BNAA05G14020D	NC_063438	complement(8885470..8886478)	13.951	-2.051	-4.143	0.000	106436487
LOC106387641	NC_063451	28871206..28871999	2.430	-2.047	-4.132	0.000	106387641
LOC106365512	NC_063442	complement(215562..218263)	0.716	-2.045	-4.126	0.009	106365512
LOC111200809	NC_063442	complement(1375606..1376950)	3.039	-2.031	-4.086	0.000	111200809
LOC106383071	NC_063449	complement(30439713..30445053)	0.811	-2.028	-4.078	0.000	106383071
LOC106353638	NC_063434	16386352..16388181	1.276	-2.021	-4.058	0.033	106353638
LOC106371512	NC_063443	11125652..11128123	0.596	-1.993	-3.982	0.032	106371512
LOC125577658	NC_063442	1295784..1298484	0.779	-1.977	-3.937	0.003	125577658
LOC106437640	NC_063434	complement(5805528..5807568)	0.984	-1.957	-3.882	0.020	106437640
LOC106443584	NC_063441	complement(573547..575154)	5.812	-1.942	-3.843	0.000	106443584
LOC125581330	NC_063445	5359304..5361938	5.848	-1.909	-3.755	0.000	125581330
LOC106439790	NC_063436	complement(20661946..20663105)	17.550	-1.904	-3.743	0.000	106439790
LOC106389674	NC_063446	32665851..32667860	1.166	-1.890	-3.706	0.001	106389674
LOC106352092	NC_063439	21930756..21931464	1.954	-1.887	-3.699	0.007	106352092
LOC106358856	NC_063441	11490111..11493166	0.747	-1.887	-3.698	0.009	106358856
LOC106407525	NC_063452	complement(53877650..53881897)	0.259	-1.876	-3.670	0.035	106407525
LOC106442906	NC_063447	complement(10251535..10252424)	76.666	-1.872	-3.661	0.000	106442906
LOC125594121	NW_026013974	39543..40647	1.418	-1.864	-3.639	0.020	125594121
LOC106416068	NC_063445	complement(1602075..1603189)	2.794	-1.863	-3.637	0.000	106416068
LOC106394639	NC_063447	3704531..3705193	5.005	-1.859	-3.627	0.001	106394639
LOC106415089	NC_063438	25129101..25131580	0.854	-1.846	-3.596	0.035	106415089
LOC106379710	NC_063445	complement(13815157..13816752)	1.223	-1.845	-3.592	0.012	106379710
LOC125593979	NW_026013939	34013..35129	2.879	-1.834	-3.564	0.000	125593979
LOC106388384	NC_063446	17474920..17476656	0.938	-1.818	-3.526	0.005	106388384
LOC125589932	NC_063450	complement(45847233..45847995)	4.606	-1.809	-3.503	0.000	125589932
LOC111212508	NC_063445	complement(47518521..47521254)	2.299	-1.806	-3.496	0.000	111212508
BNAA10G03900D	NC_063443	complement(2509655..2511407)	1.698	-1.785	-3.446	0.012	106371161
LOC106415391	NC_063436	20041454..20042869	1.658	-1.784	-3.444	0.002	106415391
LOC106372017	NC_063443	complement(15262195..15265315)	1.036	-1.783	-3.442	0.005	106372017
LOC106432956	NC_063442	6042620..6043426	27.851	-1.768	-3.406	0.000	106432956
LOC106375370	NC_063450	33417684..33419779	0.913	-1.750	-3.364	0.027	106375370
LOC106432553	NC_063445	585576..586472	55.726	-1.748	-3.359	0.000	106432553
LOC106390829	NC_063447	22157919..22158782	2.335	-1.748	-3.358	0.004	106390829
LOC106381913	NC_063444	27240456..27242464	1.194	-1.743	-3.347	0.001	106381913
LOC125587955	NC_063435	complement(19219845..19223314)	0.586	-1.737	-3.333	0.012	125587955
LOC106362760	NC_063442	5915659..5918347	3.218	-1.721	-3.297	0.000	106362760
LOC106370099	NC_063443	complement(1658398..1664238)	3.558	-1.719	-3.293	0.001	106370099
LOC106443544	NC_063452	25201851..25202665	6.850	-1.699	-3.248	0.000	106443544
LOC125578567	NC_063442	complement(40988187..40989131)	1.926	-1.689	-3.225	0.013	125578567
LOC106353335	NC_063440	complement(18888561..18894018)	0.385	-1.681	-3.207	0.010	106353335
LOC106376949	NC_063436	24849432..24850071	10.043	-1.677	-3.198	0.000	106376949
LOC106382585	NC_063442	33855891..33860622	0.688	-1.675	-3.194	0.003	106382585
LOC106419876	NC_063442	complement(43835170..43839207)	7.945	-1.670	-3.182	0.000	106419876
LOC106419072	NC_063436	complement(23053685..23055738)	2.207	-1.657	-3.154	0.000	106419072
LOC106440095	NC_063450	complement(45843221..45844536)	59.648	-1.657	-3.153	0.000	106440095
LOC106446917	NC_063437	complement(15502727..15503708)	6.450	-1.657	-3.153	0.000	106446917
LOC106440901	NC_063436	27180507..27181459	2.122	-1.652	-3.143	0.037	106440901
LOC106363719	NC_063444	2880059..2880381	22.967	-1.639	-3.115	0.000	106363719
LOC106378256	NC_063445	complement(41205467..41207766)	1.149	-1.637	-3.109	0.002	106378256
LOC125610170	NC_063439	complement(4000101..4001127)	13.654	-1.636	-3.108	0.000	125610170
LOC106392417	NC_063447	3148520..3150157	1.296	-1.635	-3.106	0.016	106392417
BNAA03G03630D	NC_063436	2054781..2056164	1.086	-1.635	-3.105	0.020	106420227
LOC106400894	NC_063448	complement(2474384..2476438)	0.729	-1.625	-3.085	0.045	106400894
LOC106430601	NC_063449	complement(15688933..15692062)	1.274	-1.622	-3.078	0.001	106430601
LOC125594965	NW_026014319	complement(5955..9662)	0.754	-1.620	-3.073	0.022	125594965
LOC106444805	NC_063445	14751403..14753958	0.893	-1.598	-3.026	0.017	106444805
LOC106385441	NC_063444	50852337..50853333	6.503	-1.595	-3.022	0.000	106385441
LOC106452811	NC_063446	complement(23649642..23650716)	3.508	-1.593	-3.016	0.003	106452811
LOC106454990	NW_026016604	8514..9013	18.687	-1.588	-3.006	0.000	106454990
LOC106370389	NC_063443	complement(12618330..12620332)	1.544	-1.572	-2.973	0.002	106370389
BNAA03G08870D	NC_063436	4535184..4538241	0.619	-1.564	-2.956	0.017	106419770
LOC106391522	NC_063441	complement(20404948..20405759)	2.445	-1.561	-2.951	0.011	106391522
LOC106354678	NC_063440	complement(27631154..27632914)	1.944	-1.554	-2.937	0.008	106354678
LOC106346204	NW_026014523	complement(13771..14797)	12.844	-1.553	-2.935	0.000	106346204
LOC106374705	NC_063446	complement(60803001..60805054)	1.042	-1.553	-2.935	0.029	106374705
LOC111203969	NC_063446	complement(20838090..20839506)	3.440	-1.545	-2.918	0.002	111203969
LOC106438460	NC_063436	complement(25972998..25973873)	84.635	-1.532	-2.892	0.000	106438460
LOC106386060	NC_063450	5087408..5088320	8.862	-1.529	-2.886	0.000	106386060
LOC106419576	NC_063451	complement(3444577..3446213)	140.524	-1.528	-2.884	0.000	106419576
LOC106388210	NC_063435	14698035..14701693	1.320	-1.524	-2.876	0.001	106388210
LOC125608066	NC_063437	16254349..16254980	8.561	-1.521	-2.870	0.000	125608066
BNAC01G05050D	NC_063444	2881418..2881931	24.097	-1.518	-2.864	0.000	106365203
LOC125609336	NC_063438	complement(5328824..5329737)	216.473	-1.513	-2.853	0.000	125609336
LOC106382199	NC_063452	4626871..4630708	0.694	-1.492	-2.812	0.027	106382199
LOC106439594	NC_063445	complement(42633065..42637285)	0.674	-1.490	-2.809	0.004	106439594
LOC106406418	NC_063449	9314969..9317043	1.883	-1.482	-2.794	0.007	106406418
LOC106421179	NC_063442	complement(24412318..24414173)	3.001	-1.477	-2.785	0.000	106421179
LOC106386900	NC_063446	5840293..5842568	2.508	-1.474	-2.778	0.000	106386900
BNAC03G71690D	NC_063446	complement(7386772..7387468)	9.603	-1.472	-2.773	0.000	106345979
LOC106348775	NC_063434	complement(26700149..26701752)	3.396	-1.470	-2.770	0.000	106348775
LOC106353446	NC_063440	complement(19531118..19532888)	1.353	-1.466	-2.762	0.021	106353446
LOC106375409	NC_063444	3938247..3940138	1.065	-1.458	-2.747	0.025	106375409
LOC106412124	NC_063451	45437723..45439436	1.770	-1.451	-2.733	0.011	106412124
LOC106424219	NC_063451	complement(1254268..1257130)	3.342	-1.450	-2.731	0.000	106424219
LOC125583590	NC_063446	53929592..53930439	3.342	-1.447	-2.727	0.007	125583590
LOC106369101	NC_063442	41918437..41920392	23.895	-1.446	-2.724	0.000	106369101
LOC106416703	NC_063445	13112442..13113765	7.790	-1.431	-2.697	0.000	106416703
BNAA03G46470D	NC_063436	26240982..26241846	3.734	-1.422	-2.679	0.002	106440818
LOC106365207	NC_063444	2895657..2896220	24.419	-1.420	-2.677	0.000	106365207
LOC106364038	NC_063450	complement(43637502..43638242)	2.158	-1.419	-2.673	0.045	106364038
LOC125593491	NC_063452	335318..337824	2.640	-1.408	-2.653	0.000	125593491
LOC106451716	NC_063451	26309467..26310531	2.003	-1.406	-2.650	0.013	106451716
LOC106401542	NC_063452	complement(5096994..5099115)	1.980	-1.405	-2.647	0.017	106401542
BNAA03G00540D	NC_063436	complement(324004..324827)	2.491	-1.399	-2.638	0.022	106443014
LOC106423787	NC_063434	complement(30623372..30624368)	5.968	-1.398	-2.635	0.000	106423787
LOC106435387	NC_063448	51021441..51023186	6.682	-1.392	-2.624	0.000	106435387
LOC106363975	NC_063451	42328428..42330061	3.303	-1.390	-2.620	0.000	106363975
LOC106404195	NC_063446	11021844..11025631	5.678	-1.387	-2.615	0.000	106404195
LOC125586907	NC_063448	12818235..12819323	1.834	-1.381	-2.605	0.020	125586907
LOC106426136	NC_063452	complement(56124132..56127832)	0.966	-1.379	-2.601	0.004	106426136
LOC106373585	NC_063444	6482177..6482834	33.518	-1.375	-2.594	0.000	106373585
LOC106386441	NC_063439	complement(27609960..27612101)	1.930	-1.366	-2.577	0.003	106386441
BNAA01G03700D	NC_063434	2451607..2451995	102.397	-1.361	-2.568	0.000	106438507
LOC106404917	NC_063452	complement(61522092..61526068)	2.355	-1.360	-2.568	0.002	106404917
LOC111198521	NC_063445	complement(48503100..48504892)	1.146	-1.355	-2.557	0.045	111198521
LOC106445657	NC_063437	4830985..4832242	5.272	-1.342	-2.535	0.000	106445657
LOC106434810	NC_063441	2756682..2757224	158.709	-1.341	-2.533	0.000	106434810
LOC125575618	NC_063448	complement(35935653..35938250)	1.049	-1.333	-2.519	0.044	125575618
LOC106418577	NC_063435	complement(5992388..5993885)	2.235	-1.322	-2.500	0.028	106418577
LOC106452560	NC_063445	8031472..8036796	1.111	-1.320	-2.497	0.004	106452560
LOC106350482	NC_063448	complement(4326024..4327156)	10.748	-1.309	-2.478	0.000	106350482
LOC111197712	NC_063435	complement(8037337..8039790)	4.543	-1.309	-2.478	0.000	111197712
LOC106437877	NC_063434	complement(5645345..5647093)	3.674	-1.309	-2.478	0.000	106437877
LOC106356455	NC_063440	13466062..13468333	5.871	-1.308	-2.476	0.000	106356455
LOC106374539	NC_063439	complement(5233626..5234411)	5.636	-1.281	-2.430	0.002	106374539
LOC125580546	NC_063444	complement(2252911..2254133)	2.964	-1.280	-2.428	0.003	125580546
LOC106365204	NC_063444	2887882..2889500	7.789	-1.273	-2.417	0.000	106365204
LOC106372313	NC_063452	complement(59157754..59159734)	4.478	-1.269	-2.410	0.000	106372313
LOC111200555	NC_063440	1498938..1499853	21.989	-1.269	-2.410	0.000	111200555
LOC106346722	NC_063440	complement(20158602..20159865)	3.285	-1.254	-2.385	0.000	106346722
LOC106450069	NC_063437	complement(16987429..16988199)	5.214	-1.240	-2.362	0.006	106450069
LOC106446247	NC_063434	10809483..10811399	1.349	-1.239	-2.361	0.012	106446247
LOC111200419	NC_063441	22806565..22809424	1.990	-1.232	-2.348	0.004	111200419
LOC106439079	NC_063441	complement(2741710..2743091)	293.410	-1.231	-2.347	0.000	106439079
LOC106376861	NC_063436	complement(22580490..22581814)	24.264	-1.217	-2.325	0.000	106376861
LOC106372226	NC_063452	57181346..57184375	1.497	-1.214	-2.320	0.046	106372226
LOC106396862	NC_063447	2306086..2308339	1.526	-1.205	-2.306	0.008	106396862
LOC106347965	NC_063445	56682553..56684123	12.405	-1.195	-2.290	0.000	106347965
LOC106447676	NC_063437	19307261..19310914	8.813	-1.191	-2.284	0.000	106447676
LOC106408244	NC_063435	4792095..4797576	3.938	-1.188	-2.278	0.000	106408244
LOC106368353	NC_063448	complement(4323529..4324660)	5.987	-1.181	-2.267	0.000	106368353
LOC106442795	NC_063434	8734435..8736256	1.974	-1.179	-2.264	0.023	106442795
LOC106382205	NC_063452	4668941..4671794	3.490	-1.176	-2.260	0.000	106382205
LOC106402475	NC_063449	9736328..9737521	2.830	-1.174	-2.256	0.003	106402475
LOC125578106	NC_063442	complement(18284948..18285513)	37.373	-1.165	-2.243	0.000	125578106
LOC106347825	NC_063447	44133103..44134495	9.292	-1.157	-2.230	0.000	106347825
LOC106371346	NC_063434	2972305..2973392	3.913	-1.155	-2.227	0.009	106371346
LOC106412321	NC_063435	6911367..6912730	4.063	-1.140	-2.204	0.002	106412321
LOC106403120	NC_063449	9746311..9747341	5.328	-1.139	-2.202	0.003	106403120
LOC106347881	NC_063434	complement(6639905..6642200)	15.788	-1.139	-2.202	0.000	106347881
LOC106347453	NC_063439	complement(10251629..10253104)	4.582	-1.113	-2.163	0.001	106347453
LOC106368708	NC_063442	complement(39679375..39687204)	0.573	-1.106	-2.152	0.003	106368708
LOC106446025	NC_063437	9746530..9747824	12.040	-1.103	-2.148	0.000	106446025
LOC106402267	NC_063444	complement(11479919..11481979)	10.167	-1.101	-2.146	0.000	106402267
LOC106363344	NC_063448	45220917..45222731	9.879	-1.101	-2.145	0.000	106363344
LOC106435448	NC_063445	770933..771777	2.966	-1.097	-2.140	0.050	106435448
LOC106439007	NC_063436	complement(15513299..15514542)	6.579	-1.087	-2.124	0.001	106439007
LOC106388827	NC_063446	complement(23767009..23768206)	7.042	-1.082	-2.116	0.000	106388827
LOC106438378	NC_063452	complement(62097306..62098290)	8.749	-1.078	-2.111	0.000	106438378
LOC125577640	NC_063442	complement(642854..647917)	0.900	-1.072	-2.102	0.019	125577640
LOC106425829	NC_063445	4477073..4479830	35.144	-1.070	-2.099	0.000	106425829
LOC125577720	NC_063434	complement(23838214..23839190)	21.297	-1.069	-2.099	0.001	125577720
LOC111214118	NC_063434	complement(7327509..7329567)	6.131	-1.069	-2.097	0.000	111214118
LOC106377386	NC_063444	complement(44142196..44146286)	1.892	-1.064	-2.091	0.037	106377386
LOC106357030	NC_063440	complement(21126933..21129199)	1.781	-1.063	-2.089	0.026	106357030
LOC106438469	NC_063436	12813413..12814627	5.985	-1.047	-2.066	0.000	106438469
LOC106445158	NC_063437	complement(4505283..4508332)	2.910	-1.036	-2.050	0.046	106445158
LOC106389644	NC_063450	complement(22338637..22340270)	9.513	-1.013	-2.018	0.000	106389644
LOC106381427	NC_063434	4577660..4578317	105.894	-1.009	-2.013	0.000	106381427
LOC106421148	NC_063442	24339724..24341313	2.064	1.054	2.076	0.043	106421148
LOC106390549	NC_063440	3431135..3433794	1.174	1.066	2.094	0.040	106390549
LOC106384921	NW_026014674	5927..11770	1.509	1.069	2.098	0.002	106384921
LOC106352697	NC_063440	complement(16127229..16131374)	1.278	1.078	2.111	0.018	106352697
LOC106430395	NC_063444	complement(32853879..32854627)	13.660	1.128	2.186	0.002	106430395
LOC106401268	NW_026014440	43218..48622	3.455	1.137	2.199	0.001	106401268
LOC106442625	NW_026016299	21334..24231	2.730	1.153	2.223	0.039	106442625
LOC106401673	NW_026015146	11501..19256	1.489	1.176	2.259	0.009	106401673
LOC125601687	NW_026015929	58765..63059	4.981	1.232	2.350	0.000	125601687
LOC125596395	NW_026014626	complement(34995..35588)	16.768	1.239	2.360	0.013	125596395
LOC106354597	NW_026014596	12342..15905	5.238	1.250	2.379	0.007	106354597
LOC106451859	NW_026014020	complement(363..3263)	2.092	1.318	2.492	0.002	106451859
LOC106367493	NC_063434	complement(13089061..13092146)	0.730	1.495	2.820	0.021	106367493
LOC125609048	NC_063438	complement(23828894..23836199)	0.795	1.501	2.831	0.007	125609048
LOC106433705	NC_063436	complement(3503499..3504261)	2.078	1.588	3.005	0.044	106433705
LOC106453640	NC_063438	7186236..7187692	2.935	1.911	3.759	0.003	106453640
LOC125579188	NC_063434	complement(28822345..28824674)	0.953	2.055	4.156	0.025	125579188
LOC106437035	NC_063450	30907815..30908447	18.823	2.072	4.204	0.022	106437035
LOC125597611	NW_026014921	complement(112589..116697)	0.716	2.113	4.326	0.001	125597611
LOC106361661	NC_063441	17963941..17968481	0.390	2.410	5.315	0.002	106361661
LOC106449756	NC_063434	9459949..9460736	1.489	2.663	6.334	0.004	106449756
LOC106436099	NC_063442	complement(24086665..24088757)	0.629	2.890	7.414	0.001	106436099
LOC106442148	NC_063434	complement(8163898..8171208)	0.162	3.016	8.087	0.042	106442148
LOC125602732	NW_026016208	complement(4454..5392)	10.558	3.119	8.690	0.005	125602732
LOC125606365	NW_026016906	340..2482	1.088	3.700	13.000	0.000	125606365
LOC106420597	NC_063447	complement(62455295..62456575)	0.532	3.884	14.762	0.049	106420597
LOC125599993	NW_026015493	44387..47782	0.635	4.543	23.310	0.002	125599993
LOC106387716	NC_063452	complement(56724716..56730726)	0.302	4.663	25.341	0.014	106387716
LOC106354354	NC_063449	45104876..45107024	1.340	4.665	25.373	0.003	106354354
LOC125593942	NW_026013930	12763..13440	3.314	6.517	91.587	0.009	125593942
LOC125603703	NW_026016459	complement(9124..11357)	5.993	10.409	1,359.278	0.009	125603703

## Sheet: Table S4
Supplementary Material
Table S4: Average expression values in TPM for genes coding for PSK, PSK receptors and PSK simulator proteins at the day of microspore isolation (D0), after 2 days of culture (D2-PSK, D2+PSK) and after 4 days of culture (D4-PSK, D4+PSK) and Log fold change differences in gene expression.
Certain genes showed no detectable expression in control samples. Log₂ fold change values, calculated to assess such differential expression, are denoted by asterisks (*).
						Data presented in Figure 7A						Data presented in Figure 7B
						Average expression values for three biological replicates per treatment (in TPM)						Log fold change differences in gene expression
Protein from Arabidopsis thaliana	Accession number of proteins of A.thaliana	Respective gene in Brassica napus	% of identity	NCBI description for Brassica napus		D0	D2-PSK	D2+PSK	D4-PSK	D4+PSK		D2+PSK vs. D2-PSK	D4+PSK vs. D4-PSK	D2-PSK vs. D0	D4-PSK vs. D0	D2+PSK vs. D0	D4+PSK vs. D0	D4-PSK vs. D2-PSK	D4+PSK vs. D2+PSK
PSK1	AT1G13590	LOC106374539	77.78	phytosulfokines 1	1	0.000	2.214	0.422	8.597	3.591		-2.257	-1.281	8.893*	10.670*	6.452*	9.463*	1.956	2.826
		LOC106400216	76.67	phytosulfokines 1-like	2	0.000	0.014	0.000	0.289	0.143		-1.813	-0.993	3.679*	7.593*		6.677*	4.034	4.780*
		LOC106414447	76.92	phytosulfokines 1	3	0.000	0.398	0.190	1.451	0.478		-0.886	-1.575	6.049*	7.740*	5.033*	6.235*	1.895	1.084
		LOC106434782	75.82	phytosulfokines 1	4	0.000	1.561	2.203	1.481	1.255		0.498	-0.252	8.084*	7.814*	8.393*	7.634*	-0.116	-0.859
PSK2	AT2G22860	LOC106392126	74.42	phytosulfokines 2	5	0.000	76.565	91.786	92.996	80.541		0.270	-0.240	14.538*	14.622*	14.615*	14.455*	0.241	-0.283
		LOC106449807	73.26	phytosulfokines 2	6	0.000	172.955	198.829	180.171	172.373		0.218	-0.092	15.650*	15.509*	15.674*	15.491*	0.017	-0.306
PSK3	AT3G44735	LOC106372650	75.76	putative phytosulfokines 6	7	2.136	3.002	3.158	11.551	7.331		0.074	-0.683	2.243	4.109	2.282	3.431	1.888	1.112
		LOC106376424	76.83	putative phytosulfokines 6	8	0.547	0.000	0.000	0.052	0.000			-1.939	-3.368	-1.381	-3.295	-3.407	1.904*
		LOC106428561	71.95	putative phytosulfokines 6	9	1.085	0.164	0.057	0.049	0.000		-1.538	-1.939	-0.486	-2.293	-2.249	-4.326	-1.609	-2.001
PSK4	AT3G49780	LOC106389059	82.05	phytosulfokines 3	10	0.552	0.991	0.554	1.665	0.855		-0.812	-0.966	2.543	3.131	1.694	2.173	0.604	0.462
		LOC106448152	79.49	phytosulfokines 3	11	0.236	0.420	0.466	0.948	0.559		0.218	-0.797	2.501	3.538	2.689	2.743	1.057	0.091
		LOC106449682	88.46	phytosulfokines 3	12	0.000	0.051	0.000	0.363	0.137		-1.813	-1.308	3.679*	6.142*		4.899*	2.579	3.010*
		LOC106454766	83.33	phytosulfokines 3	13	0.000	0.006	0.000	0.000	0.008		-1.813	1.814*	3.679*			3.622*	-1.859	1.754*
PSK5	AT5G65870	LOC106346627	78.95	phytosulfokines 5	14	1.161	0.000	0.000	0.053	0.332			2287	-4.370	-2.376	-4.295	-0.079	1.904*	4.156*
		LOC106348174	78.95	phytosulfokines 5	15	0.052	0.000	0.000	0.000	0.046			1.814*	-0.071	-0.068	-0.040	1.767		1.754*
		LOC106426265	79.22	phytosulfokines 5-like	16	0.686	0.044	0.000	0.000	0.105		-2.583	3.168*	-1.542	-4.129	-4.098	-1.014	-2.631	3.111*
		LOC106431224	80.52	phytosulfokines 5	17	0.689	0.092	0.024	0.045	0.095		-1.912	0.995	-0.799	-2.050	-2.807	-1.018	-1.160	1.653
PSK6	AT4G37720	LOC106409702	77.05	putative phytosulfokines 4	18	0.000	5.127	5.735	10.938	12.352		0.174	0.140	11.579*	12.464*	11.550*	12.671*	1.050	1.006
		LOC111199764	78.69	putative phytosulfokines 4	19	5.706	2.030	1.228	15.118	14.581		-0.616	-0.081	0.138	3.078	-0.480	2.989	2.935	3.436
		LOC125607243	76.19	VQ motif-containing protein 29-like	20	0.000	0.000	0.013	0.145	0.270		1.953*	0.870		6.628*	3.718*	7.568*	4.853*	3.751
PSKR1	AT2G02220	LOC106396130	78.92	phytosulfokine receptor 1	21	0.153	0.289	0.056	0.330	0.183		-2.223	-0.844	2.580	2.730	0.319	1.895	0.168	1.553
		LOC106411078	82.06	phytosulfokine receptor 1	22	0.163	0.221	0.056	0.421	0.157		-1.971	-1.435	2.223	3.037	0.201	1.599	0.830	1.365
		LOC106428480	79.35	phytosulfokine receptor 1-like	23	0.081	0.070	0.043	0.063	0.054		-0.649	-0.196	1.511	1.346	0.880	1.116	-0.112	0.171
PSKR2	AT5G53890	LOC106380952	79.43	phytosulfokine receptor 2	24	0.100	0.071	0.015	0.015	0.087		-2.019	2.346	1.305	-0.774	-0.726	1.579	-2.083	2.269
		LOC106390327	79.29	phytosulfokine receptor 2-like	25	0.000	0.105	0.017	0.030	0.041		-2.624	0.397	7.328*	5.378*	4.526*	5.843*	-1.796	1.189
		LOC106431123	79.88	phytosulfokine receptor 2	26	0.034	0.030	0.017	0.070	0.121		-0.939	0.759	1.756	2.725	0.786	3.431	0.995	2.576
		LOC125592972	80.26	phytosulfokine receptor 2-like	27	0.130	0.033	0.000	0.030	0.032		-3.944	0.121	0.001	-0.411	-4.018	-0.279	-0.323	3.651*
PSI1	AT1G34320	BNAC06G08150D	90.94	protein PSK SIMULATOR 1	28	3.613	0.075	0.034	0.175	0.164		-1.061	-0.158	-3.903	-2.665	-4.990	-2.822	1.252	2.139
		LOC106367043	90.92	protein PSK SIMULATOR 1	29	4.902	0.139	0.066	0.238	0.271		-1.008	0.136	-3.457	-2.663	-4.495	-2.544	0.796	1.924
PSI2	AT1G30755	LOC106367241	82.62	protein PSK SIMULATOR 2-like	30	1.201	0.030	0.105	0.444	0.324		1.725	-0.471	-3.447	0.233	-1.744	-0.243	3.684	1.466
		LOC106411159	82.70	protein PSK SIMULATOR 2-like	31	2.164	0.676	0.383	0.614	0.548		-0.790	-0.161	0.004	-0.155	-0.819	-0.316	-0.151	0.472
PSI3	AT5G08660	LOC106396306	85.95	protein PSK SIMULATOR 3-like	32	0.237	0.042	0.119	0.470	0.238		1.332	-0.979	-0.522	2.667	0.731	1.678	3.230	0.882
		LOC106419341	85.84	protein PSK SIMULATOR 3-like	33	0.570	0.193	0.145	0.564	0.463		-0.432	-0.273	0.122	1.608	-0.343	1.346	1.501	1.614
		LOC106380541	84.69	protein PSK SIMULATOR 3-like	34	0.184	0.265	0.251	0.933	0.776		-0.072	-0.280	2.302	4.019	2.162	3.766	1.758	1.546
		LOC125574825	84.38	protein PSK SIMULATOR 3-like	35	0.627	0.577	0.687	1.274	1.557		0.336	0.261	1.522	2.659	1.797	2.906	1.126	1.064

## Sheet: Table S5
Supplementary Material
Table S5: Differentially expressed genes encoding PSK, PSKR and PSI at various time points (D0, D2, D4) and under different treatments (-PSK and +PSK).
Expression results were subjected to filtering criterions FDR p-value of ≤ 0.05 and an absolute fold change exceeding 2.
Certain genes showed no detectable expression in control samples. Fold change and Log₂ fold change values, calculated to assess such differential expression, are denoted by asterisks (*).
Comparison D2-PSK vs. D0: 16 DEG
Name	Chromosome	Region	Max group mean	Log₂ fold change	Fold change	FDR p-value	GeneID with hyperlink to NCBI
LOC106448152	NC_063434	complement(13439958..13441078)	0.265	2.501	5.659	0.021	106448152
LOC106380541	NC_063435	466536..470188	0.167	2.302	4.931	0.002	106380541
LOC106390327	NC_063435	complement(6189462..6193255)	0.066	7.328*	160.664*	0.008	106390327
LOC106396130	NC_063435	complement(23672842..23676175)	0.182	2.580	5.980	0.000	106396130
LOC106449807	NC_063437	12787108..12788017	109.027	15.650*	51,413.709*	0.000	106449807
LOC106374539	NC_063439	complement(5233626..5234411)	1.398	8.893*	475.399*	0.001	106374539
LOC106367043	NC_063442	complement(23872544..23876419)	3.554	-3.457	-10.985	0.000	106367043
LOC106367241	NC_063442	26859777..26863071	0.871	-3.447	-10.905	0.000	106367241
LOC106434782	NC_063442	complement(41971267..41972472)	0.984	8.084*	271.436*	0.003	106434782
LOC125574825	NC_063443	complement(17425843..17429581)	0.454	1.522	2.873	0.001	125574825
LOC106372650	NC_063443	complement(19127399..19128636)	1.892	2.243	4.732	0.000	106372650
LOC106389059	NC_063444	complement(22164890..22165985)	0.623	2.543	5.829	0.001	106389059
LOC106392126	NC_063447	48623512..48624445	48.258	14.538*	23,796.569*	0.000	106392126
BNAC06G08150D	NC_063449	13535567..13539502	2.618	-3.903	-14.961	0.000	106345579
LOC106411078	NC_063450	complement(36810368..36813894)	0.139	2.223	4.668	0.001	106411078
LOC106409702	NC_063450	complement(54297709..54299268)	3.230	11.579*	3,059.186*	0.000	106409702
Comparison D2+PSK vs. D0: 11 DEG
Name	Chromosome	Region	Max group mean	Log₂ fold change	Fold change	FDR p-value	GeneID with hyperlink to NCBI
LOC106380541	NC_063435	466536..470188	0.159	2.162	4.476	0.010	106380541
LOC106449807	NC_063437	12787108..12788017	126.483	15.674*	52,278.211*	0.000	106449807
LOC106374539	NC_063439	complement(5233626..5234411)	0.265	6.452*	87.544*	0.021	106374539
LOC106367043	NC_063442	complement(23872544..23876419)	3.554	-4.495	-22.545	0.000	106367043
LOC106367241	NC_063442	26859777..26863071	0.871	-1.744	-3.349	0.010	106367241
LOC106434782	NC_063442	complement(41971267..41972472)	1.395	8.393*	336.222*	0.001	106434782
LOC125574825	NC_063443	complement(17425843..17429581)	0.454	1.797	3.475	0.000	125574825
LOC106372650	NC_063443	complement(19127399..19128636)	2.006	2.282	4.863	0.000	106372650
LOC106392126	NC_063447	48623512..48624445	58.341	14.615*	25,088.360*	0.000	106392126
BNAC06G08150D	NC_063449	13535567..13539502	2.618	-4.990	-31.772	0.000	106345579
LOC106409702	NC_063450	complement(54297709..54299268)	3.646	11.550*	2,998.311*	0.000	106409702
Comparison D4-PSK vs. D0: 22 DEG
Name	Chromosome	Region	Max group mean	Log₂ fold change	Fold change	FDR p-value	GeneID with hyperlink to NCBI
LOC106448152	NC_063434	complement(13439958..13441078)	0.621	3.538	11.615	0.000	106448152
LOC106380541	NC_063435	466536..470188	0.612	4.019	16.208	0.000	106380541
LOC106396130	NC_063435	complement(23672842..23676175)	0.216	2.730	6.632	0.000	106396130
LOC125607243	NC_063436	32096229..32099412	0.095	6.628*	98.897*	0.015	125607243
LOC106449807	NC_063437	12787108..12788017	118.193	15.509*	46,643.874*	0.000	106449807
LOC106374539	NC_063439	complement(5233626..5234411)	5.636	10.670*	1,629.111*	0.000	106374539
LOC111199764	NC_063441	complement(16658975..16659554)	9.923	3.078	8.442	0.000	111199764
LOC106367043	NC_063442	complement(23872544..23876419)	3.554	-2.663	-6.335	0.000	106367043
LOC106434782	NC_063442	complement(41971267..41972472)	0.973	7.814*	225.061*	0.003	106434782
LOC106431123	NC_063443	9163749..9167583	0.046	2.725	6.610	0.033	106431123
LOC125574825	NC_063443	complement(17425843..17429581)	0.835	2.659	6.318	0.000	125574825
LOC106372650	NC_063443	complement(19127399..19128636)	7.575	4.109	17.261	0.000	106372650
LOC106389059	NC_063444	complement(22164890..22165985)	1.092	3.131	8.763	0.000	106389059
LOC106396306	NC_063445	1358496..1362230	0.308	2.667	6.351	0.000	106396306
LOC106392126	NC_063447	48623512..48624445	61.025	14.622*	25,218.514*	0.000	106392126
LOC106400216	NC_063448	6183582..6185701	0.189	7.593*	193.093*	0.004	106400216
BNAC06G08150D	NC_063449	13535567..13539502	2.618	-2.665	-6.343	0.000	106345579
LOC106411078	NC_063450	complement(36810368..36813894)	0.276	3.037	8.209	0.000	106411078
LOC106409702	NC_063450	complement(54297709..54299268)	7.179	12.464*	5,651.380*	0.000	106409702
LOC106449682	NC_063451	33650711..33651840	0.238	6.142*	70.597*	0.031	106449682
LOC106414447	NC_063451	complement(46371402..46372265)	0.952	7.740*	213.750*	0.003	106414447
LOC106419341	NC_063452	complement(61400947..61404671)	0.414	1.608	3.048	0.000	106419341
Comparison D4+PSK vs. D0: 21 DEG
Name	Chromosome	Region	Max group mean	Log₂ fold change	Fold change	FDR p-value	GeneID with hyperlink to NCBI
LOC106448152	NC_063434	complement(13439958..13441078)	0.364	2.743	6.694	0.009	106448152
LOC106380541	NC_063435	466536..470188	0.506	3.766	13.606	0.000	106380541
LOC106390327	NC_063435	complement(6189462..6193255)	0.027	5.843*	57.405*	0.045	106390327
LOC106396130	NC_063435	complement(23672842..23676175)	0.119	1.895	3.719	0.024	106396130
LOC125607243	NC_063436	32096229..32099412	0.176	7.568*	189.780*	0.005	125607243
LOC106449807	NC_063437	12787108..12788017	112.407	15.491*	46040.036*	0.000	106449807
LOC106374539	NC_063439	complement(5233626..5234411)	2.341	9.463*	705.604*	0.000	106374539
LOC111199764	NC_063441	complement(16658975..16659554)	9.508	2.989	7.942	0.000	111199764
LOC106367043	NC_063442	complement(23872544..23876419)	3.554	-2.544	-5.831	0.000	106367043
LOC106434782	NC_063442	complement(41971267..41972472)	0.819	7.634*	198.659*	0.004	106434782
LOC106431123	NC_063443	9163749..9167583	0.079	3.431	10.787	0.009	106431123
LOC125574825	NC_063443	complement(17425843..17429581)	1.015	2.906	7.494	0.000	125574825
LOC106372650	NC_063443	complement(19127399..19128636)	4.780	3.431	10.788	0.000	106372650
LOC106389059	NC_063444	complement(22164890..22165985)	0.558	2.173	4.509	0.009	106389059
LOC106392126	NC_063447	48623512..48624445	52.528	14.455*	22453.697*	0.000	106392126
LOC106400216	NC_063448	6183582..6185701	0.093	6.677*	102.343*	0.016	106400216
BNAC06G08150D	NC_063449	13535567..13539502	2.618	-2.822	-7.073	0.000	106345579
LOC106411078	NC_063450	complement(36810368..36813894)	0.119	1.599	3.030	0.028	106411078
LOC106409702	NC_063450	complement(54297709..54299268)	8.054	12.671*	6520.293*	0.000	106409702
LOC106414447	NC_063451	complement(46371402..46372265)	0.311	6.235*	75.335*	0.028	106414447
LOC106419341	NC_063452	complement(61400947..61404671)	0.414	1.346	2.542	0.007	106419341

## Sheet: Table S6
Supplementary Material
Table S6: Differentially expressed molecular markers for microspore embryogenesis at various time points (D0, D2, D4) and treatments (-PSK and +PSK).
Expression results were subjected to filtering criterions FDR p-value of ≤ 0.05 and an absolute fold change exceeding 2.
Certain genes showed no detectable expression in control samples. Fold change and Log₂ fold change values, calculated to assess such differential expression, are denoted by asterisks (*).
Comparison D2+PSK vs. D2-PSK: 3 DEG
Name	Chromosome	Region	Max group mean	Log₂ fold change	Fold change	FDR p-value	GeneID with hyperlink to NCBI	Description in NCBI
LOC106445672	NC_063444	15209069..15209845	1.150	3.066	8.375	0.036	106445672	napin-like
LOC106425829	NC_063445	4477073..4479830	7.210	-1.457	-2.745	0.000	106425829	leucine-rich repeat protein 1
LOC106412358	NC_063451	46286747..46288802	1.168	-1.821	-3.533	0.003	106412358	cytochrome P450 78A5-like
Comparison D2-PSK vs. D0: 72 DEG
Name	Chromosome	Region	Max group mean	Log₂ fold change	Fold change	FDR p-value	GeneID with hyperlink to NCBI
LOC106403563	NC_063434	complement(840774..842936)	1.109	1.527	2.881	0.000	106403563
BNAA01G03700D	NC_063434	2451607..2451995	2.501	9.275*	619.448*	0.000	106438507
LOC106444749	NC_063434	9426010..9426759	6.482	11.625*	3,159.373*	0.000	106444749
LOC106444760	NC_063434	9432964..9433714	0.120	5.883*	59.023*	0.044	106444760
LOC106449768	NC_063434	9446934..9447723	0.278	7.152*	142.204*	0.010	106449768
LOC106449756	NC_063434	9459949..9460736	0.381	7.709*	209.202*	0.005	106449756
LOC106446315	NC_063434	complement(10827375..10828131)	2.439	10.234*	1,204.220*	0.000	106446315
LOC106380511	NC_063435	complement(330132..338297)	2.747	1.219	2.327	0.000	106380511
LOC106409762	NC_063435	complement(2164118..2168405)	0.100	7.527*	184.400*	0.009	106409762
LOC106357280	NC_063435	complement(2406782..2410507)	0.903	4.931	30.512	0.000	106357280
LOC106380186	NC_063435	complement(12054285..12057345)	0.885	4.074	16.843	0.000	106380186
LOC106351371	NC_063435	21209563..21212544	0.485	2.557	5.886	0.000	106351371
LOC106402246	NC_063435	complement(25010951..25013155)	0.610	8.918*	483.853*	0.001	106402246
LOC106433705	NC_063436	complement(3503499..3504261)	1.154	9.114*	553.976*	0.001	106433705
LOC106436552	NC_063436	complement(5280364..5282914)	0.215	3.408	10.612	0.000	106436552
LOC106443480	NC_063436	complement(8154068..8157106)	0.856	3.056	8.318	0.000	106443480
LOC106415391	NC_063436	20041454..20042869	0.281	8.054*	265.846*	0.003	106415391
LOC125607048	NC_063436	complement(20170748..20173663)	0.652	1.306	2.472	0.000	125607048
LOC106440948	NC_063436	27247093..27247791	0.947	6.046	66.061	0.000	106440948
LOC106442865	NC_063436	complement(30359840..30362626)	72.466	16.979*	129,155.356*	0.000	106442865
LOC111215526	NC_063438	complement(2903636..2908068)	0.132	3.513	11.417	0.000	111215526
LOC125608921	NC_063438	complement(21387911..21389764)	0.372	8.354*	327.180*	0.002	125608921
LOC125594318	NW_026014040	complement(32656..34353)	0.816	5.624	49.319	0.000	125594318
LOC106346237	NC_063439	3781998..3784686	2.427	1.182	2.269	0.000	106346237
LOC106428928	NC_063439	complement(10645599..10647455)	0.259	7.831*	227.661*	0.004	106428928
LOC106349544	NC_063439	28397037..28399408	45.100	1.618	3.070	0.000	106349544
LOC106356333	NC_063440	10806170..10809806	1.449	8.465	353.367	0.000	106356333
LOC106358189	NC_063440	12740337..12742203	0.862	8.667*	406.584*	0.001	106358189
LOC106371867	NC_063441	4088362..4091825	0.727	1.836	3.569	0.000	106371867
LOC106418025	NC_063442	28762193..28770729	0.096	8.544*	373.143*	0.001	106418025
LOC106454772	NC_063442	31912956..31915575	0.784	9.099*	548.216*	0.001	106454772
LOC106369101	NC_063442	41918437..41920392	1.097	6.734	106.481	0.000	106369101
LOC106371512	NC_063443	11125652..11128123	0.252	8.086*	271.726*	0.003	106371512
LOC106385624	NC_063443	14877552..14881001	0.867	7.409	169.940	0.000	106385624
LOC106426780	NC_063444	complement(886594..889848)	0.298	4.142	17.660	0.000	106426780
LOC106369747	NC_063444	complement(922003..923897)	0.701	4.690	25.812	0.000	106369747
LOC106363719	NC_063444	2880059..2880381	0.345	6.276*	77.496*	0.034	106363719
BNAC01G05050D	NC_063444	2881418..2881931	0.231	6.276*	77.505*	0.030	106365203
LOC106365204	NC_063444	2887882..2889500	0.350	8.470*	354.701*	0.001	106365204
LOC106365207	NC_063444	2895657..2896220	0.864	8.353*	326.895*	0.002	106365207
LOC106436546	NC_063444	complement(11814871..11820633)	0.065	7.756*	216.163*	0.004	106436546
LOC106445652	NC_063444	15196473..15197220	3.046	6.667	101.589	0.000	106445652
LOC106391998	NC_063444	complement(17371966..17372726)	10.857	12.376*	5,313.911*	0.000	106391998
LOC106430395	NC_063444	complement(32853879..32854627)	4.148	10.982*	2,021.956*	0.000	106430395
LOC125580263	NC_063444	complement(40862700..40864932)	0.943	1.540	2.908	0.000	125580263
LOC106425829	NC_063445	4477073..4479830	7.210	3.754	13.496	0.000	106425829
LOC106371587	NC_063445	complement(40504265..40506624)	65.622	2.858	7.248	0.000	106371587
LOC106380253	NC_063445	44508632..44510666	0.149	4.317	19.933	0.003	106380253
LOC106347726	NC_063445	complement(50713853..50716757)	0.160	7.755*	216.027*	0.004	106347726
LOC106386551	NC_063446	complement(4470048..4470821)	7.044	11.773*	3,498.854*	0.000	106386551
LOC106385562	NC_063446	complement(10691837..10695317)	3.994	4.240	18.901	0.000	106385562
LOC106358162	NC_063446	28585436..28586822	0.392	8.407*	339.548*	0.002	106358162
LOC106389674	NC_063446	32665851..32667860	0.492	2.768	6.811	0.000	106389674
LOC106418223	NC_063446	33330253..33333052	0.162	2.580	5.977	0.005	106418223
LOC106390964	NC_063446	complement(60621143..60623247)	0.054	6.093*	68.249*	0.036	106390964
LOC106396387	NC_063447	complement(20567958..20570441)	34.331	1.133	2.193	0.000	106396387
LOC106402213	NC_063448	426960..428918	0.431	9.000*	512.063*	0.001	106402213
LOC125575342	NC_063448	complement(13728954..13729598)	0.129	5.883*	59.015*	0.049	125575342
LOC125586844	NC_063448	complement(19653055..19657416)	0.540	9.282*	622.690*	0.000	125586844
LOC106397742	NC_063448	complement(42776640..42778408)	0.205	4.548	23.393	0.000	106397742
LOC106416630	NC_063448	complement(44090740..44092820)	0.763	1.513	2.855	0.004	106416630
LOC106395640	NC_063450	21951889..21956784	0.622	9.464*	706.255*	0.000	106395640
LOC106425624	NC_063450	26425187..26427077	0.687	8.311*	317.683*	0.002	106425624
LOC106436712	NC_063450	complement(53104306..53107331)	158.885	18.232*	307,918.223*	0.000	106436712
LOC106405852	NC_063451	6956955..6959485	4.931	3.541	11.643	0.000	106405852
LOC106444219	NC_063451	32369079..32370924	0.628	5.737	53.332	0.000	106444219
LOC106412358	NC_063451	46286747..46288802	1.168	7.307	158.373	0.000	106412358
LOC106439153	NC_063452	30496580..30498670	2.056	1.134	2.194	0.000	106439153
LOC106397759	NC_063452	48368918..48371421	0.194	7.816*	225.349*	0.004	106397759
LOC106421350	NC_063452	complement(53441021..53443886)	4.782	1.382	2.607	0.000	106421350
LOC106426170	NC_063452	56612350..56615857	1.312	4.557	23.536	0.000	106426170
LOC125600334	NW_026015605	36248..39229	0.351	2.433	5.400	0.000	125600334
Comparison D2+PSK vs. D0: 85 DEG
Name	Chromosome	Region	Max group mean	Log₂ fold change	Fold change	FDR p-value	GeneID with hyperlink to NCBI
LOC106403563	NC_063434	complement(840774..842936)	1.276	2.108	4.311	0.000	106403563
BNAA01G03700D	NC_063434	2451607..2451995	1.260	8.065*	267.856*	0.002	106438507
LOC106444749	NC_063434	9426010..9426759	9.557	11.978*	4,034.427*	0.000	106444749
LOC106444760	NC_063434	9432964..9433714	0.544	7.845*	229.956*	0.002	106444760
LOC106449778	NC_063434	9438432..9439205	0.996	2.995	7.972	0.000	106449778
LOC106449768	NC_063434	9446934..9447723	0.814	8.497*	361.171*	0.001	106449768
LOC106449756	NC_063434	9459949..9460736	1.195	9.056*	532.144*	0.000	106449756
LOC106446315	NC_063434	complement(10827375..10828131)	2.810	10.237*	1,206.950*	0.000	106446315
LOC106360571	NC_063434	complement(13610412..13613406)	33.426	-1.375	-2.593	0.000	106360571
LOC106357280	NC_063435	complement(2406782..2410507)	0.895	4.857	28.982	0.000	106357280
LOC106380186	NC_063435	complement(12054285..12057345)	0.821	3.865	14.567	0.000	106380186
LOC106351371	NC_063435	21209563..21212544	0.321	1.864	3.640	0.004	106351371
LOC106402246	NC_063435	complement(25010951..25013155)	0.450	8.307*	316.638*	0.001	106402246
LOC106433705	NC_063436	complement(3503499..3504261)	3.210	10.423*	1,372.510*	0.000	106433705
BNAA03G06950D	NC_063436	complement(3503499..3509117)	6.967	-1.359	-2.564	0.000	106433689
LOC106443480	NC_063436	complement(8154068..8157106)	1.035	3.234	9.408	0.000	106443480
LOC106415391	NC_063436	20041454..20042869	0.257	7.657*	201.796*	0.003	106415391
LOC106425233	NC_063436	complement(23381846..23383242)	0.230	3.776	13.698	0.038	106425233
LOC106440946	NC_063436	27235097..27235864	0.125	5.739*	53.399*	0.048	106440946
LOC106440948	NC_063436	27247093..27247791	0.749	5.622	49.248	0.000	106440948
LOC106442865	NC_063436	complement(30359840..30362626)	60.258	16.509*	93,246.548*	0.000	106442865
LOC106445042	NC_063437	800567..803171	0.707	-3.784	-13.775	0.010	106445042
LOC106449078	NC_063437	815275..817968	1.218	-2.369	-5.165	0.001	106449078
LOC111215526	NC_063438	complement(2903636..2908068)	0.319	4.684	25.714	0.000	111215526
LOC106351561	NC_063438	5864540..5866995	0.115	2.089	4.254	0.027	106351561
LOC125608921	NC_063438	complement(21387911..21389764)	0.433	8.401*	338.100*	0.001	125608921
LOC125609558	NC_063438	complement(21391622..21393659)	2.211	-1.927	-3.802	0.001	125609558
LOC125594318	NW_026014040	complement(32656..34353)	0.915	5.651	50.245	0.000	125594318
LOC106349654	NC_063439	1446994..1451735	0.640	-2.670	-6.362	0.001	106349654
LOC106346237	NC_063439	3781998..3784686	2.427	1.271	2.413	0.000	106346237
LOC106428928	NC_063439	complement(10645599..10647455)	0.362	8.038*	262.835*	0.002	106428928
LOC106349544	NC_063439	28397037..28399408	45.100	1.660	3.160	0.000	106349544
LOC106356333	NC_063440	10806170..10809806	1.359	8.267	307.940	0.000	106356333
LOC106358189	NC_063440	12740337..12742203	0.618	7.897*	238.416*	0.002	106358189
LOC106371867	NC_063441	4088362..4091825	0.860	2.172	4.505	0.000	106371867
LOC106418025	NC_063442	28762193..28770729	0.122	8.692*	413.592*	0.001	106418025
LOC106454772	NC_063442	31912956..31915575	0.417	8.064*	267.679*	0.002	106454772
LOC106369101	NC_063442	41918437..41920392	0.438	5.360	41.071	0.000	106369101
LOC106414084	NC_063442	complement(42590860..42592657)	0.637	-5.646	-50.067	0.045	106414084
LOC106370068	NC_063443	complement(371221..373116)	2.458	-2.803	-6.978	0.000	106370068
LOC106454047	NC_063443	3872077..3874571	2.472	-2.704	-6.516	0.000	106454047
LOC106371512	NC_063443	11125652..11128123	0.133	7.087*	135.999*	0.010	106371512
LOC106385624	NC_063443	14877552..14881001	0.734	7.122	139.333	0.000	106385624
LOC106426780	NC_063444	complement(886594..889848)	0.378	4.492	22.503	0.000	106426780
LOC106369747	NC_063444	complement(922003..923897)	0.819	4.958	31.083	0.000	106369747
LOC106365207	NC_063444	2895657..2896220	0.318	6.716*	105.092*	0.017	106365207
LOC106437649	NC_063444	complement(10178386..10186176)	14.813	-1.248	-2.375	0.000	106437649
LOC106436546	NC_063444	complement(11814871..11820633)	0.033	6.637*	99.521*	0.017	106436546
LOC106445652	NC_063444	15196473..15197220	5.444	7.429	172.269	0.000	106445652
LOC106445672	NC_063444	15209069..15209845	1.150	5.534	46.327	0.000	106445672
LOC106445681	NC_063444	15216983..15217764	0.523	7.837*	228.621*	0.002	106445681
LOC106391998	NC_063444	complement(17371966..17372726)	14.004	12.545*	5,975.694*	0.000	106391998
LOC106430395	NC_063444	complement(32853879..32854627)	8.634	11.823*	3,623.655*	0.000	106430395
LOC125580263	NC_063444	complement(40862700..40864932)	0.943	1.828	3.551	0.000	125580263
LOC106425829	NC_063445	4477073..4479830	2.630	2.265	4.808	0.000	106425829
LOC106431716	NC_063445	complement(5953564..5956129)	8.764	-4.553	-23.473	0.000	106431716
LOC106371587	NC_063445	complement(40504265..40506624)	64.749	2.792	6.925	0.000	106371587
LOC106380253	NC_063445	44508632..44510666	0.209	4.841	28.664	0.000	106380253
LOC106347726	NC_063445	complement(50713853..50716757)	0.121	7.030*	130.699*	0.008	106347726
LOC106386551	NC_063446	complement(4470048..4470821)	13.280	12.490*	5,750.703*	0.000	106386551
LOC106386976	NC_063446	5412195..5414941	6.635	-1.584	-2.998	0.000	106386976
LOC106385562	NC_063446	complement(10691837..10695317)	4.046	4.222	18.664	0.000	106385562
LOC106389674	NC_063446	32665851..32667860	0.324	2.157	4.460	0.000	106389674
LOC106395191	NC_063446	complement(60676225..60678858)	1.707	-3.817	-14.097	0.000	106395191
LOC106396387	NC_063447	complement(20567958..20570441)	34.331	1.219	2.329	0.000	106396387
LOC106402213	NC_063448	426960..428918	0.093	6.662*	101.291*	0.014	106402213
LOC106400902	NC_063448	4040763..4043488	2.317	1.001	2.001	0.001	106400902
LOC125586844	NC_063448	complement(19653055..19657416)	0.232	7.897*	238.318*	0.002	125586844
LOC106397742	NC_063448	complement(42776640..42778408)	0.165	4.243	18.931	0.001	106397742
LOC106416630	NC_063448	complement(44090740..44092820)	0.763	1.706	3.263	0.001	106416630
LOC106395640	NC_063450	21951889..21956784	0.408	8.662*	405.017*	0.001	106395640
LOC106425624	NC_063450	26425187..26427077	0.395	7.322*	160.030*	0.006	106425624
LOC106409358	NC_063450	50591555..50592254	0.261	6.735*	106.540*	0.015	106409358
LOC106436712	NC_063450	complement(53104306..53107331)	110.843	17.498*	185,064.463*	0.000	106436712
LOC106405852	NC_063451	6956955..6959485	5.153	3.570	11.874	0.000	106405852
LOC106412430	NC_063451	23284561..23285328	0.555	3.766	13.607	0.000	106412430
LOC106444219	NC_063451	32369079..32370924	0.356	4.942	30.743	0.000	106444219
LOC106368143	NC_063451	39629582..39632740	7.389	-2.900	-7.465	0.000	106368143
LOC106412358	NC_063451	46286747..46288802	0.336	5.446	43.590	0.000	106412358
LOC106418177	NC_063452	23671223..23674087	0.163	2.286	4.877	0.003	106418177
LOC106439153	NC_063452	30496580..30498670	2.056	1.034	2.048	0.004	106439153
LOC106429986	NC_063452	complement(45042385..45044225)	0.081	5.710*	52.331*	0.043	106429986
LOC106426170	NC_063452	56612350..56615857	0.876	3.896	14.890	0.000	106426170
LOC106385524	NW_026014799	24861..26805	0.222	7.769*	218.183*	0.004	106385524
LOC125600334	NW_026015605	36248..39229	0.372	2.459	5.498	0.000	125600334
Comparison D4+PSK vs. D4-PSK: 15 DEG
Name	Chromosome	Region	Max group mean	Log₂ fold change	Fold change	FDR p-value	GeneID with hyperlink to NCBI	Description in NCBI
LOC106449756	NC_063434	9459949..9460736	1.489	2.663	6.334	0.004	106449756	napin-like
LOC106433705	NC_063436	complement(3503499..3504261)	2.078	1.588	3.005	0.044	106433705	napin embryo-specific
LOC106430395	NC_063444	complement(32853879..32854627)	13.660	1.128	2.186	0.002	106430395	napin-like
LOC106425829	NC_063445	4477073..4479830	35.144	-1.070	-2.099	0.000	106425829	leucine-rich repeat protein 1
LOC106365204	NC_063444	2887882..2889500	7.789	-1.273	-2.417	0.000	106365204	uncharacterized LOC106365204
BNAA01G03700D	NC_063434	2451607..2451995	102.397	-1.361	-2.568	0.000	106438507	uncharacterized BNAA01G03700D
LOC106365207	NC_063444	2895657..2896220	24.419	-1.420	-2.677	0.000	106365207	uncharacterized LOC106365207
LOC106369101	NC_063442	41918437..41920392	23.895	-1.446	-2.724	0.000	106369101	cytochrome P450 78A5-like
BNAC01G05050D	NC_063444	2881418..2881931	24.097	-1.518	-2.864	0.000	106365203	uncharacterized BNAC01G05050D
LOC106374705	NC_063446	complement(60803001..60805054)	1.042	-1.553	-2.935	0.029	106374705	cysteine proteinase COT44-like
LOC106363719	NC_063444	2880059..2880381	22.967	-1.639	-3.115	0.000	106363719	uncharacterized LOC106363719
LOC106415391	NC_063436	20041454..20042869	1.658	-1.784	-3.444	0.002	106415391	glycine-rich protein 5-like
LOC106389674	NC_063446	32665851..32667860	1.166	-1.890	-3.706	0.001	106389674	uncharacterized PE-PGRS family protein PE_PGRS46-like
LOC106371512	NC_063443	11125652..11128123	0.596	-1.993	-3.982	0.032	106371512	cytochrome P450 81F2-like
LOC106402213	NC_063448	426960..428918	2.761	-2.836	-7.141	0.000	106402213	cytochrome P450 78A6
Comparison D4-PSK vs. D0: 106 DEG
Name	Chromosome	Region	Max group mean	Log₂ fold change	Fold change	FDR p-value	GeneID with hyperlink to NCBI
BNAA01G03700D	NC_063434	2451607..2451995	102.397	14.375*	21,242.109*	0.000	106438507
LOC106441978	NC_063434	2452947..2453295	4.065	9.568*	758.923*	0.000	106441978
LOC106438505	NC_063434	2453928..2454641	0.272	6.781*	109.951*	0.013	106438505
LOC106444749	NC_063434	9426010..9426759	15.913	12.646*	6,410.419*	0.000	106444749
LOC106444760	NC_063434	9432964..9433714	0.381	7.289*	156.380*	0.006	106444760
LOC106449768	NC_063434	9446934..9447723	0.246	6.785*	110.315*	0.015	106449768
LOC106449756	NC_063434	9459949..9460736	0.223	6.668*	101.689*	0.017	106449756
LOC106446315	NC_063434	complement(10827375..10828131)	3.102	10.325*	1,283.000*	0.000	106446315
LOC106434068	NC_063434	21412682..21416182	0.082	5.470	44.330	0.001	106434068
LOC106409762	NC_063435	complement(2164118..2168405)	1.831	11.494*	2,884.404*	0.000	106409762
LOC106357280	NC_063435	complement(2406782..2410507)	7.761	7.916	241.487	0.000	106357280
LOC106380186	NC_063435	complement(12054285..12057345)	0.395	2.733	6.649	0.000	106380186
LOC106351371	NC_063435	21209563..21212544	0.638	2.827	7.094	0.000	106351371
LOC106402246	NC_063435	complement(25010951..25013155)	3.697	11.243*	2,422.897*	0.000	106402246
LOC106433705	NC_063436	complement(3503499..3504261)	0.679	8.133*	280.722*	0.001	106433705
BNAA03G06950D	NC_063436	complement(3503499..3509117)	6.967	-2.024	-4.067	0.000	106433689
LOC106435068	NC_063436	4242414..4245062	2.121	1.089	2.128	0.002	106435068
LOC106436552	NC_063436	complement(5280364..5282914)	0.144	2.711	6.548	0.011	106436552
LOC106443480	NC_063436	complement(8154068..8157106)	0.988	3.109	8.628	0.000	106443480
LOC106415391	NC_063436	20041454..20042869	1.658	10.295*	1,256.457*	0.000	106415391
LOC125607048	NC_063436	complement(20170748..20173663)	0.652	1.494	2.817	0.000	125607048
LOC106361788	NC_063436	20263232..20267032	0.365	3.386	10.457	0.000	106361788
LOC106440948	NC_063436	27247093..27247791	0.230	3.904	14.970	0.007	106440948
LOC106442865	NC_063436	complement(30359840..30362626)	108.014	17.293*	160,638.382*	0.000	106442865
LOC106449078	NC_063437	815275..817968	1.218	-6.606	-97.394	0.015	106449078
LOC111215526	NC_063438	complement(2903636..2908068)	0.082	2.723	6.601	0.009	111215526
LOC106351561	NC_063438	5864540..5866995	1.230	5.298	39.354	0.000	106351561
LOC125608921	NC_063438	complement(21387911..21389764)	0.418	8.320*	319.647*	0.001	125608921
LOC125594318	NW_026014040	complement(32656..34353)	0.335	4.090	17.035	0.000	125594318
LOC106349654	NC_063439	1446994..1451735	0.640	-6.671	-101.886	0.014	106349654
LOC106428928	NC_063439	complement(10645599..10647455)	1.928	10.349*	1,303.928*	0.000	106428928
LOC106349544	NC_063439	28397037..28399408	50.589	1.989	3.970	0.000	106349544
LOC106356333	NC_063440	10806170..10809806	5.993	10.318	1,276.667	0.000	106356333
LOC106358189	NC_063440	12740337..12742203	7.558	11.441*	2,780.753*	0.000	106358189
LOC106371867	NC_063441	4088362..4091825	0.982	2.276	4.843	0.000	106371867
LOC106361414	NC_063441	16515749..16517802	0.425	3.871	14.635	0.000	106361414
LOC106425936	NC_063441	19486060..19486437	0.237	5.677*	51.150*	0.047	106425936
LOC106359386	NC_063441	22544920..22546450	0.518	8.360*	328.481*	0.001	106359386
LOC106418025	NC_063442	28762193..28770729	0.489	10.585*	1,536.032*	0.000	106418025
LOC106454772	NC_063442	31912956..31915575	6.256	11.835*	3,653.211*	0.000	106454772
LOC106369101	NC_063442	41918437..41920392	23.895	11.068	2,147.268	0.000	106369101
LOC106419874	NC_063442	complement(43819368..43821128)	0.243	7.192*	146.237*	0.008	106419874
LOC106363855	NC_063442	44083683..44085210	0.281	7.864*	232.897*	0.002	106363855
LOC106370068	NC_063443	complement(371221..373116)	2.458	-3.955	-15.505	0.000	106370068
LOC106371147	NC_063443	2579658..2581087	0.084	5.677*	51.152*	0.048	106371147
LOC106454047	NC_063443	3872077..3874571	2.472	-1.589	-3.008	0.002	106454047
LOC106371512	NC_063443	11125652..11128123	0.596	9.124*	558.046*	0.000	106371512
LOC106420426	NC_063443	complement(12106250..12108186)	0.159	6.621*	98.462*	0.018	106420426
LOC106385624	NC_063443	14877552..14881001	6.331	10.118	1,111.162	0.000	106385624
LOC106426780	NC_063444	complement(886594..889848)	0.165	3.205	9.223	0.003	106426780
LOC106369747	NC_063444	complement(922003..923897)	0.514	4.215	18.574	0.000	106369747
LOC106363719	NC_063444	2880059..2880381	22.967	11.949*	3,953.125*	0.000	106363719
BNAC01G05050D	NC_063444	2881418..2881931	24.097	12.688*	6,598.667*	0.000	106365203
LOC106365204	NC_063444	2887882..2889500	7.789	12.705*	6,678.320*	0.000	106365204
LOC106365207	NC_063444	2895657..2896220	24.419	12.838*	7,322.770*	0.000	106365207
LOC106437649	NC_063444	complement(10178386..10186176)	14.813	-3.189	-9.121	0.000	106437649
LOC106436546	NC_063444	complement(11814871..11820633)	0.020	5.960*	62.271*	0.040	106436546
LOC106445652	NC_063444	15196473..15197220	3.824	6.835	114.178	0.000	106445652
LOC106445672	NC_063444	15209069..15209845	0.208	3.030	8.167	0.028	106445672
LOC106445681	NC_063444	15216983..15217764	0.298	6.996*	127.669*	0.011	106445681
LOC106391998	NC_063444	complement(17371966..17372726)	11.578	12.214*	4,750.075*	0.000	106391998
LOC106430395	NC_063444	complement(32853879..32854627)	6.090	11.276*	2,479.321*	0.000	106430395
LOC125580263	NC_063444	complement(40862700..40864932)	0.943	1.665	3.171	0.000	125580263
LOC125581296	NC_063445	complement(3212118..3216421)	0.084	7.101*	137.276*	0.008	125581296
LOC106425829	NC_063445	4477073..4479830	35.144	5.916	60.366	0.000	106425829
LOC106431716	NC_063445	complement(5953564..5956129)	8.764	-2.739	-6.676	0.000	106431716
LOC106417355	NC_063445	6685087..6687127	0.134	4.464	22.070	0.004	106417355
LOC106371587	NC_063445	complement(40504265..40506624)	89.915	3.190	9.125	0.000	106371587
LOC106380253	NC_063445	44508632..44510666	0.659	6.410	85.064	0.000	106380253
LOC106347726	NC_063445	complement(50713853..50716757)	0.394	8.696*	414.602*	0.000	106347726
LOC106386551	NC_063446	complement(4470048..4470821)	5.267	11.116*	2,220.175*	0.000	106386551
LOC106386553	NC_063446	complement(4470048..4475692)	6.632	-1.232	-2.348	0.000	106386553
LOC106385562	NC_063446	complement(10691837..10695317)	6.231	4.773	27.344	0.000	106385562
LOC106358162	NC_063446	28585436..28586822	0.672	8.968*	500.720*	0.000	106358162
LOC106389674	NC_063446	32665851..32667860	1.166	3.921	15.150	0.000	106389674
LOC106418223	NC_063446	33330253..33333052	0.318	3.357	10.247	0.000	106418223
LOC106395191	NC_063446	complement(60676225..60678858)	1.707	-4.378	-20.796	0.000	106395191
LOC106374705	NC_063446	complement(60803001..60805054)	1.042	7.820	225.939	0.000	106374705
LOC106379486	NC_063447	11179295..11181993	1.427	4.664	25.352	0.000	106379486
LOC106396387	NC_063447	complement(20567958..20570441)	34.331	1.312	2.482	0.000	106396387
LOC106402213	NC_063448	426960..428918	2.761	11.438*	2,775.176*	0.000	106402213
LOC106401417	NC_063448	complement(1612712..1613579)	0.105	5.677*	51.147*	0.047	106401417
LOC106399393	NC_063448	2302824..2304836	0.140	6.519*	91.708*	0.022	106399393
LOC106380989	NC_063448	complement(6353963..6355957)	0.398	6.084	67.823	0.000	106380989
LOC125575342	NC_063448	complement(13728954..13729598)	1.310	8.823*	452.845*	0.000	125575342
LOC125587811	NC_063448	15848089..15856885	0.051	4.443	21.751	0.000	125587811
LOC125586844	NC_063448	complement(19653055..19657416)	1.454	10.409*	1,359.343*	0.000	125586844
LOC106397742	NC_063448	complement(42776640..42778408)	0.149	4.020	16.220	0.002	106397742
LOC106416630	NC_063448	complement(44090740..44092820)	1.130	2.379	5.203	0.000	106416630
LOC106395640	NC_063450	21951889..21956784	2.452	11.217*	2,380.734*	0.000	106395640
LOC106425624	NC_063450	26425187..26427077	6.562	11.242*	2,421.733*	0.000	106425624
LOC106409497	NC_063450	complement(38995154..38997722)	0.052	5.699*	51.940*	0.048	106409497
LOC106352247	NC_063450	complement(41937385..41938929)	30.592	-1.562	-2.954	0.000	106352247
LOC106409358	NC_063450	50591555..50592254	0.616	7.863*	232.873*	0.002	106409358
LOC106436712	NC_063450	complement(53104306..53107331)	211.290	18.377*	340,358.484*	0.000	106436712
LOC106405852	NC_063451	6956955..6959485	6.431	3.821	14.130	0.000	106405852
LOC106444219	NC_063451	32369079..32370924	1.851	7.181	145.134	0.000	106444219
LOC106368143	NC_063451	39629582..39632740	7.389	-2.589	-6.017	0.000	106368143
LOC106412358	NC_063451	46286747..46288802	24.692	11.550	2,998.223	0.000	106412358
LOC106439153	NC_063452	30496580..30498670	3.209	2.440	5.427	0.000	106439153
LOC106397759	NC_063452	48368918..48371421	1.313	10.292*	1,253.391*	0.000	106397759
LOC125593043	NC_063452	complement(50527141..50528869)	0.267	3.904	14.969	0.003	125593043
LOC106421350	NC_063452	complement(53441021..53443886)	5.436	2.003	4.009	0.000	106421350
LOC106426170	NC_063452	56612350..56615857	9.406	7.262	153.450	0.000	106426170
LOC106385524	NW_026014799	24861..26805	0.051	5.677*	51.152*	0.044	106385524
LOC125600334	NW_026015605	36248..39229	0.585	3.019	8.108	0.000	125600334
Comparison D4+PSK vs. D0: 108 DEG
Name	Chromosome	Region	Max group mean	Log₂ fold change	Fold change	FDR p-value	GeneID with hyperlink to NCBI
LOC106414084	NC_063442	complement(42590860..42592657)	0.637	-5.760	-54.192	0.032	106414084
LOC106449078	NC_063437	815275..817968	1.218	-4.792	-27.698	0.000	106449078
LOC106431716	NC_063445	complement(5953564..5956129)	8.764	-4.450	-21.855	0.000	106431716
LOC106349654	NC_063439	1446994..1451735	0.640	-4.068	-16.767	0.000	106349654
LOC106412912	NC_063451	23793375..23799459	0.656	-3.799	-13.917	0.008	106412912
LOC106368143	NC_063451	39629582..39632740	7.389	-3.534	-11.579	0.000	106368143
LOC106395191	NC_063446	complement(60676225..60678858)	1.707	-3.348	-10.183	0.000	106395191
LOC106437649	NC_063444	complement(10178386..10186176)	14.813	-2.972	-7.844	0.000	106437649
LOC106370068	NC_063443	complement(371221..373116)	2.458	-2.608	-6.097	0.000	106370068
LOC106454047	NC_063443	3872077..3874571	2.472	-1.950	-3.863	0.000	106454047
BNAA03G06950D	NC_063436	complement(3503499..3509117)	6.967	-1.873	-3.664	0.000	106433689
LOC106445042	NC_063437	800567..803171	0.707	-1.756	-3.377	0.034	106445042
LOC106352247	NC_063450	complement(41937385..41938929)	30.592	-1.437	-2.707	0.000	106352247
LOC106386976	NC_063446	5412195..5414941	6.635	-1.188	-2.278	0.000	106386976
LOC111212644	NC_063444	complement(40917525..40919574)	29.064	1.026	2.036	0.000	111212644
LOC106403563	NC_063434	complement(840774..842936)	1.109	1.370	2.585	0.002	106403563
LOC106396387	NC_063447	complement(20567958..20570441)	34.331	1.407	2.653	0.000	106396387
LOC106421350	NC_063452	complement(53441021..53443886)	5.068	1.895	3.720	0.000	106421350
LOC125607048	NC_063436	complement(20170748..20173663)	0.785	2.033	4.092	0.000	125607048
LOC125580263	NC_063444	complement(40862700..40864932)	1.132	2.035	4.097	0.000	125580263
LOC106389674	NC_063446	32665851..32667860	0.314	2.058	4.163	0.002	106389674
LOC106349544	NC_063439	28397037..28399408	55.081	2.092	4.263	0.000	106349544
LOC106418177	NC_063452	23671223..23674087	0.170	2.269	4.820	0.002	106418177
LOC106439153	NC_063452	30496580..30498670	3.074	2.360	5.134	0.000	106439153
LOC106361788	NC_063436	20263232..20267032	0.184	2.418	5.346	0.000	106361788
LOC106371867	NC_063441	4088362..4091825	1.130	2.475	5.560	0.000	106371867
LOC106351371	NC_063435	21209563..21212544	0.593	2.727	6.623	0.000	106351371
LOC106416630	NC_063448	complement(44090740..44092820)	1.470	2.750	6.728	0.000	106416630
LOC106380186	NC_063435	complement(12054285..12057345)	0.421	2.854	7.232	0.000	106380186
LOC106449778	NC_063434	9438432..9439205	1.010	2.936	7.653	0.000	106449778
LOC125600334	NW_026015605	36248..39229	0.564	2.977	7.875	0.000	125600334
LOC106418223	NC_063446	33330253..33333052	0.260	3.039	8.221	0.000	106418223
LOC106443480	NC_063436	complement(8154068..8157106)	1.050	3.202	9.200	0.000	106443480
LOC106371587	NC_063445	complement(40504265..40506624)	98.998	3.312	9.932	0.000	106371587
LOC111215526	NC_063438	complement(2903636..2908068)	0.148	3.540	11.635	0.000	111215526
LOC106361414	NC_063441	16515749..16517802	0.352	3.564	11.827	0.001	106361414
LOC106426780	NC_063444	complement(886594..889848)	0.222	3.654	12.590	0.000	106426780
LOC106412430	NC_063451	23284561..23285328	0.586	3.724	13.216	0.000	106412430
LOC106417355	NC_063445	6685087..6687127	0.082	3.758	13.525	0.013	106417355
LOC106405852	NC_063451	6956955..6959485	6.336	3.769	13.630	0.000	106405852
LOC106379486	NC_063447	11179295..11181993	0.816	3.843	14.352	0.000	106379486
LOC125587811	NC_063448	15848089..15856885	0.036	3.988	15.868	0.001	125587811
LOC106369747	NC_063444	complement(922003..923897)	0.533	4.229	18.750	0.000	106369747
LOC106440948	NC_063436	27247093..27247791	0.386	4.648	25.069	0.000	106440948
LOC125594318	NW_026014040	complement(32656..34353)	0.498	4.696	25.918	0.000	125594318
LOC106385562	NC_063446	complement(10691837..10695317)	6.233	4.758	27.053	0.000	106385562
LOC106425829	NC_063445	4477073..4479830	16.839	4.847	28.776	0.000	106425829
LOC106346553	NC_063439	complement(5358555..5360529)	0.102	4.856	28.956	0.007	106346553
LOC106379955	NW_026015135	13989..18250	0.119	4.920	30.269	0.010	106379955
LOC106351561	NC_063438	5864540..5866995	1.034	5.057	33.288	0.000	106351561
LOC106445672	NC_063444	15209069..15209845	0.894	5.088	34.022	0.000	106445672
LOC106380989	NC_063448	complement(6353963..6355957)	0.265	5.501	45.287	0.000	106380989
LOC106385524	NW_026014799	24861..26805	0.056	5.843*	57.410*	0.045	106385524
LOC106380253	NC_063445	44508632..44510666	0.520	6.033	65.494	0.000	106380253
LOC106371147	NC_063443	2579658..2581087	0.107	6.052*	66.333*	0.033	106371147
LOC106401417	NC_063448	complement(1612712..1613579)	0.130	6.052*	66.333*	0.033	106401417
LOC106361837	NC_063435	4091947..4095531	0.037	6.105*	68.840*	0.038	106361837
LOC106374705	NC_063446	complement(60803001..60805054)	0.350	6.286	78.039	0.000	106374705
LOC106365206	NC_063444	2889203..2889500	0.517	6.510*	91.120*	0.023	106365206
LOC106438505	NC_063434	2453928..2454641	0.228	6.545*	93.403*	0.022	106438505
LOC106399393	NC_063448	2302824..2304836	0.152	6.613*	97.876*	0.020	106399393
LOC125581296	NC_063445	complement(3212118..3216421)	0.071	6.902*	119.601*	0.013	125581296
LOC106358162	NC_063446	28585436..28586822	0.169	7.022*	129.923*	0.011	106358162
LOC106371512	NC_063443	11125652..11128123	0.147	7.202*	147.245*	0.008	106371512
LOC106359386	NC_063441	22544920..22546450	0.241	7.348*	162.865*	0.007	106359386
LOC106409358	NC_063450	50591555..50592254	0.412	7.368*	165.199*	0.006	106409358
LOC106426170	NC_063452	56612350..56615857	10.860	7.457	175.671	0.000	106426170
LOC106444219	NC_063451	32369079..32370924	2.328	7.511	182.392	0.000	106444219
LOC106445652	NC_063444	15196473..15197220	7.786	7.843	229.616	0.000	106445652
LOC106357280	NC_063435	complement(2406782..2410507)	8.598	8.039	263.074	0.000	106357280
LOC106429986	NC_063452	complement(45042385..45044225)	0.435	8.063*	267.443*	0.002	106429986
LOC106449768	NC_063434	9446934..9447723	0.622	8.095*	273.429*	0.002	106449768
LOC106445681	NC_063444	15216983..15217764	0.725	8.315*	318.405*	0.001	106445681
LOC106347726	NC_063445	complement(50713853..50716757)	0.290	8.323*	320.264*	0.002	106347726
LOC106441978	NC_063434	2452947..2453295	1.783	8.469*	354.354*	0.001	106441978
LOC125608921	NC_063438	complement(21387911..21389764)	0.470	8.551*	375.103*	0.001	125608921
LOC106415391	NC_063436	20041454..20042869	0.474	8.562*	378.029*	0.001	106415391
LOC106402213	NC_063448	426960..428918	0.389	8.674*	408.476*	0.001	106402213
LOC106444760	NC_063434	9432964..9433714	1.040	8.779*	439.357*	0.001	106444760
LOC125575342	NC_063448	complement(13728954..13729598)	1.367	8.956*	496.759*	0.000	125575342
LOC106397759	NC_063452	48368918..48371421	0.526	9.031*	523.052*	0.000	106397759
LOC106449756	NC_063434	9459949..9460736	1.489	9.367*	660.389*	0.000	106449756
LOC106369101	NC_063442	41918437..41920392	8.858	9.630	792.459	0.000	106369101
LOC106428928	NC_063439	complement(10645599..10647455)	1.254	9.791*	885.624*	0.000	106428928
LOC106433705	NC_063436	complement(3503499..3504261)	2.078	9.794*	887.710*	0.000	106433705
LOC106385624	NC_063443	14877552..14881001	6.121	10.082	1,083.828	0.000	106385624
LOC125586844	NC_063448	complement(19653055..19657416)	1.307	10.343*	1,298.969*	0.000	125586844
LOC106363719	NC_063444	2880059..2880381	7.435	10.383*	1,335.807*	0.000	106363719
LOC106356333	NC_063440	10806170..10809806	6.622	10.468	1,416.194	0.000	106356333
LOC106402246	NC_063435	complement(25010951..25013155)	2.274	10.592*	1,543.542*	0.000	106402246
LOC106425624	NC_063450	26425187..26427077	4.064	10.619*	1,572.274*	0.000	106425624
LOC106418025	NC_063442	28762193..28770729	0.481	10.626*	1,580.007*	0.000	106418025
LOC106412358	NC_063451	46286747..46288802	13.294	10.654	1,611.143	0.000	106412358
LOC106358189	NC_063440	12740337..12742203	5.165	10.964*	1,997.504*	0.000	106358189
LOC106395640	NC_063450	21951889..21956784	2.142	11.074*	2,155.571*	0.000	106395640
LOC106446315	NC_063434	complement(10827375..10828131)	5.403	11.156*	2,282.476*	0.000	106446315
BNAC01G05050D	NC_063444	2881418..2881931	8.523	11.247*	2,430.337*	0.000	106365203
LOC106454772	NC_063442	31912956..31915575	4.245	11.361*	2,630.323*	0.000	106454772
LOC106365207	NC_063444	2895657..2896220	9.131	11.487*	2,869.877*	0.000	106365207
LOC106365204	NC_063444	2887882..2889500	3.230	11.511*	2,919.045*	0.000	106365204
LOC106409762	NC_063435	complement(2164118..2168405)	2.554	12.029*	4,178.629*	0.000	106409762
LOC106386551	NC_063446	complement(4470048..4470821)	10.442	12.128*	4,477.416*	0.000	106386551
LOC106391998	NC_063444	complement(17371966..17372726)	12.853	12.413*	5,452.808*	0.000	106391998
LOC106430395	NC_063444	complement(32853879..32854627)	13.660	12.475*	5,692.427*	0.000	106430395
LOC106444749	NC_063434	9426010..9426759	18.147	12.884*	7,558.389*	0.000	106444749
BNAA01G03700D	NC_063434	2451607..2451995	40.125	13.085*	8,688.095*	0.000	106438507
LOC106442865	NC_063436	complement(30359840..30362626)	118.344	17.484*	183,330.022*	0.000	106442865
LOC106436712	NC_063450	complement(53104306..53107331)	258.935	18.733*	435,586.405*	0.000	106436712

## Sheet: Table S7
Supplementary Material
Table S7: Differentially expressed embryogenesis related genes at various time points (D0, D2, D4) and treatments (-PSK and +PSK).
Expression results were subjected to filtering criterions FDR p-value of ≤ 0.05 and an absolute fold change exceeding 2.
Certain genes showed no detectable expression in control samples. Fold change and Log₂ fold change values, calculated to assess such differential expression, are denoted by asterisks (*).
Comparison D2+PSK vs. D2-PSK: 3 DEG
Name	Chromosome	Region	Max group mean	Log₂ fold change	Fold change	FDR p-value	GeneID with hyperlink to NCBI	Gene name	Reference	Description in NCBI
LOC106412358	NC_063451	46286747..46288802	1.168	-1.821	-3.533	0.003	106412358	CYP78A5	Joosen et al., 2007; Soriano et al., 2013; Corral-Martínez et al., 2020	cytochrome P450 78A5-like
LOC106442906	NC_063447	complement(10251535..10252424)	3.424	-1.863	-3.638	0.000	106442906	MEE26	Joosen et al., 2007; Soriano et al., 2013; Corral-Martínez et al., 2020	follicular dendritic cell secreted peptide
LOC125585666	NC_063447	59327200..59328111	8.860	-2.316	-4.981	0.000	125585666	LTP	Joosen et al., 200	non-specific lipid-transfer protein B
Comparison D2-PSK vs. D0: 108 DEG
Name	Chromosome	Region	Max group mean	Log₂ fold change	Fold change	FDR p-value	GeneID with hyperlink to NCBI	Gene name	Reference	Description in NCBI
LOC106431084	NC_063446	complement(3180038..3182150)	4.400	2.128	4.372	0.000	106431084	AGL15	Perry et al., 1996; Corral-Martínez et al., 2020	agamous-like MADS-box protein AGL15
LOC125579041	NC_063443	15990626..15992642	0.734	2.573	5.950	0.000	125579041	AGL15	Perry et al., 1996; Corral-Martínez et al., 2020	agamous-like MADS-box protein AGL15
LOC125593423	NC_063436	complement(2475847..2478062)	1.786	2.718	6.578	0.000	125593423	AGL15	Perry et al., 1996; Corral-Martínez et al., 2020	agamous-like MADS-box protein AGL15
LOC106384351	NC_063446	complement(29392089..29393980)	0.660	-2.745	-6.704	0.006	106384351	AGL53	Joosen et al., 2007	agamous-like MADS-box protein AGL103
LOC106393501	NC_063444	41583562..41587978	0.544	-3.669	-12.722	0.000	106393501	AGL53	Joosen et al., 2007	agamous-like MADS-box protein AGL103
LOC111204645	NC_063449	4781371..4785891	2.761	-3.078	-8.444	0.000	111204645	AGL53	Joosen et al., 2007	agamous-like MADS-box protein AGL53
LOC106448306	NC_063437	complement(9959510..9961300)	0.421	-3.284	-9.737	0.029	106448306	AGL53	Joosen et al., 2007	agamous-like MADS-box protein AGL75
LOC106448308	NC_063437	complement(9968499..9970533)	0.582	-2.017	-4.048	0.019	106448308	AGL53	Joosen et al., 2007	agamous-like MADS-box protein AGL75
LOC106384892	NC_063446	2330682..2335249	2.780	4.362	20.568	0.000	106384892	AIL5	Seifert et al., 2016 (wheat)	AP2-like ethylene-responsive transcription factor AIL6
LOC106346792	NC_063439	6456999..6459962	8.100	-5.050	-33.122	0.000	106346792	AIL5	Seifert et al., 2016 (wheat)	AP2-like ethylene-responsive transcription factor At1g16060
LOC106392431	NC_063448	8240191..8244287	8.658	-2.539	-5.810	0.000	106392431	AIL5	Seifert et al., 2016 (wheat)	AP2-like ethylene-responsive transcription factor At1g16060
LOC106412187	NC_063442	34420744..34424692	15.949	-2.547	-5.843	0.000	106412187	AIL5	Seifert et al., 2016 (wheat)	ethylene-responsive transcription factor WRI1
LOC106352859	NC_063440	16904803..16909525	13.549	-1.386	-2.614	0.000	106352859	AIL5	Seifert et al., 2016 (wheat)	ethylene-responsive transcription factor WRI1-like
LOC106412050	NC_063451	36920085..36923689	5.651	-1.404	-2.647	0.000	106412050	AIL5	Seifert et al., 2016 (wheat)	ethylene-responsive transcription factor WRI1-like
LOC106449641	NC_063435	11514003..11517663	0.620	4.340	20.258	0.000	106449641	BBM	Horstman et al., 2015; Corral-Martínez et al., 2020	AP2-like ethylene-responsive transcription factor AIL1
LOC125582086	NC_063445	23410674..23414123	0.818	4.152	17.782	0.000	125582086	BBM	Horstman et al., 2015; Corral-Martínez et al., 2020	AP2-like ethylene-responsive transcription factor AIL1
LOC106435311	NC_063452	complement(60672801..60677350)	3.101	4.206	18.459	0.000	106435311	BBM	Horstman et al., 2015; Corral-Martínez et al., 2020	AP2-like ethylene-responsive transcription factor AIL6
LOC125579068	NC_063443	complement(17013131..17017719)	0.579	9.753*	862.994*	0.000	125579068	BBM	Horstman et al., 2015; Corral-Martínez et al., 2020	AP2-like ethylene-responsive transcription factor AIL6
LOC125583548	NC_063446	complement(38154451..38157960)	1.295	2.201	4.597	0.000	125583548	BBM	Horstman et al., 2015; Corral-Martínez et al., 2020	AP2-like ethylene-responsive transcription factor AIL7
LOC106407338	NC_063450	54338175..54341120	0.397	-5.339	-40.477	0.049	106407338	BBM	Horstman et al., 2015; Corral-Martínez et al., 2020	AP2-like ethylene-responsive transcription factor ANT
LOC106426170	NC_063452	56612350..56615857	1.312	4.557	23.536	0.000	106426170	BBM	Horstman et al., 2015; Corral-Martínez et al., 2020	AP2-like ethylene-responsive transcription factor BBM1
LOC106357280	NC_063435	complement(2406782..2410507)	0.903	4.931	30.512	0.000	106357280	BBM	Horstman et al., 2015; Corral-Martínez et al., 2020	AP2-like ethylene-responsive transcription factor BBM2
LOC106385624	NC_063443	14877552..14881001	0.867	7.409	169.940	0.000	106385624	BBM	Horstman et al., 2015; Corral-Martínez et al., 2020	AP2-like ethylene-responsive transcription factor BBM2
LOC106409762	NC_063435	complement(2164118..2168405)	0.100	7.527*	184.400*	0.009	106409762	BBM	Horstman et al., 2015; Corral-Martínez et al., 2020	AP2-like ethylene-responsive transcription factor BBM2
LOC106369101	NC_063442	41918437..41920392	1.097	6.734	106.481	0.000	106369101	CYP78A5	Joosen et al., 2007; Soriano et al., 2013; Corral-Martínez et al., 2020	cytochrome P450 78A5-like
LOC106412358	NC_063451	46286747..46288802	1.168	7.307	158.373	0.000	106412358	CYP78A5	Joosen et al., 2007; Soriano et al., 2013; Corral-Martínez et al., 2020	cytochrome P450 78A5-like
LOC106356337	NC_063440	10740063..10740880	5.206	2.360	5.134	0.000	106356337	DRN	Cole et al., 2009; Corral-Martínez et al., 2020	ethylene-responsive transcription factor 11
LOC106422025	NC_063442	28671962..28672785	0.933	5.344	40.609	0.000	106422025	DRN	Cole et al., 2009; Corral-Martínez et al., 2020	ethylene-responsive transcription factor 11
LOC111212525	NC_063450	21858234..21858991	1.923	1.188	2.278	0.020	111212525	DRN	Cole et al., 2009; Corral-Martínez et al., 2020	ethylene-responsive transcription factor 11
LOC106454908	NC_063449	complement(9899940..9900958)	2.521	3.581	11.970	0.000	106454908	DRN	Cole et al., 2009; Corral-Martínez et al., 2020	ethylene-responsive transcription factor 4
LOC106402425	NC_063448	complement(48647859..48649034)	3.721	2.742	6.688	0.000	106402425	DRN	Cole et al., 2009; Corral-Martínez et al., 2020	ethylene-responsive transcription factor 4-like
LOC111198776	NC_063434	complement(26314017..26317277)	1.332	1.139	2.203	0.000	111198776	DRN	Cole et al., 2009; Corral-Martínez et al., 2020	ethylene-responsive transcription factor 4-like
LOC125580468	NC_063444	complement(44836210..44837461)	1.448	1.669	3.179	0.000	125580468	DRN	Cole et al., 2009; Corral-Martínez et al., 2020	ethylene-responsive transcription factor 4-like
LOC125597290	NW_026014833	10907..11897	7.244	4.088	17.011	0.000	125597290	DRN	Cole et al., 2009; Corral-Martínez et al., 2020	ethylene-responsive transcription factor 4-like
LOC106357505	NC_063438	20633645..20635444	4.894	3.058	8.330	0.000	106357505	DRN	Cole et al., 2009; Corral-Martínez et al., 2020	ethylene-responsive transcription factor 7
LOC106432340	NC_063448	42628971..42630545	6.359	3.138	8.803	0.000	106432340	DRN	Cole et al., 2009; Corral-Martínez et al., 2020	ethylene-responsive transcription factor 7
LOC106386151	NC_063445	42105863..42107428	0.115	2.700	6.499	0.031	106386151	DRN	Cole et al., 2009; Corral-Martínez et al., 2020	ethylene-responsive transcription factor 9
LOC106398162	NC_063448	complement(1166203..1167130)	2.594	-3.721	-13.183	0.000	106398162	DRN	Cole et al., 2009; Corral-Martínez et al., 2020	ethylene-responsive transcription factor 9
LOC106422972	NC_063443	1154635..1155706	0.790	-3.516	-11.437	0.017	106422972	DRN	Cole et al., 2009; Corral-Martínez et al., 2020	ethylene-responsive transcription factor 9-like
LOC106360118	NC_063441	complement(18544996..18559910)	0.594	-5.634	-49.666	0.034	106360118	DRN	Cole et al., 2009; Corral-Martínez et al., 2020	ethylene-responsive transcription factor ESR2-like
LOC125608066	NC_063437	16254349..16254980	0.168	6.276*	77.483*	0.031	125608066	GRP	Li et al., 2014; Corral-Martínez et al., 2020	glycine-rich protein DOT1-like
LOC106435276	NC_063447	complement(45662204..45663903)	9.613	-1.168	-2.247	0.000	106435276	GST	Joosen et al., 2007	glutathione S-transferase T1
LOC106430242	NC_063445	complement(24765712..24766685)	0.487	1.804	3.492	0.006	106430242	GST	Joosen et al., 2007	glutathione S-transferase U10
LOC106446511	NC_063449	36492522..36493717	0.142	3.886	14.783	0.011	106446511	GST	Joosen et al., 2007	glutathione S-transferase U11
LOC106447277	NC_063446	16454668..16455686	22.580	-2.865	-7.285	0.000	106447277	GST	Joosen et al., 2007	glutathione S-transferase U5
LOC106411439	NC_063436	29661801..29666837	0.472	1.045	2.064	0.028	106411439	HSL1	Seifert et al., 2016 (wheat)	B3 domain-containing transcription repressor VAL2
LOC125590154	NC_063450	52590547..52595601	0.946	2.226	4.678	0.000	125590154	HSL1	Seifert et al., 2016 (wheat)	B3 domain-containing transcription repressor VAL2-like
LOC106396549	NC_063450	complement(21711615..21715163)	0.220	-2.520	-5.738	0.044	106396549	HSL1	Seifert et al., 2016 (wheat)	receptor-like protein kinase HSL1
LOC106410538	NC_063450	27861426..27863125	20.898	-1.215	-2.322	0.000	106410538	HYD1	Malik et al., 2007	probable 3-beta-hydroxysteroid-Delta(8),Delta(7)-isomerase
LOC106454772	NC_063442	31912956..31915575	0.784	9.099*	548.216*	0.001	106454772	LEC1	Lotan et al., 1998; Corral-Martínez et al., 2020	nuclear transcription factor Y subunit B-9
LOC106358189	NC_063440	12740337..12742203	0.862	8.667*	406.584*	0.001	106358189	LEC1	Lotan et al., 1998; Corral-Martínez et al., 2020	nuclear transcription factor Y subunit B-9-like
LOC106425624	NC_063450	26425187..26427077	0.687	8.311*	317.683*	0.002	106425624	LEC1	Lotan et al., 1998; Corral-Martínez et al., 2020	nuclear transcription factor Y subunit B-9-like
LOC125575342	NC_063448	complement(13728954..13729598)	0.129	5.883*	59.015*	0.049	125575342	LEC1	Lotan et al., 1998; Corral-Martínez et al., 2020	nuclear transcription factor Y subunit B-9-like
LOC106356333	NC_063440	10806170..10809806	1.449	8.465	353.367	0.000	106356333	LEC2	Berger et al., 2011; Corral-Martínez et al., 2020	B3 domain-containing transcription factor LEC2-like
LOC106395640	NC_063450	21951889..21956784	0.622	9.464*	706.255*	0.000	106395640	LEC2	Berger et al., 2011; Corral-Martínez et al., 2020	B3 domain-containing transcription factor LEC2-like
LOC106418025	NC_063442	28762193..28770729	0.096	8.544*	373.143*	0.001	106418025	LEC2	Berger et al., 2011; Corral-Martínez et al., 2020	B3 domain-containing transcription factor LEC2-like
LOC125586844	NC_063448	complement(19653055..19657416)	0.540	9.282*	622.690*	0.000	125586844	LEC2	Berger et al., 2011; Corral-Martínez et al., 2020	B3 domain-containing transcription factor LEC2-like
LOC106444161	NC_063446	31703995..31705157	0.516	8.471*	354.844*	0.001	106444161	LTP	Joosen et al., 2007	non-specific lipid transfer protein GPI-anchored 20
LOC106389312	NC_063448	complement(38517020..38518684)	0.113	3.013	8.073	0.014	106389312	LTP	Joosen et al., 2007	non-specific lipid transfer protein GPI-anchored 20-like
LOC125585666	NC_063447	59327200..59328111	8.860	6.233	75.219	0.000	125585666	LTP	Joosen et al., 200	non-specific lipid-transfer protein B
LOC106410911	NC_063447	complement(6740389..6741313)	27.087	-2.948	-7.716	0.000	106410911	LTP	Joosen et al., 2007	non-specific lipid-transfer protein D
LOC106442906	NC_063447	complement(10251535..10252424)	3.424	4.909	30.043	0.000	106442906	MEE26	Joosen et al., 2007; Soriano et al., 2013; Corral-Martínez et al., 2020	follicular dendritic cell secreted peptide
LOC125609336	NC_063438	complement(5328824..5329737)	19.512	8.507	363.702	0.000	125609336	MEE26	Joosen et al., 2007; Soriano et al., 2013; Corral-Martínez et al., 2020	follicular dendritic cell secreted peptide-like
LOC106404195	NC_063446	11021844..11025631	0.795	10.896*	1,905.923*	0.000	106404195	MEE26	Joosen et al., 2007; Soriano et al., 2013; Corral-Martínez et al., 2020	uncharacterized LOC106404195
LOC106364907	NC_063442	complement(33677175..33680104)	0.765	9.567*	758.371*	0.000	106364907	PAP20	Slane et al., 2014; Corral-Martínez et al., 2020	probable purple acid phosphatase 20
LOC106367813	NC_063451	complement(36013665..36016665)	0.089	6.439*	86.753*	0.026	106367813	PAP20	Slane et al., 2014; Corral-Martínez et al., 2020	probable purple acid phosphatase 20
LOC125576337	NC_063440	24701877..24705323	0.290	-3.374	-10.367	0.023	125576337	PIN7	Friml et al., 2003; Corral-Martínez et al., 2020	auxin efflux carrier component 3-like
LOC106388774	NC_063435	complement(22946080..22949210)	6.965	3.855	14.470	0.000	106388774	PIN7	Friml et al., 2003; Corral-Martínez et al., 2020	auxin efflux carrier component 4
LOC106425911	NC_063451	complement(31143478..31147728)	0.145	6.112	69.164	0.000	106425911	PIN7	Friml et al., 2003; Corral-Martínez et al., 2020	auxin efflux carrier component 7-like
LOC106434219	NC_063441	19289711..19294675	0.133	1.834	3.565	0.005	106434219	PIN7	Friml et al., 2003; Corral-Martínez et al., 2020	auxin efflux carrier component 7-like
LOC125581968	NC_063445	complement(46637250..46640367)	0.608	1.418	2.672	0.006	125581968	PIN7	Friml et al., 2003; Corral-Martínez et al., 2020	auxin efflux carrier component 4-like
LOC106419032	NC_063443	17576698..17579084	4.229	-1.703	-3.255	0.000	106419032	PK3	Malik et al., 2007	probable serine/threonine-protein kinase DDB_G0291350
LOC111204082	NC_063445	complement(1287038..1289381)	3.017	1.511	2.850	0.000	111204082	PK3	Malik et al., 2007	serine/threonine-protein kinase 16-like
LOC106410612	NC_063450	43292495..43294696	0.689	-5.461	-44.062	0.040	106410612	RD22	Joosen et al., 2007	BURP domain protein RD22
LOC106440377	NC_063452	3789228..3792757	0.142	5.149	35.484	0.001	106440377	RD22	Joosen et al., 2007	BURP domain protein RD22
LOC106403767	NC_063445	54894957..54897405	4.947	-4.375	-20.744	0.000	106403767	RD22	Joosen et al., 2007	BURP domain protein RD22-like
LOC111207639	NC_063435	27637025..27639456	2.983	-5.832	-56.965	0.000	111207639	RD22	Joosen et al., 2007	BURP domain protein RD22-like
LOC106359298	NC_063441	complement(20218548..20226015)	4.099	7.167	143.718	0.000	106359298	RKD1	Seifert et al., 2016 (wheat)	agamous-like MADS-box protein AGL65
LOC106355312	NC_063440	13998954..14002299	0.055	6.839*	114.489*	0.016	106355312	RKD1	Seifert et al., 2016 (wheat)	putative ethylene-responsive transcription factor ERF121
LOC106454424	NC_063438	complement(825357..826125)	1.397	6.206	73.847	0.000	106454424	SAUR	Slane et al., 2014; Corral-Martínez et al., 2020	auxin-responsive protein SAUR32
LOC106449664	NC_063447	62490790..62491826	4.247	-2.571	-5.940	0.000	106449664	SAUR	Slane et al., 2014; Corral-Martínez et al., 2020	auxin-responsive protein SAUR32-like
LOC106376693	NC_063436	complement(30096897..30100006)	3.103	-1.283	-2.433	0.000	106376693	SERK1	Seifert et al., 2016 (wheat)	BRASSINOSTEROID INSENSITIVE 1-associated receptor kinase 1
LOC106353752	NC_063440	complement(20997525..21001075)	1.184	-3.935	-15.291	0.000	106353752	SERK1	Seifert et al., 2016 (wheat)	somatic embryogenesis receptor kinase 1
LOC106354174	NC_063440	24993226..24997503	8.937	-2.572	-5.946	0.000	106354174	SERK1	Seifert et al., 2016 (wheat)	somatic embryogenesis receptor kinase 1
LOC106401127	NC_063449	43569714..43573935	6.681	-2.068	-4.194	0.000	106401127	SERK1	Seifert et al., 2016 (wheat)	somatic embryogenesis receptor kinase 1
LOC106432272	NC_063449	complement(35634144..35637813)	2.748	-2.516	-5.722	0.000	106432272	SERK1	Seifert et al., 2016 (wheat)	somatic embryogenesis receptor kinase 1
LOC106410693	NC_063450	complement(11743634..11747781)	1.304	-1.021	-2.029	0.025	106410693	SERK1	Seifert et al., 2016 (wheat)	somatic embryogenesis receptor kinase 4
LOC125576208	NC_063440	complement(5336095..5340030)	3.540	-1.017	-2.023	0.000	125576208	SERK1	Seifert et al., 2016 (wheat)	somatic embryogenesis receptor kinase 4-like
LOC106371823	NC_063435	complement(1310783..1313751)	58.105	-1.130	-2.188	0.000	106371823	SMT1	Malik et al., 2007	cycloartenol-C-24-methyltransferase
LOC106431054	NC_063446	complement(3165556..3168772)	26.641	-2.889	-7.406	0.000	106431054	SMT1	Malik et al., 2007	cycloartenol-C-24-methyltransferase
LOC106440921	NC_063436	complement(2463108..2466415)	32.653	-1.693	-3.234	0.000	106440921	SMT1	Malik et al., 2007	cycloartenol-C-24-methyltransferase
LOC106351494	NC_063452	complement(8351646..8355287)	1.312	5.956	62.057	0.000	106351494	SSP	Bayer et al., 2009; Corral-Martínez et al., 2020	probable inactive receptor-like kinase BSK12
LOC106360751	NC_063442	complement(6314943..6322438)	0.663	7.133	140.361	0.000	106360751	SSP	Bayer et al., 2009; Corral-Martínez et al., 2020	probable inactive receptor-like kinase BSK12
LOC106379753	NC_063446	complement(36336035..36338316)	6.022	8.277	310.201	0.000	106379753	SSP	Bayer et al., 2009; Corral-Martínez et al., 2020	probable inactive receptor-like kinase BSK12
LOC125607074	NC_063436	complement(21492398..21496259)	3.273	8.283	311.589	0.000	125607074	SSP	Bayer et al., 2009; Corral-Martínez et al., 2020	probable inactive receptor-like kinase BSK12
LOC106348876	NC_063439	23500551..23504727	0.073	2.091	4.259	0.036	106348876	SUC3	Stadler et al., 2005; Corral-Martínez et al., 2020	sucrose synthase 2
LOC106345241	NC_063442	complement(254758..259074)	1.571	2.027	4.075	0.000	106345241	SUC3	Stadler et al., 2005; Corral-Martínez et al., 2020	sucrose synthase 3
LOC106365510	NC_063452	91309..95673	1.103	1.844	3.590	0.000	106365510	SUC3	Stadler et al., 2005; Corral-Martínez et al., 2020	sucrose synthase 3
LOC106419576	NC_063451	complement(3444577..3446213)	11.627	9.268	616.635	0.000	106419576	USPL1	Malik et al., 2007	dehydration-responsive protein RD22-like
LOC106443480	NC_063436	complement(8154068..8157106)	0.856	3.056	8.318	0.000	106443480	WOX9	Haecker et al., 2004; Corral-Martínez et al., 2020	WUSCHEL-related homeobox 9
LOC106385562	NC_063446	complement(10691837..10695317)	3.994	4.240	18.901	0.000	106385562	WOX9	Haecker et al., 2004; Corral-Martínez et al., 2020	WUSCHEL-related homeobox 9-like
LOC106387429	NC_063446	complement(7197645..7199900)	11.947	4.461	22.017	0.000	106387429	WRKY2	Ueda et al., 2011; Corral-Martínez et al., 2020	probable WRKY transcription factor 2
LOC106418234	NC_063452	46810186..46813777	12.168	1.102	2.146	0.000	106418234	WRKY2	Ueda et al., 2011; Corral-Martínez et al., 2020	probable WRKY transcription factor 2
LOC106437667	NC_063443	10514058..10517646	13.418	1.522	2.872	0.000	106437667	WRKY2	Ueda et al., 2011; Corral-Martínez et al., 2020	probable WRKY transcription factor 2
LOC111212586	NC_063436	complement(5602124..5605581)	4.853	6.154	71.200	0.000	111212586	WRKY2	Ueda et al., 2011; Corral-Martínez et al., 2020	probable WRKY transcription factor 2
LOC106438147	NC_063436	9475465..9478231	0.439	-2.389	-5.237	0.023	106438147	WRKY2	Ueda et al., 2011; Corral-Martínez et al., 2020	probable WRKY transcription factor 33
LOC106369119	NC_063442	complement(41826019..41828596)	0.069	3.376	10.385	0.019	106369119	WRKY2	Ueda et al., 2011; Corral-Martínez et al., 2020	probable WRKY transcription factor 4
LOC106366509	NC_063442	8926704..8931412	3.465	-1.188	-2.279	0.000	106366509	YDA	Lukowitz et al., 2004; Corral-Martínez et al., 2020	mitogen-activated protein kinase kinase kinase YODA
Comparison D2+PSK vs. D0: 96 DEG
Name	Chromosome	Region	Max group mean	Log₂ fold change	Fold change	FDR p-value	GeneID with hyperlink to NCBI	Gene name	Reference	Description in NCBI
LOC106431084	NC_063446	complement(3180038..3182150)	6.054	2.558	5.891	0.000	106431084	AGL15	Perry et al., 1996; Corral-Martínez et al., 2020	agamous-like MADS-box protein AGL15
LOC125579041	NC_063443	15990626..15992642	0.979	3.009	8.051	0.000	125579041	AGL15	Perry et al., 1996; Corral-Martínez et al., 2020	agamous-like MADS-box protein AGL15
LOC125593423	NC_063436	complement(2475847..2478062)	1.974	2.837	7.146	0.000	125593423	AGL15	Perry et al., 1996; Corral-Martínez et al., 2020	agamous-like MADS-box protein AGL15
LOC106384351	NC_063446	complement(29392089..29393980)	0.660	-2.145	-4.423	0.021	106384351	AGL53	Joosen et al., 2007	agamous-like MADS-box protein AGL103
LOC106393501	NC_063444	41583562..41587978	0.544	-2.308	-4.952	0.001	106393501	AGL53	Joosen et al., 2007	agamous-like MADS-box protein AGL103
LOC111204645	NC_063449	4781371..4785891	2.761	-3.448	-10.911	0.000	111204645	AGL53	Joosen et al., 2007	agamous-like MADS-box protein AGL53
LOC106448308	NC_063437	complement(9968499..9970533)	0.582	-3.779	-13.731	0.010	106448308	AGL53	Joosen et al., 2007	agamous-like MADS-box protein AGL75
LOC106384892	NC_063446	2330682..2335249	2.520	4.162	17.903	0.000	106384892	AIL5	Seifert et al., 2016 (wheat)	AP2-like ethylene-responsive transcription factor AIL6
LOC106346792	NC_063439	6456999..6459962	8.100	-3.498	-11.299	0.000	106346792	AIL5	Seifert et al., 2016 (wheat)	AP2-like ethylene-responsive transcription factor At1g16060
LOC106392431	NC_063448	8240191..8244287	8.658	-2.415	-5.332	0.000	106392431	AIL5	Seifert et al., 2016 (wheat)	AP2-like ethylene-responsive transcription factor At1g16060
LOC106412187	NC_063442	34420744..34424692	15.949	-2.906	-7.494	0.000	106412187	AIL5	Seifert et al., 2016 (wheat)	ethylene-responsive transcription factor WRI1
LOC106352859	NC_063440	16904803..16909525	13.549	-1.186	-2.275	0.000	106352859	AIL5	Seifert et al., 2016 (wheat)	ethylene-responsive transcription factor WRI1-like
LOC106412050	NC_063451	36920085..36923689	5.651	-1.874	-3.666	0.000	106412050	AIL5	Seifert et al., 2016 (wheat)	ethylene-responsive transcription factor WRI1-like
LOC106449641	NC_063435	11514003..11517663	0.356	3.581	11.965	0.000	106449641	BBM	Horstman et al., 2015; Corral-Martínez et al., 2020	AP2-like ethylene-responsive transcription factor AIL1
LOC125582086	NC_063445	23410674..23414123	0.832	4.206	18.460	0.000	125582086	BBM	Horstman et al., 2015; Corral-Martínez et al., 2020	AP2-like ethylene-responsive transcription factor AIL1
LOC106435311	NC_063452	complement(60672801..60677350)	3.441	4.341	20.260	0.000	106435311	BBM	Horstman et al., 2015; Corral-Martínez et al., 2020	AP2-like ethylene-responsive transcription factor AIL6
LOC125579068	NC_063443	complement(17013131..17017719)	0.635	9.688*	825.063*	0.000	125579068	BBM	Horstman et al., 2015; Corral-Martínez et al., 2020	AP2-like ethylene-responsive transcription factor AIL6
LOC125583548	NC_063446	complement(38154451..38157960)	1.782	2.625	6.171	0.000	125583548	BBM	Horstman et al., 2015; Corral-Martínez et al., 2020	AP2-like ethylene-responsive transcription factor AIL7
LOC106354804	NC_063440	complement(27981039..27984142)	2.248	-1.307	-2.475	0.027	106354804	BBM	Horstman et al., 2015; Corral-Martínez et al., 2020	AP2-like ethylene-responsive transcription factor At1g79700
LOC106426170	NC_063452	56612350..56615857	0.876	3.896	14.890	0.000	106426170	BBM	Horstman et al., 2015; Corral-Martínez et al., 2020	AP2-like ethylene-responsive transcription factor BBM1
LOC106357280	NC_063435	complement(2406782..2410507)	0.895	4.857	28.982	0.000	106357280	BBM	Horstman et al., 2015; Corral-Martínez et al., 2020	AP2-like ethylene-responsive transcription factor BBM2
LOC106385624	NC_063443	14877552..14881001	0.734	7.122	139.333	0.000	106385624	BBM	Horstman et al., 2015; Corral-Martínez et al., 2020	AP2-like ethylene-responsive transcription factor BBM2
LOC106369101	NC_063442	41918437..41920392	0.438	5.360	41.071	0.000	106369101	CYP78A5	Joosen et al., 2007; Soriano et al., 2013; Corral-Martínez et al., 2020	cytochrome P450 78A5-like
LOC106412358	NC_063451	46286747..46288802	0.336	5.446	43.590	0.000	106412358	CYP78A5	Joosen et al., 2007; Soriano et al., 2013; Corral-Martínez et al., 2020	cytochrome P450 78A5-like
LOC106356337	NC_063440	10740063..10740880	6.137	2.529	5.773	0.000	106356337	DRN	Cole et al., 2009; Corral-Martínez et al., 2020	ethylene-responsive transcription factor 11
LOC106422025	NC_063442	28671962..28672785	1.204	5.720	52.716	0.000	106422025	DRN	Cole et al., 2009; Corral-Martínez et al., 2020	ethylene-responsive transcription factor 11
LOC111212525	NC_063450	21858234..21858991	1.923	1.543	2.914	0.002	111212525	DRN	Cole et al., 2009; Corral-Martínez et al., 2020	ethylene-responsive transcription factor 11
LOC106454908	NC_063449	complement(9899940..9900958)	2.767	3.671	12.737	0.000	106454908	DRN	Cole et al., 2009; Corral-Martínez et al., 2020	ethylene-responsive transcription factor 4
LOC106402425	NC_063448	complement(48647859..48649034)	3.662	2.672	6.374	0.000	106402425	DRN	Cole et al., 2009; Corral-Martínez et al., 2020	ethylene-responsive transcription factor 4-like
LOC111198776	NC_063434	complement(26314017..26317277)	1.332	1.006	2.008	0.001	111198776	DRN	Cole et al., 2009; Corral-Martínez et al., 2020	ethylene-responsive transcription factor 4-like
LOC125580468	NC_063444	complement(44836210..44837461)	1.631	2.118	4.342	0.000	125580468	DRN	Cole et al., 2009; Corral-Martínez et al., 2020	ethylene-responsive transcription factor 4-like
LOC125597290	NW_026014833	10907..11897	6.617	3.904	14.974	0.000	125597290	DRN	Cole et al., 2009; Corral-Martínez et al., 2020	ethylene-responsive transcription factor 4-like
LOC106357505	NC_063438	20633645..20635444	5.272	3.111	8.638	0.000	106357505	DRN	Cole et al., 2009; Corral-Martínez et al., 2020	ethylene-responsive transcription factor 7
LOC106432340	NC_063448	42628971..42630545	7.030	3.243	9.465	0.000	106432340	DRN	Cole et al., 2009; Corral-Martínez et al., 2020	ethylene-responsive transcription factor 7
LOC106398162	NC_063448	complement(1166203..1167130)	2.594	-2.572	-5.948	0.000	106398162	DRN	Cole et al., 2009; Corral-Martínez et al., 2020	ethylene-responsive transcription factor 9
LOC125608066	NC_063437	16254349..16254980	0.186	6.168*	71.907*	0.027	125608066	GRP	Li et al., 2014; Corral-Martínez et al., 2020	glycine-rich protein DOT1-like
LOC106430242	NC_063445	complement(24765712..24766685)	0.545	2.040	4.114	0.003	106430242	GST	Joosen et al., 2007	glutathione S-transferase U10
LOC106447277	NC_063446	16454668..16455686	22.580	-4.242	-18.924	0.000	106447277	GST	Joosen et al., 2007	glutathione S-transferase U5
LOC125590154	NC_063450	52590547..52595601	0.778	1.899	3.729	0.000	125590154	HSL1	Seifert et al., 2016 (wheat)	B3 domain-containing transcription repressor VAL2-like
LOC106410538	NC_063450	27861426..27863125	20.898	-1.121	-2.176	0.000	106410538	HYD1	Malik et al., 2007	probable 3-beta-hydroxysteroid-Delta(8),Delta(7)-isomerase
LOC106418177	NC_063452	23671223..23674087	0.163	2.286	4.877	0.003	106418177	LEC1	Lotan et al., 1998; Corral-Martínez et al., 2020	nuclear transcription factor Y subunit B-6
LOC106454772	NC_063442	31912956..31915575	0.417	8.064*	267.679*	0.002	106454772	LEC1	Lotan et al., 1998; Corral-Martínez et al., 2020	nuclear transcription factor Y subunit B-9
LOC106358189	NC_063440	12740337..12742203	0.618	7.897*	238.416*	0.002	106358189	LEC1	Lotan et al., 1998; Corral-Martínez et al., 2020	nuclear transcription factor Y subunit B-9-like
LOC106425624	NC_063450	26425187..26427077	0.395	7.322*	160.030*	0.006	106425624	LEC1	Lotan et al., 1998; Corral-Martínez et al., 2020	nuclear transcription factor Y subunit B-9-like
LOC106356333	NC_063440	10806170..10809806	1.359	8.267	307.940	0.000	106356333	LEC2	Berger et al., 2011; Corral-Martínez et al., 2020	B3 domain-containing transcription factor LEC2-like
LOC106395640	NC_063450	21951889..21956784	0.408	8.662*	405.017*	0.001	106395640	LEC2	Berger et al., 2011; Corral-Martínez et al., 2020	B3 domain-containing transcription factor LEC2-like
LOC106418025	NC_063442	28762193..28770729	0.122	8.692*	413.592*	0.001	106418025	LEC2	Berger et al., 2011; Corral-Martínez et al., 2020	B3 domain-containing transcription factor LEC2-like
LOC125586844	NC_063448	complement(19653055..19657416)	0.232	7.897*	238.318*	0.002	125586844	LEC2	Berger et al., 2011; Corral-Martínez et al., 2020	B3 domain-containing transcription factor LEC2-like
LOC106444161	NC_063446	31703995..31705157	0.529	8.305*	316.291*	0.001	106444161	LTP	Joosen et al., 2007	non-specific lipid transfer protein GPI-anchored 20
LOC125585666	NC_063447	59327200..59328111	1.775	3.881	14.737	0.000	125585666	LTP	Joosen et al., 200	non-specific lipid-transfer protein B
LOC106410911	NC_063447	complement(6740389..6741313)	27.087	-5.205	-36.878	0.000	106410911	LTP	Joosen et al., 2007	non-specific lipid-transfer protein D
LOC106442906	NC_063447	complement(10251535..10252424)	0.954	3.064	8.361	0.000	106442906	MEE26	Joosen et al., 2007; Soriano et al., 2013; Corral-Martínez et al., 2020	follicular dendritic cell secreted peptide
LOC125609336	NC_063438	complement(5328824..5329737)	12.246	7.802	223.147	0.000	125609336	MEE26	Joosen et al., 2007; Soriano et al., 2013; Corral-Martínez et al., 2020	follicular dendritic cell secreted peptide-like
LOC106404195	NC_063446	11021844..11025631	0.384	9.665*	811.813*	0.000	106404195	MEE26	Joosen et al., 2007; Soriano et al., 2013; Corral-Martínez et al., 2020	uncharacterized LOC106404195
LOC106364907	NC_063442	complement(33677175..33680104)	0.504	8.762*	434.092*	0.000	106364907	PAP20	Slane et al., 2014; Corral-Martínez et al., 2020	probable purple acid phosphatase 20
LOC106367813	NC_063451	complement(36013665..36016665)	0.109	6.662*	101.275*	0.015	106367813	PAP20	Slane et al., 2014; Corral-Martínez et al., 2020	probable purple acid phosphatase 20
LOC106448794	NC_063449	complement(34441621..34451910)	0.014	3.918	15.113	0.045	106448794	PIN7	Friml et al., 2003; Corral-Martínez et al., 2020	auxin efflux carrier component 1-like
LOC106388774	NC_063435	complement(22946080..22949210)	6.987	3.814	14.064	0.000	106388774	PIN7	Friml et al., 2003; Corral-Martínez et al., 2020	auxin efflux carrier component 4
LOC106425911	NC_063451	complement(31143478..31147728)	0.130	5.777	54.830	0.000	106425911	PIN7	Friml et al., 2003; Corral-Martínez et al., 2020	auxin efflux carrier component 7-like
LOC106419032	NC_063443	17576698..17579084	4.229	-1.301	-2.463	0.000	106419032	PK3	Malik et al., 2007	probable serine/threonine-protein kinase DDB_G0291350
LOC111204082	NC_063445	complement(1287038..1289381)	3.017	1.298	2.459	0.000	111204082	PK3	Malik et al., 2007	serine/threonine-protein kinase 16-like
LOC106440377	NC_063452	3789228..3792757	0.260	5.883	59.023	0.000	106440377	RD22		BURP domain protein RD22
LOC106403767	NC_063445	54894957..54897405	4.947	-6.377	-83.096	0.000	106403767	RD22		BURP domain protein RD22-like
LOC111207639	NC_063435	27637025..27639456	2.983	-4.832	-28.473	0.000	111207639	RD22		BURP domain protein RD22-like
LOC106359298	NC_063441	complement(20218548..20226015)	4.055	7.148	141.853	0.000	106359298	RKD1	Seifert et al., 2016 (wheat)	agamous-like MADS-box protein AGL65
LOC106355312	NC_063440	13998954..14002299	0.086	7.377*	166.267*	0.005	106355312	RKD1	Seifert et al., 2016 (wheat)	putative ethylene-responsive transcription factor ERF121
LOC106454424	NC_063438	complement(825357..826125)	0.588	4.964	31.219	0.000	106454424	SAUR	Slane et al., 2014; Corral-Martínez et al., 2020	auxin-responsive protein SAUR32
LOC106449664	NC_063447	62490790..62491826	4.247	-3.406	-10.602	0.000	106449664	SAUR	Slane et al., 2014; Corral-Martínez et al., 2020	auxin-responsive protein SAUR32-like
LOC106361098	NC_063446	68465311..68469003	0.773	-1.694	-3.235	0.024	106361098	SERK1	Seifert et al., 2016 (wheat)	BRASSINOSTEROID INSENSITIVE 1-associated receptor kinase 1
LOC106376693	NC_063436	complement(30096897..30100006)	3.103	-1.296	-2.456	0.000	106376693	SERK1	Seifert et al., 2016 (wheat)	BRASSINOSTEROID INSENSITIVE 1-associated receptor kinase 1
LOC106411181	NC_063450	complement(52907763..52911011)	1.830	-1.414	-2.665	0.001	106411181	SERK1	Seifert et al., 2016 (wheat)	BRASSINOSTEROID INSENSITIVE 1-associated receptor kinase 1
LOC106438526	NC_063434	2352790..2356202	4.195	-1.439	-2.712	0.000	106438526	SERK1	Seifert et al., 2016 (wheat)	BRASSINOSTEROID INSENSITIVE 1-associated receptor kinase 1
LOC106353752	NC_063440	complement(20997525..21001075)	1.184	-6.993	-127.410	0.010	106353752	SERK1	Seifert et al., 2016 (wheat)	somatic embryogenesis receptor kinase 1
LOC106354174	NC_063440	24993226..24997503	8.937	-1.989	-3.971	0.000	106354174	SERK1	Seifert et al., 2016 (wheat)	somatic embryogenesis receptor kinase 1
LOC106401127	NC_063449	43569714..43573935	6.681	-2.639	-6.229	0.000	106401127	SERK1	Seifert et al., 2016 (wheat)	somatic embryogenesis receptor kinase 1
LOC106432272	NC_063449	complement(35634144..35637813)	2.748	-3.980	-15.776	0.000	106432272	SERK1	Seifert et al., 2016 (wheat)	somatic embryogenesis receptor kinase 1
LOC106371823	NC_063435	complement(1310783..1313751)	58.105	-1.218	-2.327	0.000	106371823	SMT1	Malik et al., 2007	cycloartenol-C-24-methyltransferase
LOC106431054	NC_063446	complement(3165556..3168772)	26.641	-3.206	-9.227	0.000	106431054	SMT1	Malik et al., 2007	cycloartenol-C-24-methyltransferase
LOC106440921	NC_063436	complement(2463108..2466415)	32.653	-1.436	-2.706	0.000	106440921	SMT1	Malik et al., 2007	cycloartenol-C-24-methyltransferase
LOC106351494	NC_063452	complement(8351646..8355287)	1.179	5.761	54.244	0.000	106351494	SSP	Bayer et al., 2009; Corral-Martínez et al., 2020	probable inactive receptor-like kinase BSK12
LOC106360751	NC_063442	complement(6314943..6322438)	0.493	6.645	100.071	0.000	106360751	SSP	Bayer et al., 2009; Corral-Martínez et al., 2020	probable inactive receptor-like kinase BSK12
LOC106379753	NC_063446	complement(36336035..36338316)	6.449	8.320	319.616	0.000	106379753	SSP	Bayer et al., 2009; Corral-Martínez et al., 2020	probable inactive receptor-like kinase BSK12
LOC125607074	NC_063436	complement(21492398..21496259)	3.272	8.234	301.125	0.000	125607074	SSP	Bayer et al., 2009; Corral-Martínez et al., 2020	probable inactive receptor-like kinase BSK12
LOC106407384	NC_063450	complement(41668964..41673278)	0.079	2.538	5.810	0.025	106407384	SUC3	Stadler et al., 2005; Corral-Martínez et al., 2020	sucrose synthase 2
LOC106345241	NC_063442	complement(254758..259074)	1.902	2.284	4.869	0.000	106345241	SUC3	Stadler et al., 2005; Corral-Martínez et al., 2020	sucrose synthase 3
LOC106365510	NC_063452	91309..95673	1.222	2.062	4.176	0.000	106365510	SUC3	Stadler et al., 2005; Corral-Martínez et al., 2020	sucrose synthase 3
LOC106419576	NC_063451	complement(3444577..3446213)	7.485	8.575	381.466	0.000	106419576	USPL1	Malik et al., 2007	dehydration-responsive protein RD22-like
LOC106351561	NC_063438	5864540..5866995	0.115	2.089	4.254	0.027	106351561	WOX9	Haecker et al., 2004; Corral-Martínez et al., 2020	WUSCHEL-related homeobox 9
LOC106443480	NC_063436	complement(8154068..8157106)	1.035	3.234	9.408	0.000	106443480	WOX9	Haecker et al., 2004; Corral-Martínez et al., 2020	WUSCHEL-related homeobox 9
LOC106385562	NC_063446	complement(10691837..10695317)	4.046	4.222	18.664	0.000	106385562	WOX9	Haecker et al., 2004; Corral-Martínez et al., 2020	WUSCHEL-related homeobox 9-like
LOC106387429	NC_063446	complement(7197645..7199900)	11.325	4.344	20.314	0.000	106387429	WRKY2	Ueda et al., 2011; Corral-Martínez et al., 2020	probable WRKY transcription factor 2
LOC106437667	NC_063443	10514058..10517646	13.418	1.257	2.389	0.000	106437667	WRKY2	Ueda et al., 2011; Corral-Martínez et al., 2020	probable WRKY transcription factor 2
LOC111212586	NC_063436	complement(5602124..5605581)	3.573	5.636	49.728	0.000	111212586	WRKY2	Ueda et al., 2011; Corral-Martínez et al., 2020	probable WRKY transcription factor 2
LOC106410925	NC_063446	12783053..12785018	0.641	-3.459	-10.998	0.022	106410925	WRKY2	Ueda et al., 2011; Corral-Martínez et al., 2020	probable WRKY transcription factor 33
LOC111198362	NC_063436	complement(15028275..15030812)	0.054	5.799*	55.660*	0.048	111198362	WRKY2	Ueda et al., 2011; Corral-Martínez et al., 2020	probable WRKY transcription factor 58
LOC111198363	NC_063446	complement(23015266..23017818)	0.125	7.029*	130.583*	0.009	111198363	WRKY2	Ueda et al., 2011; Corral-Martínez et al., 2020	probable WRKY transcription factor 58
Comparison D4+PSK vs. D4-PSK: 9 DEG
Name	Chromosome	Region	Max group mean	Log₂ fold change	Fold change	FDR p-value	GeneID with hyperlink to NCBI	Gene name	Reference	Description in NCBI
LOC106369101	NC_063442	41918437..41920392	23.895	-1.446	-2.724	0.000	106369101	CYP78A5	Joosen et al., 2007; Soriano et al., 2013; Corral-Martínez et al., 2020	cytochrome P450 78A5-like
LOC111216014	NC_063438	complement(7693902..7694315)	3.031	-2.263	-4.801	0.006	111216014	GRP	Li et al., 2014; Corral-Martínez et al., 2020	glycine-rich cell wall structural protein 1.0-like
LOC125608066	NC_063437	16254349..16254980	8.561	-1.521	-2.870	0.000	125608066	GRP	Li et al., 2014; Corral-Martínez et al., 2020	glycine-rich protein DOT1-like
LOC125585666	NC_063447	59327200..59328111	29.418	-2.257	-4.781	0.000	125585666	LTP	Joosen et al., 200	non-specific lipid-transfer protein B
LOC106442906	NC_063447	complement(10251535..10252424)	76.666	-1.872	-3.661	0.000	106442906	MEE26	Joosen et al., 2007; Soriano et al., 2013; Corral-Martínez et al., 2020	follicular dendritic cell secreted peptide
LOC125609336	NC_063438	complement(5328824..5329737)	216.473	-1.513	-2.853	0.000	125609336	MEE26	Joosen et al., 2007; Soriano et al., 2013; Corral-Martínez et al., 2020	follicular dendritic cell secreted peptide-like
LOC106404195	NC_063446	11021844..11025631	5.678	-1.387	-2.615	0.000	106404195	MEE26	Joosen et al., 2007; Soriano et al., 2013; Corral-Martínez et al., 2020	uncharacterized LOC106404195
LOC106439079	NC_063441	complement(2741710..2743091)	293.410	-1.231	-2.347	0.000	106439079	RD22	Joosen et al., 2007	dehydration-responsive protein RD22-like
LOC106419576	NC_063451	complement(3444577..3446213)	140.524	-1.528	-2.884	0.000	106419576	USPL1	Malik et al., 2007	dehydration-responsive protein RD22-like
Comparison D4-PSK vs. D0: 135 DEG
Name	Chromosome	Region	Max group mean	Log₂ fold change	Fold change	FDR p-value	GeneID with hyperlink to NCBI	Gene name	Reference	Description in NCBI
LOC106431084	NC_063446	complement(3180038..3182150)	3.836	1.784	3.443	0.000	106431084	AGL15	Perry et al., 1996; Corral-Martínez et al., 2020	agamous-like MADS-box protein AGL15
LOC125579041	NC_063443	15990626..15992642	2.511	4.227	18.722	0.000	125579041	AGL15	Perry et al., 1996; Corral-Martínez et al., 2020	agamous-like MADS-box protein AGL15
LOC125593423	NC_063436	complement(2475847..2478062)	2.183	2.905	7.489	0.000	125593423	AGL15	Perry et al., 1996; Corral-Martínez et al., 2020	agamous-like MADS-box protein AGL15
LOC106384351	NC_063446	complement(29392089..29393980)	0.660	-5.836	-57.105	0.034	106384351	AGL53	Joosen et al., 2007	agamous-like MADS-box protein AGL103
LOC106393501	NC_063444	41583562..41587978	0.544	-3.110	-8.632	0.000	106393501	AGL53	Joosen et al., 2007	agamous-like MADS-box protein AGL103
LOC111204645	NC_063449	4781371..4785891	2.761	-4.010	-16.107	0.000	111204645	AGL53	Joosen et al., 2007	agamous-like MADS-box protein AGL53
LOC106448308	NC_063437	complement(9968499..9970533)	0.582	-3.022	-8.125	0.008	106448308	AGL53	Joosen et al., 2007	agamous-like MADS-box protein AGL75
LOC106384892	NC_063446	2330682..2335249	3.800	4.673	25.518	0.000	106384892	AIL5	Seifert et al., 2016 (wheat)	AP2-like ethylene-responsive transcription factor AIL6
LOC106346792	NC_063439	6456999..6459962	8.100	-3.905	-14.976	0.000	106346792	AIL5	Seifert et al., 2016 (wheat)	AP2-like ethylene-responsive transcription factor At1g16060
LOC106392431	NC_063448	8240191..8244287	8.658	-2.630	-6.189	0.000	106392431	AIL5	Seifert et al., 2016 (wheat)	AP2-like ethylene-responsive transcription factor At1g16060
LOC106430692	NC_063449	complement(47811415..47814364)	10.419	-1.259	-2.393	0.000	106430692	AIL5	Seifert et al., 2016 (wheat)	AP2-like ethylene-responsive transcription factor At1g79700
LOC106412187	NC_063442	34420744..34424692	15.949	-2.064	-4.182	0.000	106412187	AIL5	Seifert et al., 2016 (wheat)	ethylene-responsive transcription factor WRI1
LOC106352859	NC_063440	16904803..16909525	13.549	-1.138	-2.200	0.000	106352859	AIL5	Seifert et al., 2016 (wheat)	ethylene-responsive transcription factor WRI1-like
LOC106412050	NC_063451	36920085..36923689	5.651	-1.063	-2.089	0.001	106412050	AIL5	Seifert et al., 2016 (wheat)	ethylene-responsive transcription factor WRI1-like
LOC106449641	NC_063435	11514003..11517663	0.546	4.075	16.857	0.000	106449641	BBM	Horstman et al., 2015; Corral-Martínez et al., 2020	AP2-like ethylene-responsive transcription factor AIL1
LOC125582086	NC_063445	23410674..23414123	1.298	4.766	27.201	0.000	125582086	BBM	Horstman et al., 2015; Corral-Martínez et al., 2020	AP2-like ethylene-responsive transcription factor AIL1
LOC125583608	NC_063435	4774330..4777738	0.067	2.571	5.943	0.049	125583608	BBM	Horstman et al., 2015; Corral-Martínez et al., 2020	AP2-like ethylene-responsive transcription factor AIL5
LOC106383204	NW_026013928	complement(68137..72397)	0.230	2.759	6.771	0.002	106383204	BBM	Horstman et al., 2015; Corral-Martínez et al., 2020	AP2-like ethylene-responsive transcription factor AIL6
LOC106416655	NC_063445	complement(1870497..1875001)	0.364	1.752	3.369	0.008	106416655	BBM	Horstman et al., 2015; Corral-Martínez et al., 2020	AP2-like ethylene-responsive transcription factor AIL6
LOC106435311	NC_063452	complement(60672801..60677350)	3.614	4.316	19.921	0.000	106435311	BBM	Horstman et al., 2015; Corral-Martínez et al., 2020	AP2-like ethylene-responsive transcription factor AIL6
LOC125579068	NC_063443	complement(17013131..17017719)	1.019	10.295*	1,256.389*	0.000	125579068	BBM	Horstman et al., 2015; Corral-Martínez et al., 2020	AP2-like ethylene-responsive transcription factor AIL6
LOC125583548	NC_063446	complement(38154451..38157960)	1.211	1.979	3.942	0.000	125583548	BBM	Horstman et al., 2015; Corral-Martínez et al., 2020	AP2-like ethylene-responsive transcription factor AIL7
LOC106354804	NC_063440	complement(27981039..27984142)	2.248	-2.425	-5.371	0.000	106354804	BBM	Horstman et al., 2015; Corral-Martínez et al., 2020	AP2-like ethylene-responsive transcription factor At1g79700
LOC106426170	NC_063452	56612350..56615857	9.406	7.262	153.450	0.000	106426170	BBM	Horstman et al., 2015; Corral-Martínez et al., 2020	AP2-like ethylene-responsive transcription factor BBM1
LOC106357280	NC_063435	complement(2406782..2410507)	7.761	7.916	241.487	0.000	106357280	BBM	Horstman et al., 2015; Corral-Martínez et al., 2020	AP2-like ethylene-responsive transcription factor BBM2
LOC106385624	NC_063443	14877552..14881001	6.331	10.118	1,111.162	0.000	106385624	BBM	Horstman et al., 2015; Corral-Martínez et al., 2020	AP2-like ethylene-responsive transcription factor BBM2
LOC106409762	NC_063435	complement(2164118..2168405)	1.831	11.494*	2,884.404*	0.000	106409762	BBM	Horstman et al., 2015; Corral-Martínez et al., 2020	AP2-like ethylene-responsive transcription factor BBM2
LOC125581296	NC_063445	complement(3212118..3216421)	0.084	7.101*	137.276*	0.008	125581296	BBM	Horstman et al., 2015; Corral-Martínez et al., 2020	AP2-like ethylene-responsive transcription factor BBM2
LOC106379388	NC_063434	complement(23452465..23457902)	0.341	4.847	28.789	0.000	106379388	BBM	Horstman et al., 2015; Corral-Martínez et al., 2020	AP2-like ethylene-responsive transcription factor PLT1
LOC106400311	NC_063448	complement(41599981..41603868)	0.102	7.391*	167.798*	0.005	106400311	BBM	Horstman et al., 2015; Corral-Martínez et al., 2020	AP2-like ethylene-responsive transcription factor PLT1
LOC106351090	NC_063439	complement(1672895..1677961)	0.303	3.099	8.570	0.000	106351090	BBM	Horstman et al., 2015; Corral-Martínez et al., 2020	AP2-like ethylene-responsive transcription factor PLT2
LOC111206225	NC_063448	complement(26207823..26214396)	0.228	4.122	17.413	0.000	111206225	BBM	Horstman et al., 2015; Corral-Martínez et al., 2020	AP2-like ethylene-responsive transcription factor PLT2
LOC111206694	NC_063449	7758762..7761954	0.462	4.165	17.934	0.000	111206694	BBM	Horstman et al., 2015; Corral-Martínez et al., 2020	AP2-like ethylene-responsive transcription factor PLT2
LOC125609557	NC_063438	13852145..13858220	0.025	3.526	11.522	0.036	125609557	BBM	Horstman et al., 2015; Corral-Martínez et al., 2020	AP2-like ethylene-responsive transcription factor PLT2
LOC106380989	NC_063448	complement(6353963..6355957)	0.398	6.084	67.823	0.000	106380989	CYP78A5	Joosen et al., 2007; Soriano et al., 2013; Corral-Martínez et al., 2020	cytochrome P450 78A5
LOC106369101	NC_063442	41918437..41920392	23.895	11.068	2,147.268	0.000	106369101	CYP78A5	Joosen et al., 2007; Soriano et al., 2013; Corral-Martínez et al., 2020	cytochrome P450 78A5-like
LOC106412358	NC_063451	46286747..46288802	24.692	11.550	2,998.223	0.000	106412358	CYP78A5	Joosen et al., 2007; Soriano et al., 2013; Corral-Martínez et al., 2020	cytochrome P450 78A5-like
LOC106356337	NC_063440	10740063..10740880	7.988	2.827	7.096	0.000	106356337	DRN	Cole et al., 2009; Corral-Martínez et al., 2020	ethylene-responsive transcription factor 11
LOC106422025	NC_063442	28671962..28672785	1.678	6.079	67.607	0.000	106422025	DRN	Cole et al., 2009; Corral-Martínez et al., 2020	ethylene-responsive transcription factor 11
LOC111212525	NC_063450	21858234..21858991	3.941	2.862	7.269	0.000	111212525	DRN	Cole et al., 2009; Corral-Martínez et al., 2020	ethylene-responsive transcription factor 11
LOC106397060	NC_063438	complement(23634826..23635913)	0.988	3.221	9.324	0.010	106397060	DRN	Cole et al., 2009; Corral-Martínez et al., 2020	ethylene-responsive transcription factor 4
LOC106454908	NC_063449	complement(9899940..9900958)	0.769	1.727	3.311	0.002	106454908	DRN	Cole et al., 2009; Corral-Martínez et al., 2020	ethylene-responsive transcription factor 4
LOC106402425	NC_063448	complement(48647859..48649034)	3.604	2.563	5.910	0.000	106402425	DRN	Cole et al., 2009; Corral-Martínez et al., 2020	ethylene-responsive transcription factor 4-like
LOC125597290	NW_026014833	10907..11897	3.698	2.997	7.984	0.000	125597290	DRN	Cole et al., 2009; Corral-Martínez et al., 2020	ethylene-responsive transcription factor 4-like
LOC106357505	NC_063438	20633645..20635444	5.070	2.975	7.865	0.000	106357505	DRN	Cole et al., 2009; Corral-Martínez et al., 2020	ethylene-responsive transcription factor 7
LOC106432340	NC_063448	42628971..42630545	7.882	3.326	10.026	0.000	106432340	DRN	Cole et al., 2009; Corral-Martínez et al., 2020	ethylene-responsive transcription factor 7
LOC106386151	NC_063445	42105863..42107428	0.204	3.404	10.585	0.002	106386151	DRN	Cole et al., 2009; Corral-Martínez et al., 2020	ethylene-responsive transcription factor 9
LOC106398162	NC_063448	complement(1166203..1167130)	2.594	-3.544	-11.665	0.000	106398162	DRN	Cole et al., 2009; Corral-Martínez et al., 2020	ethylene-responsive transcription factor 9
LOC106422972	NC_063443	1154635..1155706	0.790	-3.364	-10.295	0.024	106422972	DRN	Cole et al., 2009; Corral-Martínez et al., 2020	ethylene-responsive transcription factor 9-like
LOC106351557	NC_063438	5944171..5946383	0.127	6.736*	106.574*	0.015	106351557	DRN	Cole et al., 2009; Corral-Martínez et al., 2020	ethylene-responsive transcription factor ERF112
LOC106360118	NC_063441	complement(18544996..18559910)	0.594	-5.592	-48.223	0.045	106360118	DRN	Cole et al., 2009; Corral-Martínez et al., 2020	ethylene-responsive transcription factor ESR2-like
LOC111216014	NC_063438	complement(7693902..7694315)	3.031	9.394*	672.868*	0.000	111216014	GRP	Li et al., 2014; Corral-Martínez et al., 2020	glycine-rich cell wall structural protein 1.0-like
LOC106414019	NC_063447	complement(14947555..14991195)	0.407	7.098*	137.030*	0.008	106414019	GRP	Li et al., 2014; Corral-Martínez et al., 2020	glycine-rich protein DOT1
LOC125608066	NC_063437	16254349..16254980	8.561	11.492*	2,879.675*	0.000	125608066	GRP	Li et al., 2014; Corral-Martínez et al., 2020	glycine-rich protein DOT1-like
LOC106438680	NC_063436	14235453..14236897	0.198	6.776*	109.564*	0.013	106438680	GST	Joosen et al., 2007	glutathione S-transferase F2
LOC106426574	NC_063445	31993238..31994513	0.734	6.182	72.603	0.000	106426574	GST	Joosen et al., 2007	glutathione S-transferase F3-like
LOC106435276	NC_063447	complement(45662204..45663903)	9.613	-1.710	-3.272	0.000	106435276	GST	Joosen et al., 2007	glutathione S-transferase T1
LOC106430242	NC_063445	complement(24765712..24766685)	1.211	3.107	8.613	0.000	106430242	GST	Joosen et al., 2007	glutathione S-transferase U10
LOC106446511	NC_063449	36492522..36493717	0.249	4.589	24.064	0.001	106446511	GST	Joosen et al., 2007	glutathione S-transferase U11
LOC106447277	NC_063446	16454668..16455686	22.580	-2.211	-4.629	0.000	106447277	GST	Joosen et al., 2007	glutathione S-transferase U5
LOC106446968	NC_063447	complement(53534873..53535867)	2.305	1.629	3.094	0.000	106446968	GST	Joosen et al., 2007	glutathione S-transferase U7
LOC106446969	NC_063447	complement(53546494..53548358)	0.405	4.628	24.726	0.000	106446969	GST	Joosen et al., 2007	glutathione S-transferase U7
LOC106411439	NC_063436	29661801..29666837	0.472	1.512	2.853	0.001	106411439	HSL1	Seifert et al., 2016 (wheat)	B3 domain-containing transcription repressor VAL2
LOC125590154	NC_063450	52590547..52595601	1.578	2.835	7.134	0.000	125590154	HSL1	Seifert et al., 2016 (wheat)	B3 domain-containing transcription repressor VAL2-like
LOC106410538	NC_063450	27861426..27863125	20.898	-1.541	-2.911	0.000	106410538	HYD1	Malik et al., 2007	probable 3-beta-hydroxysteroid-Delta(8),Delta(7)-isomerase
LOC106454772	NC_063442	31912956..31915575	6.256	11.835*	3,653.211*	0.000	106454772	LEC1	Lotan et al., 1998; Corral-Martínez et al., 2020	nuclear transcription factor Y subunit B-9
LOC106358189	NC_063440	12740337..12742203	7.558	11.441*	2,780.753*	0.000	106358189	LEC1	Lotan et al., 1998; Corral-Martínez et al., 2020	nuclear transcription factor Y subunit B-9-like
LOC106425624	NC_063450	26425187..26427077	6.562	11.242*	2,421.733*	0.000	106425624	LEC1	Lotan et al., 1998; Corral-Martínez et al., 2020	nuclear transcription factor Y subunit B-9-like
LOC125575342	NC_063448	complement(13728954..13729598)	1.310	8.823*	452.845*	0.000	125575342	LEC1	Lotan et al., 1998; Corral-Martínez et al., 2020	nuclear transcription factor Y subunit B-9-like
LOC106356333	NC_063440	10806170..10809806	5.993	10.318	1,276.667	0.000	106356333	LEC2	Berger et al., 2011; Corral-Martínez et al., 2020	B3 domain-containing transcription factor LEC2-like
LOC106395640	NC_063450	21951889..21956784	2.452	11.217*	2,380.734*	0.000	106395640	LEC2	Berger et al., 2011; Corral-Martínez et al., 2020	B3 domain-containing transcription factor LEC2-like
LOC106418025	NC_063442	28762193..28770729	0.489	10.585*	1,536.032*	0.000	106418025	LEC2	Berger et al., 2011; Corral-Martínez et al., 2020	B3 domain-containing transcription factor LEC2-like
LOC125586844	NC_063448	complement(19653055..19657416)	1.454	10.409*	1,359.343*	0.000	125586844	LEC2	Berger et al., 2011; Corral-Martínez et al., 2020	B3 domain-containing transcription factor LEC2-like
LOC106444161	NC_063446	31703995..31705157	0.301	7.455*	175.479*	0.004	106444161	LTP	Joosen et al., 2007	non-specific lipid transfer protein GPI-anchored 20
LOC106366544	NC_063442	complement(9367336..9369523)	7.164	2.189	4.560	0.000	106366544	LTP	Joosen et al., 2007	non-specific lipid transfer protein GPI-anchored 7
LOC125585666	NC_063447	59327200..59328111	29.418	7.864	233.010	0.000	125585666	LTP	Joosen et al., 200	non-specific lipid-transfer protein B
LOC106410911	NC_063447	complement(6740389..6741313)	27.087	-3.116	-8.668	0.000	106410911	LTP	Joosen et al., 2007	non-specific lipid-transfer protein D
LOC106442906	NC_063447	complement(10251535..10252424)	76.666	9.283	623.159	0.000	106442906	MEE26	Joosen et al., 2007; Soriano et al., 2013; Corral-Martínez et al., 2020	follicular dendritic cell secreted peptide
LOC125609336	NC_063438	complement(5328824..5329737)	216.473	11.854	3,702.806	0.000	125609336	MEE26	Joosen et al., 2007; Soriano et al., 2013; Corral-Martínez et al., 2020	follicular dendritic cell secreted peptide-like
LOC106404195	NC_063446	11021844..11025631	5.678	13.486*	11,474.437*	0.000	106404195	MEE26	Joosen et al., 2007; Soriano et al., 2013; Corral-Martínez et al., 2020	uncharacterized LOC106404195
LOC106364907	NC_063442	complement(33677175..33680104)	7.031	12.456*	5,618.312*	0.000	106364907	PAP20	Slane et al., 2014; Corral-Martínez et al., 2020	probable purple acid phosphatase 20
LOC106367813	NC_063451	complement(36013665..36016665)	2.535	11.013*	2,066.007*	0.000	106367813	PAP20	Slane et al., 2014; Corral-Martínez et al., 2020	probable purple acid phosphatase 20
LOC106439727	NC_063449	complement(36046025..36050528)	0.120	2.989	7.941	0.003	106439727	PIN7	Friml et al., 2003; Corral-Martínez et al., 2020	auxin efflux carrier component 3
LOC106388774	NC_063435	complement(22946080..22949210)	4.781	3.190	9.124	0.000	106388774	PIN7	Friml et al., 2003; Corral-Martínez et al., 2020	auxin efflux carrier component 4
LOC106425911	NC_063451	complement(31143478..31147728)	0.101	5.396	42.102	0.001	106425911	PIN7	Friml et al., 2003; Corral-Martínez et al., 2020	auxin efflux carrier component 7-like
LOC106384983	NC_063436	complement(1449067..1451257)	6.233	-1.241	-2.364	0.000	106384983	PK3	Malik et al., 2007	probable serine/threonine-protein kinase DDB_G0291350
LOC106419032	NC_063443	17576698..17579084	4.229	-1.554	-2.936	0.000	106419032	PK3	Malik et al., 2007	probable serine/threonine-protein kinase DDB_G0291350
LOC106433885	NC_063452	61626228..61628893	6.133	-1.383	-2.608	0.000	106433885	PK3	Malik et al., 2007	probable serine/threonine-protein kinase DDB_G0291350
LOC125584052	NC_063446	complement(1854435..1856650)	7.873	-1.020	-2.028	0.000	125584052	PK3	Malik et al., 2007	probable serine/threonine-protein kinase DDB_G0291350
LOC111204082	NC_063445	complement(1287038..1289381)	3.017	1.296	2.456	0.000	111204082	PK3	Malik et al., 2007	serine/threonine-protein kinase 16-like
LOC106440377	NC_063452	3789228..3792757	0.088	4.333	20.156	0.017	106440377	RD22		BURP domain protein RD22
LOC106403767	NC_063445	54894957..54897405	4.947	-3.478	-11.143	0.000	106403767	RD22		BURP domain protein RD22-like
LOC111207639	NC_063435	27637025..27639456	2.983	-5.689	-51.605	0.000	111207639	RD22		BURP domain protein RD22-like
LOC106439079	NC_063441	complement(2741710..2743091)	293.410	3.557	11.769	0.000	106439079	RD22	Joosen et al., 2007	dehydration-responsive protein RD22-like
LOC106359298	NC_063441	complement(20218548..20226015)	5.149	7.377	166.239	0.000	106359298	RKD1	Seifert et al., 2016 (wheat)	agamous-like MADS-box protein AGL65
LOC106355312	NC_063440	13998954..14002299	0.206	8.455*	350.998*	0.001	106355312	RKD1	Seifert et al., 2016 (wheat)	putative ethylene-responsive transcription factor ERF121
LOC106454424	NC_063438	complement(825357..826125)	3.034	7.204	147.395	0.000	106454424	SAUR	Slane et al., 2014; Corral-Martínez et al., 2020	auxin-responsive protein SAUR32
LOC106376693	NC_063436	complement(30096897..30100006)	3.103	-1.777	-3.428	0.000	106376693	SERK1	Seifert et al., 2016 (wheat)	BRASSINOSTEROID INSENSITIVE 1-associated receptor kinase 1
LOC106411181	NC_063450	complement(52907763..52911011)	1.830	-1.766	-3.400	0.000	106411181	SERK1	Seifert et al., 2016 (wheat)	BRASSINOSTEROID INSENSITIVE 1-associated receptor kinase 1
LOC106405819	NC_063441	13789623..13793264	0.276	1.885	3.695	0.003	106405819	SERK1	Seifert et al., 2016 (wheat)	BRASSINOSTEROID INSENSITIVE 1-associated receptor kinase 1-like
LOC106353752	NC_063440	complement(20997525..21001075)	1.184	-3.381	-10.418	0.000	106353752	SERK1	Seifert et al., 2016 (wheat)	somatic embryogenesis receptor kinase 1
LOC106354174	NC_063440	24993226..24997503	8.937	-2.769	-6.815	0.000	106354174	SERK1	Seifert et al., 2016 (wheat)	somatic embryogenesis receptor kinase 1
LOC106401127	NC_063449	43569714..43573935	6.681	-3.505	-11.356	0.000	106401127	SERK1	Seifert et al., 2016 (wheat)	somatic embryogenesis receptor kinase 1
LOC106432272	NC_063449	complement(35634144..35637813)	2.748	-2.098	-4.282	0.000	106432272	SERK1	Seifert et al., 2016 (wheat)	somatic embryogenesis receptor kinase 1
LOC106410693	NC_063450	complement(11743634..11747781)	1.304	-1.831	-3.558	0.000	106410693	SERK1	Seifert et al., 2016 (wheat)	somatic embryogenesis receptor kinase 4
LOC125576208	NC_063440	complement(5336095..5340030)	3.540	-1.309	-2.478	0.000	125576208	SERK1	Seifert et al., 2016 (wheat)	somatic embryogenesis receptor kinase 4-like
LOC106371823	NC_063435	complement(1310783..1313751)	58.105	-1.959	-3.888	0.000	106371823	SMT1	Malik et al., 2007	cycloartenol-C-24-methyltransferase
LOC106431054	NC_063446	complement(3165556..3168772)	26.641	-3.627	-12.358	0.000	106431054	SMT1	Malik et al., 2007	cycloartenol-C-24-methyltransferase
LOC106440921	NC_063436	complement(2463108..2466415)	32.653	-2.084	-4.241	0.000	106440921	SMT1	Malik et al., 2007	cycloartenol-C-24-methyltransferase
LOC106351494	NC_063452	complement(8351646..8355287)	3.651	7.308	158.514	0.000	106351494	SSP	Bayer et al., 2009; Corral-Martínez et al., 2020	probable inactive receptor-like kinase BSK12
LOC106360751	NC_063442	complement(6314943..6322438)	1.849	8.469	354.448	0.000	106360751	SSP	Bayer et al., 2009; Corral-Martínez et al., 2020	probable inactive receptor-like kinase BSK12
LOC106379753	NC_063446	complement(36336035..36338316)	19.912	9.872	937.310	0.000	106379753	SSP	Bayer et al., 2009; Corral-Martínez et al., 2020	probable inactive receptor-like kinase BSK12
LOC125607074	NC_063436	complement(21492398..21496259)	9.371	9.663	810.497	0.000	125607074	SSP	Bayer et al., 2009; Corral-Martínez et al., 2020	probable inactive receptor-like kinase BSK12
LOC106348876	NC_063439	23500551..23504727	0.194	3.308	9.901	0.000	106348876	SUC3	Stadler et al., 2005; Corral-Martínez et al., 2020	sucrose synthase 2
LOC106407384	NC_063450	complement(41668964..41673278)	0.124	3.101	8.577	0.003	106407384	SUC3	Stadler et al., 2005; Corral-Martínez et al., 2020	sucrose synthase 2
LOC106345241	NC_063442	complement(254758..259074)	1.457	1.043	2.060	0.000	106345241	SUC3	Stadler et al., 2005; Corral-Martínez et al., 2020	sucrose synthase 3
LOC106365510	NC_063452	91309..95673	1.103	1.376	2.596	0.000	106365510	SUC3	Stadler et al., 2005; Corral-Martínez et al., 2020	sucrose synthase 3
LOC106419576	NC_063451	complement(3444577..3446213)	140.524	12.731	6,798.129	0.000	106419576	USPL1	Malik et al., 2007	dehydration-responsive protein RD22-like
LOC106417355	NC_063445	6685087..6687127	0.134	4.464	22.070	0.004	106417355	WOX2	Haecker et al., 2004; Corral-Martínez et al., 2020	WUSCHEL-related homeobox 2-like
LOC125593043	NC_063452	complement(50527141..50528869)	0.267	3.904	14.969	0.003	125593043	WOX2	Haecker et al., 2004; Corral-Martínez et al., 2020	WUSCHEL-related homeobox 2-like
LOC106420426	NC_063443	complement(12106250..12108186)	0.159	6.621*	98.462*	0.018	106420426	WOX2	Haecker et al., 2004; Corral-Martínez et al., 2020	WUSCHEL-related homeobox 2-like
LOC106351561	NC_063438	5864540..5866995	1.230	5.298	39.354	0.000	106351561	WOX9	Haecker et al., 2004; Corral-Martínez et al., 2020	WUSCHEL-related homeobox 9
LOC106379486	NC_063447	11179295..11181993	1.427	4.664	25.352	0.000	106379486	WOX9	Haecker et al., 2004; Corral-Martínez et al., 2020	WUSCHEL-related homeobox 9
LOC106443480	NC_063436	complement(8154068..8157106)	0.988	3.109	8.628	0.000	106443480	WOX9	Haecker et al., 2004; Corral-Martínez et al., 2020	WUSCHEL-related homeobox 9
LOC106385562	NC_063446	complement(10691837..10695317)	6.231	4.773	27.344	0.000	106385562	WOX9	Haecker et al., 2004; Corral-Martínez et al., 2020	WUSCHEL-related homeobox 9-like
LOC106387429	NC_063446	complement(7197645..7199900)	9.328	3.986	15.842	0.000	106387429	WRKY2	Ueda et al., 2011; Corral-Martínez et al., 2020	probable WRKY transcription factor 2
LOC106437667	NC_063443	10514058..10517646	13.418	1.032	2.045	0.000	106437667	WRKY2	Ueda et al., 2011; Corral-Martínez et al., 2020	probable WRKY transcription factor 2
LOC111212586	NC_063436	complement(5602124..5605581)	2.631	5.146	35.400	0.000	111212586	WRKY2	Ueda et al., 2011; Corral-Martínez et al., 2020	probable WRKY transcription factor 2
LOC125600750	NC_063436	complement(5734048..5736657)	0.045	3.859	14.506	0.050	125600750	WRKY2	Ueda et al., 2011; Corral-Martínez et al., 2020	probable WRKY transcription factor 20
LOC106410409	NC_063450	complement(37320548..37323020)	0.284	2.132	4.383	0.001	106410409	WRKY2	Ueda et al., 2011; Corral-Martínez et al., 2020	probable WRKY transcription factor 3
LOC106410925	NC_063446	12783053..12785018	0.641	1.242	2.365	0.028	106410925	WRKY2	Ueda et al., 2011; Corral-Martínez et al., 2020	probable WRKY transcription factor 33
LOC106450955	NC_063447	complement(6788641..6791141)	0.317	1.697	3.243	0.018	106450955	WRKY2	Ueda et al., 2011; Corral-Martínez et al., 2020	probable WRKY transcription factor 33
LOC106369119	NC_063442	complement(41826019..41828596)	0.222	4.760	27.094	0.000	106369119	WRKY2	Ueda et al., 2011; Corral-Martínez et al., 2020	probable WRKY transcription factor 4
LOC111198362	NC_063436	complement(15028275..15030812)	0.131	6.996*	127.670*	0.008	111198362	WRKY2	Ueda et al., 2011; Corral-Martínez et al., 2020	probable WRKY transcription factor 58
LOC111198363	NC_063446	complement(23015266..23017818)	0.130	6.996*	127.669*	0.009	111198363	WRKY2	Ueda et al., 2011; Corral-Martínez et al., 2020	probable WRKY transcription factor 58
Comparison D4+PSK vs. D0: 129 DEG
Name	Chromosome	Region	Max group mean	Log₂ fold change	Fold change	FDR p-value	GeneID with hyperlink to NCBI	Gene name	Reference	Description in NCBI
LOC106431084	NC_063446	complement(3180038..3182150)	3.836	1.358	2.564	0.000	106431084	AGL15	Perry et al., 1996; Corral-Martínez et al., 2020	agamous-like MADS-box protein AGL15
LOC125579041	NC_063443	15990626..15992642	2.036	3.912	15.049	0.000	125579041	AGL15	Perry et al., 1996; Corral-Martínez et al., 2020	agamous-like MADS-box protein AGL15
LOC125593423	NC_063436	complement(2475847..2478062)	2.164	2.877	7.346	0.000	125593423	AGL15	Perry et al., 1996; Corral-Martínez et al., 2020	agamous-like MADS-box protein AGL15
LOC106366712	NC_063434	24686646..24688096	0.647	-3.648	-12.532	0.017	106366712	AGL53	Joosen et al., 2007	agamous-like MADS-box protein AGL103
LOC106384351	NC_063446	complement(29392089..29393980)	0.660	-2.722	-6.598	0.007	106384351	AGL53	Joosen et al., 2007	agamous-like MADS-box protein AGL103
LOC106393501	NC_063444	41583562..41587978	0.544	-3.639	-12.455	0.000	106393501	AGL53	Joosen et al., 2007	agamous-like MADS-box protein AGL103
LOC111204645	NC_063449	4781371..4785891	2.761	-3.120	-8.696	0.000	111204645	AGL53	Joosen et al., 2007	agamous-like MADS-box protein AGL53
LOC106448308	NC_063437	complement(9968499..9970533)	0.582	-1.990	-3.974	0.026	106448308	AGL53	Joosen et al., 2007	agamous-like MADS-box protein AGL75
LOC106384892	NC_063446	2330682..2335249	4.552	4.929	30.466	0.000	106384892	AIL5	Seifert et al., 2016 (wheat)	AP2-like ethylene-responsive transcription factor AIL6
LOC106346792	NC_063439	6456999..6459962	8.100	-3.938	-15.326	0.000	106346792	AIL5	Seifert et al., 2016 (wheat)	AP2-like ethylene-responsive transcription factor At1g16060
LOC106392431	NC_063448	8240191..8244287	8.658	-3.145	-8.843	0.000	106392431	AIL5	Seifert et al., 2016 (wheat)	AP2-like ethylene-responsive transcription factor At1g16060
LOC106430692	NC_063449	complement(47811415..47814364)	10.419	-1.738	-3.335	0.000	106430692	AIL5	Seifert et al., 2016 (wheat)	AP2-like ethylene-responsive transcription factor At1g79700
LOC106412187	NC_063442	34420744..34424692	15.949	-2.879	-7.356	0.000	106412187	AIL5	Seifert et al., 2016 (wheat)	ethylene-responsive transcription factor WRI1
LOC106352859	NC_063440	16904803..16909525	13.549	-1.467	-2.764	0.000	106352859	AIL5	Seifert et al., 2016 (wheat)	ethylene-responsive transcription factor WRI1-like
LOC106407626	NC_063449	24841069..24845184	6.032	-1.274	-2.418	0.000	106407626	AIL5	Seifert et al., 2016 (wheat)	ethylene-responsive transcription factor WRI1-like
LOC106412050	NC_063451	36920085..36923689	5.651	-1.946	-3.852	0.000	106412050	AIL5	Seifert et al., 2016 (wheat)	ethylene-responsive transcription factor WRI1-like
LOC106449641	NC_063435	11514003..11517663	0.634	4.288	19.534	0.000	106449641	BBM	Horstman et al., 2015; Corral-Martínez et al., 2020	AP2-like ethylene-responsive transcription factor AIL1
LOC125582086	NC_063445	23410674..23414123	1.626	5.062	33.416	0.000	125582086	BBM	Horstman et al., 2015; Corral-Martínez et al., 2020	AP2-like ethylene-responsive transcription factor AIL1
LOC106435311	NC_063452	complement(60672801..60677350)	4.847	4.711	26.195	0.000	106435311	BBM	Horstman et al., 2015; Corral-Martínez et al., 2020	AP2-like ethylene-responsive transcription factor AIL6
LOC125579068	NC_063443	complement(17013131..17017719)	1.180	10.576*	1,526.929*	0.000	125579068	BBM	Horstman et al., 2015; Corral-Martínez et al., 2020	AP2-like ethylene-responsive transcription factor AIL6
LOC125583548	NC_063446	complement(38154451..38157960)	1.374	2.132	4.383	0.000	125583548	BBM	Horstman et al., 2015; Corral-Martínez et al., 2020	AP2-like ethylene-responsive transcription factor AIL7
LOC106407338	NC_063450	54338175..54341120	0.397	-3.461	-11.011	0.026	106407338	BBM	Horstman et al., 2015; Corral-Martínez et al., 2020	AP2-like ethylene-responsive transcription factor ANT
LOC106354804	NC_063440	complement(27981039..27984142)	2.248	-2.239	-4.720	0.001	106354804	BBM	Horstman et al., 2015; Corral-Martínez et al., 2020	AP2-like ethylene-responsive transcription factor At1g79700
LOC106426170	NC_063452	56612350..56615857	10.860	7.457	175.671	0.000	106426170	BBM	Horstman et al., 2015; Corral-Martínez et al., 2020	AP2-like ethylene-responsive transcription factor BBM1
LOC106357280	NC_063435	complement(2406782..2410507)	8.598	8.039	263.074	0.000	106357280	BBM	Horstman et al., 2015; Corral-Martínez et al., 2020	AP2-like ethylene-responsive transcription factor BBM2
LOC106385624	NC_063443	14877552..14881001	6.121	10.082	1,083.828	0.000	106385624	BBM	Horstman et al., 2015; Corral-Martínez et al., 2020	AP2-like ethylene-responsive transcription factor BBM2
LOC106409762	NC_063435	complement(2164118..2168405)	2.554	12.029*	4,178.629*	0.000	106409762	BBM	Horstman et al., 2015; Corral-Martínez et al., 2020	AP2-like ethylene-responsive transcription factor BBM2
LOC125581296	NC_063445	complement(3212118..3216421)	0.071	6.902*	119.601*	0.013	125581296	BBM	Horstman et al., 2015; Corral-Martínez et al., 2020	AP2-like ethylene-responsive transcription factor BBM2
LOC106345205	NW_026016323	229187..233106	0.177	8.222*	298.652*	0.002	106345205	BBM	Horstman et al., 2015; Corral-Martínez et al., 2020	AP2-like ethylene-responsive transcription factor PLT1
LOC106379388	NC_063434	complement(23452465..23457902)	0.289	4.554	23.498	0.000	106379388	BBM	Horstman et al., 2015; Corral-Martínez et al., 2020	AP2-like ethylene-responsive transcription factor PLT1
LOC106400311	NC_063448	complement(41599981..41603868)	0.078	7.057*	133.167*	0.011	106400311	BBM	Horstman et al., 2015; Corral-Martínez et al., 2020	AP2-like ethylene-responsive transcription factor PLT1
LOC111206225	NC_063448	complement(26207823..26214396)	0.109	3.029	8.163	0.007	111206225	BBM	Horstman et al., 2015; Corral-Martínez et al., 2020	AP2-like ethylene-responsive transcription factor PLT2
LOC111206694	NC_063449	7758762..7761954	0.304	3.625	12.337	0.000	111206694	BBM	Horstman et al., 2015; Corral-Martínez et al., 2020	AP2-like ethylene-responsive transcription factor PLT2
LOC106346553	NC_063439	complement(5358555..5360529)	0.102	4.856	28.956	0.007	106346553	CYP78A5	Joosen et al., 2007; Soriano et al., 2013; Corral-Martínez et al., 2020	cytochrome P450 78A5
LOC106380989	NC_063448	complement(6353963..6355957)	0.265	5.501	45.287	0.000	106380989	CYP78A5	Joosen et al., 2007; Soriano et al., 2013; Corral-Martínez et al., 2020	cytochrome P450 78A5
LOC106369101	NC_063442	41918437..41920392	8.858	9.630	792.459	0.000	106369101	CYP78A5	Joosen et al., 2007; Soriano et al., 2013; Corral-Martínez et al., 2020	cytochrome P450 78A5-like
LOC106412358	NC_063451	46286747..46288802	13.294	10.654	1,611.143	0.000	106412358	CYP78A5	Joosen et al., 2007; Soriano et al., 2013; Corral-Martínez et al., 2020	cytochrome P450 78A5-like
LOC106356337	NC_063440	10740063..10740880	8.562	2.936	7.651	0.000	106356337	DRN	Cole et al., 2009; Corral-Martínez et al., 2020	ethylene-responsive transcription factor 11
LOC106422025	NC_063442	28671962..28672785	2.123	6.423	85.814	0.000	106422025	DRN	Cole et al., 2009; Corral-Martínez et al., 2020	ethylene-responsive transcription factor 11
LOC111212525	NC_063450	21858234..21858991	4.837	3.167	8.984	0.000	111212525	DRN	Cole et al., 2009; Corral-Martínez et al., 2020	ethylene-responsive transcription factor 11
LOC106382776	NW_026015055	8946..10197	0.802	-5.585	-47.995	0.043	106382776	DRN	Cole et al., 2009; Corral-Martínez et al., 2020	ethylene-responsive transcription factor 4
LOC106454908	NC_063449	complement(9899940..9900958)	1.164	2.374	5.185	0.000	106454908	DRN	Cole et al., 2009; Corral-Martínez et al., 2020	ethylene-responsive transcription factor 4
LOC106402425	NC_063448	complement(48647859..48649034)	2.766	2.167	4.492	0.000	106402425	DRN	Cole et al., 2009; Corral-Martínez et al., 2020	ethylene-responsive transcription factor 4-like
LOC125580468	NC_063444	complement(44836210..44837461)	1.448	1.250	2.379	0.002	125580468	DRN	Cole et al., 2009; Corral-Martínez et al., 2020	ethylene-responsive transcription factor 4-like
LOC125597290	NW_026014833	10907..11897	3.413	2.871	7.313	0.000	125597290	DRN	Cole et al., 2009; Corral-Martínez et al., 2020	ethylene-responsive transcription factor 4-like
LOC125603867	NW_026016496	8673..9924	0.949	-5.827	-56.753	0.033	125603867	DRN	Cole et al., 2009; Corral-Martínez et al., 2020	ethylene-responsive transcription factor 4-like
LOC106357505	NC_063438	20633645..20635444	5.465	3.074	8.419	0.000	106357505	DRN	Cole et al., 2009; Corral-Martínez et al., 2020	ethylene-responsive transcription factor 7
LOC106432340	NC_063448	42628971..42630545	8.767	3.468	11.067	0.000	106432340	DRN	Cole et al., 2009; Corral-Martínez et al., 2020	ethylene-responsive transcription factor 7
LOC106354875	NW_026015026	7915..9815	0.148	6.947*	123.392*	0.018	106354875	DRN	Cole et al., 2009; Corral-Martínez et al., 2020	ethylene-responsive transcription factor 7-like
LOC106386151	NC_063445	42105863..42107428	0.137	2.793	6.929	0.020	106386151	DRN	Cole et al., 2009; Corral-Martínez et al., 2020	ethylene-responsive transcription factor 9
LOC106398162	NC_063448	complement(1166203..1167130)	2.594	-6.891	-118.690	0.008	106398162	DRN	Cole et al., 2009; Corral-Martínez et al., 2020	ethylene-responsive transcription factor 9
LOC106360118	NC_063441	complement(18544996..18559910)	0.594	-5.671	-50.960	0.036	106360118	DRN	Cole et al., 2009; Corral-Martínez et al., 2020	ethylene-responsive transcription factor ESR2-like
LOC111216014	NC_063438	complement(7693902..7694315)	0.602	7.171*	144.104*	0.009	111216014	GRP	Li et al., 2014; Corral-Martínez et al., 2020	glycine-rich cell wall structural protein 1.0-like
LOC125608066	NC_063437	16254349..16254980	2.999	10.045*	1,056.466*	0.000	125608066	GRP	Li et al., 2014; Corral-Martínez et al., 2020	glycine-rich protein DOT1-like
LOC106426574	NC_063445	31993238..31994513	0.308	4.947	30.842	0.000	106426574	GST	Joosen et al., 2007	glutathione S-transferase F3-like
LOC106435276	NC_063447	complement(45662204..45663903)	9.613	-2.101	-4.290	0.000	106435276	GST	Joosen et al., 2007	glutathione S-transferase T1
LOC106430242	NC_063445	complement(24765712..24766685)	0.888	2.632	6.201	0.000	106430242	GST	Joosen et al., 2007	glutathione S-transferase U10
LOC106446511	NC_063449	36492522..36493717	0.110	3.399	10.546	0.043	106446511	GST	Joosen et al., 2007	glutathione S-transferase U11
LOC106447277	NC_063446	16454668..16455686	22.580	-2.944	-7.696	0.000	106447277	GST	Joosen et al., 2007	glutathione S-transferase U5
LOC106411439	NC_063436	29661801..29666837	0.472	1.482	2.793	0.001	106411439	HSL1	Seifert et al., 2016 (wheat)	B3 domain-containing transcription repressor VAL2
LOC125590154	NC_063450	52590547..52595601	2.074	3.218	9.304	0.000	125590154	HSL1	Seifert et al., 2016 (wheat)	B3 domain-containing transcription repressor VAL2-like
LOC106410538	NC_063450	27861426..27863125	20.898	-1.176	-2.260	0.000	106410538	HYD1	Malik et al., 2007	probable 3-beta-hydroxysteroid-Delta(8),Delta(7)-isomerase
LOC106418177	NC_063452	23671223..23674087	0.170	2.269	4.820	0.002	106418177	LEC1	Lotan et al., 1998; Corral-Martínez et al., 2020	nuclear transcription factor Y subunit B-6
LOC106454772	NC_063442	31912956..31915575	4.245	11.361*	2,630.323*	0.000	106454772	LEC1	Lotan et al., 1998; Corral-Martínez et al., 2020	nuclear transcription factor Y subunit B-9
LOC106358189	NC_063440	12740337..12742203	5.165	10.964*	1,997.504*	0.000	106358189	LEC1	Lotan et al., 1998; Corral-Martínez et al., 2020	nuclear transcription factor Y subunit B-9-like
LOC106425624	NC_063450	26425187..26427077	4.064	10.619*	1,572.274*	0.000	106425624	LEC1	Lotan et al., 1998; Corral-Martínez et al., 2020	nuclear transcription factor Y subunit B-9-like
LOC125575342	NC_063448	complement(13728954..13729598)	1.367	8.956*	496.759*	0.000	125575342	LEC1	Lotan et al., 1998; Corral-Martínez et al., 2020	nuclear transcription factor Y subunit B-9-like
LOC106356333	NC_063440	10806170..10809806	6.622	10.468	1,416.194	0.000	106356333	LEC2	Berger et al., 2011; Corral-Martínez et al., 2020	B3 domain-containing transcription factor LEC2-like
LOC106379955	NW_026015135	13989..18250	0.119	4.920	30.269	0.010	106379955	LEC2	Berger et al., 2011; Corral-Martínez et al., 2020	B3 domain-containing transcription factor LEC2-like
LOC106395640	NC_063450	21951889..21956784	2.142	11.074*	2,155.571*	0.000	106395640	LEC2	Berger et al., 2011; Corral-Martínez et al., 2020	B3 domain-containing transcription factor LEC2-like
LOC106418025	NC_063442	28762193..28770729	0.481	10.626*	1,580.007*	0.000	106418025	LEC2	Berger et al., 2011; Corral-Martínez et al., 2020	B3 domain-containing transcription factor LEC2-like
LOC125586844	NC_063448	complement(19653055..19657416)	1.307	10.343*	1,298.969*	0.000	125586844	LEC2	Berger et al., 2011; Corral-Martínez et al., 2020	B3 domain-containing transcription factor LEC2-like
LOC106444161	NC_063446	31703995..31705157	0.353	7.777*	219.343*	0.003	106444161	LTP	Joosen et al., 2007	non-specific lipid transfer protein GPI-anchored 20
LOC106366544	NC_063442	complement(9367336..9369523)	5.475	1.520	2.868	0.000	106366544	LTP	Joosen et al., 2007	non-specific lipid transfer protein GPI-anchored 7
LOC125585666	NC_063447	59327200..59328111	6.210	5.607	48.735	0.000	125585666	LTP	Joosen et al., 200	non-specific lipid-transfer protein B
LOC106410911	NC_063447	complement(6740389..6741313)	27.087	-3.690	-12.905	0.000	106410911	LTP	Joosen et al., 2007	non-specific lipid-transfer protein D
LOC106442906	NC_063447	complement(10251535..10252424)	21.111	7.411	170.208	0.000	106442906	MEE26	Joosen et al., 2007; Soriano et al., 2013; Corral-Martínez et al., 2020	follicular dendritic cell secreted peptide
LOC125609336	NC_063438	complement(5328824..5329737)	76.293	10.343	1,298.898	0.000	125609336	MEE26	Joosen et al., 2007; Soriano et al., 2013; Corral-Martínez et al., 2020	follicular dendritic cell secreted peptide-like
LOC106404195	NC_063446	11021844..11025631	2.186	12.173*	4,619.083*	0.000	106404195	MEE26	Joosen et al., 2007; Soriano et al., 2013; Corral-Martínez et al., 2020	uncharacterized LOC106404195
LOC106364907	NC_063442	complement(33677175..33680104)	10.162	13.051*	8,486.703*	0.000	106364907	PAP20	Slane et al., 2014; Corral-Martínez et al., 2020	probable purple acid phosphatase 20
LOC106367813	NC_063451	complement(36013665..36016665)	3.517	11.551*	3,001.280*	0.000	106367813	PAP20	Slane et al., 2014; Corral-Martínez et al., 2020	probable purple acid phosphatase 20
LOC125576337	NC_063440	24701877..24705323	0.290	-3.362	-10.282	0.023	125576337	PIN7	Friml et al., 2003; Corral-Martínez et al., 2020	auxin efflux carrier component 3-like
LOC106388774	NC_063435	complement(22946080..22949210)	5.792	3.454	10.962	0.000	106388774	PIN7	Friml et al., 2003; Corral-Martínez et al., 2020	auxin efflux carrier component 4
LOC106425911	NC_063451	complement(31143478..31147728)	0.300	6.941	122.837	0.000	106425911	PIN7	Friml et al., 2003; Corral-Martínez et al., 2020	auxin efflux carrier component 7-like
LOC106434219	NC_063441	19289711..19294675	0.157	2.084	4.240	0.001	106434219	PIN7	Friml et al., 2003; Corral-Martínez et al., 2020	auxin efflux carrier component 7-like
LOC106384983	NC_063436	complement(1449067..1451257)	6.233	-1.537	-2.901	0.000	106384983	PK3	Malik et al., 2007	probable serine/threonine-protein kinase DDB_G0291350
LOC106419032	NC_063443	17576698..17579084	4.229	-1.882	-3.687	0.000	106419032	PK3	Malik et al., 2007	probable serine/threonine-protein kinase DDB_G0291350
LOC106433885	NC_063452	61626228..61628893	6.133	-1.617	-3.067	0.000	106433885	PK3	Malik et al., 2007	probable serine/threonine-protein kinase DDB_G0291350
LOC125584052	NC_063446	complement(1854435..1856650)	7.873	-1.149	-2.217	0.000	125584052	PK3	Malik et al., 2007	probable serine/threonine-protein kinase DDB_G0291350
LOC106403767	NC_063445	54894957..54897405	4.947	-5.265	-38.465	0.000	106403767	RD22		BURP domain protein RD22-like
LOC111207639	NC_063435	27637025..27639456	2.983	-7.724	-211.387	0.003	111207639	RD22		BURP domain protein RD22-like
LOC106439079	NC_063441	complement(2741710..2743091)	126.006	2.326	5.013	0.000	106439079	RD22	Joosen et al., 2007	dehydration-responsive protein RD22-like
LOC106359298	NC_063441	complement(20218548..20226015)	4.914	7.283	155.790	0.000	106359298	RKD1	Seifert et al., 2016 (wheat)	agamous-like MADS-box protein AGL65
LOC106355312	NC_063440	13998954..14002299	0.240	8.796*	444.366*	0.001	106355312	RKD1	Seifert et al., 2016 (wheat)	putative ethylene-responsive transcription factor ERF121
LOC106413737	NC_063447	complement(1174580..1175339)	0.122	5.841*	57.325*	0.044	106413737	SAUR	Slane et al., 2014; Corral-Martínez et al., 2020	auxin-responsive protein SAUR32
LOC106454424	NC_063438	complement(825357..826125)	1.797	6.440	86.809	0.000	106454424	SAUR	Slane et al., 2014; Corral-Martínez et al., 2020	auxin-responsive protein SAUR32
LOC106376693	NC_063436	complement(30096897..30100006)	3.103	-1.779	-3.433	0.000	106376693	SERK1	Seifert et al., 2016 (wheat)	BRASSINOSTEROID INSENSITIVE 1-associated receptor kinase 1
LOC106411181	NC_063450	complement(52907763..52911011)	1.830	-2.225	-4.675	0.000	106411181	SERK1	Seifert et al., 2016 (wheat)	BRASSINOSTEROID INSENSITIVE 1-associated receptor kinase 1
LOC106353752	NC_063440	complement(20997525..21001075)	1.184	-3.911	-15.045	0.000	106353752	SERK1	Seifert et al., 2016 (wheat)	somatic embryogenesis receptor kinase 1
LOC106354174	NC_063440	24993226..24997503	8.937	-2.848	-7.202	0.000	106354174	SERK1	Seifert et al., 2016 (wheat)	somatic embryogenesis receptor kinase 1
LOC106401127	NC_063449	43569714..43573935	6.681	-3.493	-11.256	0.000	106401127	SERK1	Seifert et al., 2016 (wheat)	somatic embryogenesis receptor kinase 1
LOC106432272	NC_063449	complement(35634144..35637813)	2.748	-3.354	-10.224	0.000	106432272	SERK1	Seifert et al., 2016 (wheat)	somatic embryogenesis receptor kinase 1
LOC106410693	NC_063450	complement(11743634..11747781)	1.304	-2.651	-6.283	0.000	106410693	SERK1	Seifert et al., 2016 (wheat)	somatic embryogenesis receptor kinase 4
LOC106371823	NC_063435	complement(1310783..1313751)	58.105	-2.095	-4.274	0.000	106371823	SMT1	Malik et al., 2007	cycloartenol-C-24-methyltransferase
LOC106431054	NC_063446	complement(3165556..3168772)	26.641	-4.012	-16.133	0.000	106431054	SMT1	Malik et al., 2007	cycloartenol-C-24-methyltransferase
LOC106440921	NC_063436	complement(2463108..2466415)	32.653	-2.167	-4.490	0.000	106440921	SMT1	Malik et al., 2007	cycloartenol-C-24-methyltransferase
LOC106351494	NC_063452	complement(8351646..8355287)	4.115	7.469	177.214	0.000	106351494	SSP	Bayer et al., 2009; Corral-Martínez et al., 2020	probable inactive receptor-like kinase BSK12
LOC106360751	NC_063442	complement(6314943..6322438)	1.949	8.535	371.056	0.000	106360751	SSP	Bayer et al., 2009; Corral-Martínez et al., 2020	probable inactive receptor-like kinase BSK12
LOC106379753	NC_063446	complement(36336035..36338316)	20.370	9.895	952.290	0.000	106379753	SSP	Bayer et al., 2009; Corral-Martínez et al., 2020	probable inactive receptor-like kinase BSK12
LOC125607074	NC_063436	complement(21492398..21496259)	8.564	9.521	734.801	0.000	125607074	SSP	Bayer et al., 2009; Corral-Martínez et al., 2020	probable inactive receptor-like kinase BSK12
LOC106348876	NC_063439	23500551..23504727	0.115	2.549	5.851	0.003	106348876	SUC3	Stadler et al., 2005; Corral-Martínez et al., 2020	sucrose synthase 2
LOC106407384	NC_063450	complement(41668964..41673278)	0.242	4.056	16.629	0.000	106407384	SUC3	Stadler et al., 2005; Corral-Martínez et al., 2020	sucrose synthase 2
LOC106365510	NC_063452	91309..95673	1.247	2.012	4.033	0.000	106365510	SUC3	Stadler et al., 2005; Corral-Martínez et al., 2020	sucrose synthase 3
LOC106419576	NC_063451	complement(3444577..3446213)	49.177	11.212	2,371.580	0.000	106419576	USPL1	Malik et al., 2007	dehydration-responsive protein RD22-like
LOC106361837	NC_063435	4091947..4095531	0.037	6.105*	68.840*	0.038	106361837	WOX2	Haecker et al., 2004; Corral-Martínez et al., 2020	WUSCHEL-related homeobox 2-like
LOC106417355	NC_063445	6685087..6687127	0.082	3.758	13.525	0.013	106417355	WOX2	Haecker et al., 2004; Corral-Martínez et al., 2020	WUSCHEL-related homeobox 2-like
LOC111210860	NW_026015290	33569..36129	0.092	5.841*	57.325*	0.044	111210860	WOX8	Haecker et al., 2004; Corral-Martínez et al., 2020	WUSCHEL-related homeobox 11-like
LOC106351561	NC_063438	5864540..5866995	1.034	5.057	33.288	0.000	106351561	WOX9	Haecker et al., 2004; Corral-Martínez et al., 2020	WUSCHEL-related homeobox 9
LOC106379486	NC_063447	11179295..11181993	0.816	3.843	14.352	0.000	106379486	WOX9	Haecker et al., 2004; Corral-Martínez et al., 2020	WUSCHEL-related homeobox 9
LOC106443480	NC_063436	complement(8154068..8157106)	1.050	3.202	9.200	0.000	106443480	WOX9	Haecker et al., 2004; Corral-Martínez et al., 2020	WUSCHEL-related homeobox 9
LOC106385562	NC_063446	complement(10691837..10695317)	6.233	4.758	27.053	0.000	106385562	WOX9	Haecker et al., 2004; Corral-Martínez et al., 2020	WUSCHEL-related homeobox 9-like
LOC106387429	NC_063446	complement(7197645..7199900)	8.724	3.874	14.665	0.000	106387429	WRKY2	Ueda et al., 2011; Corral-Martínez et al., 2020	probable WRKY transcription factor 2
LOC106418234	NC_063452	46810186..46813777	12.168	1.048	2.068	0.000	106418234	WRKY2	Ueda et al., 2011; Corral-Martínez et al., 2020	probable WRKY transcription factor 2
LOC106437667	NC_063443	10514058..10517646	13.418	1.205	2.306	0.000	106437667	WRKY2	Ueda et al., 2011; Corral-Martínez et al., 2020	probable WRKY transcription factor 2
LOC111212586	NC_063436	complement(5602124..5605581)	3.431	5.531	46.238	0.000	111212586	WRKY2	Ueda et al., 2011; Corral-Martínez et al., 2020	probable WRKY transcription factor 2
LOC106410409	NC_063450	complement(37320548..37323020)	0.483	2.886	7.390	0.000	106410409	WRKY2	Ueda et al., 2011; Corral-Martínez et al., 2020	probable WRKY transcription factor 3
LOC106369119	NC_063442	complement(41826019..41828596)	0.167	4.440	21.700	0.000	106369119	WRKY2	Ueda et al., 2011; Corral-Martínez et al., 2020	probable WRKY transcription factor 4
LOC111198362	NC_063436	complement(15028275..15030812)	0.091	6.544*	93.342*	0.017	111198362	WRKY2	Ueda et al., 2011; Corral-Martínez et al., 2020	probable WRKY transcription factor 58
LOC111198363	NC_063446	complement(23015266..23017818)	0.053	5.826*	56.721*	0.048	111198363	WRKY2	Ueda et al., 2011; Corral-Martínez et al., 2020	probable WRKY transcription factor 58
